# Supplementary material for: Small RNA expression and miRNA modification dynamics in human oocytes and early embryos
Source: HighWire-hosted journal article supplement (doi:10.1101/gr.268193.120), 2021-08-01
Supplement: Supplemental_Methods.pdf [file Supplemental_Methods.pdf]

1     **Supplemental Methods**

2     **Small RNA expression and miRNA modification dynamics in human oocytes and early embryos**

3

4     Pauliina Paloviita, Christel Hydén-Granskog, Dawit A. Yohannes, Priit Paluoja, Juha Kere, Juha S.  
5     Tapanainen, Kaarel Krjutškov, Timo Tuuri, Urmo Võsa and Sanna Vuoristo\*

6

7

8     \*Corresponding author Sanna Vuoristo, Functional Embryo Genomics Lab, Biomedicum Helsinki 1,  
9     Haartmaninkatu 8, A430B, FI-00014, University of Helsinki, Helsinki, Finland. Email:  
10    [sanna.vuoristo@helsinki.fi](mailto:sanna.vuoristo@helsinki.fi) Phone: +358 9 471 717 30

11

12

13

14

15

16    **Contents**

17    Supplemental Methods ..... 2-7

18    Supplemental Methods References .....8-9

19

20

21

22

23

24

25

## 26 **Immunocytochemistry and confocal imaging of human embryos**

27 Four-cell ( $n=3$ ) and 8-cell ( $n=2$ ) embryos were washed briefly in PBS (Corning), fixed in 3.8% PFA at room  
28 temperature for 15 min, and washed three times in washing buffer (0.1% (v/v) Tween20 in PBS). Embryos  
29 were permeabilised in 0.5% (v/v) Triton X-100 in PBS at room temperature for 15 minutes. After three washes,  
30 unspecific primary antibody binding was blocked by incubating the samples in ProteinBlock (Thermo Fisher  
31 Scientific) at room temperature for 10 minutes. The samples were incubated in primary monoclonal antibodies  
32 (1:100 rabbit anti-DGCR8, clone 3F5 (MA5-24860; Thermo Fisher Scientific) and 4  $\mu\text{g/ml}$  mouse anti-  
33 DICER, clone CL0378 (MA5-31353; Thermo Fisher Scientific) diluted in washing buffer at 4°C overnight.  
34 The samples were washed three times and incubated with fluorescent secondary antibodies (donkey anti-rabbit  
35 488 (A21206), and donkey anti-mouse 594 (A21203), both from Thermo Fisher Scientific) diluted 1:500 in  
36 washing buffer, for 2 hours at room temperature. The samples were washed twice in washing buffer, and nuclei  
37 were labelled with DAPI (1:1000 in washing buffer) at room temperature for 10 minutes. The samples were  
38 washed and transferred in washing buffer and imaged on Ibidi 8-well  $\mu$  slide using a Leica TCS SP8 confocal  
39 laser scanning microscope (Leica Systems, Mannheim, Germany). Images were captured with HC PL APO  
40 CS2 40X/1.10NA water objective and processed using Fiji (<http://fiji.sc>). The representative single z-planes  
41 images were smoothened using a Gaussian filter (radius=1 pixel kernel).

## 42 **Sequencing library preparation**

43 Small RNA (sRNA) sequencing (sRNA-seq) library preparation was performed using NEBNext Small RNA  
44 Library Prep Set for Illumina kit (New England Biolabs, NEB) with following modifications. The samples  
45 were briefly rinsed in  $\text{Ca}_2^{+}/\text{Mg}_2^{+}$ -free PBS and placed in 3  $\mu\text{l}$  of lysis buffer containing 5 mM Tris-HCl, pH  
46 7.5 (Sigma-Aldrich); 0.1% Tween-20 (Sigma-Aldrich); 50 mM KCl (Sigma-Aldrich) and 2.5 units of  
47 RiboLock RNase inhibitor (Thermo Fisher Scientific). The samples were stored at -80°C. After thawing the  
48 samples, 1  $\mu\text{l}$  of 1:3 diluted 3' SR Adapter (NEB), 1  $\mu\text{l}$  of 0.5 M KCl, 1  $\mu\text{l}$  of 20  $\mu\text{M}$  5S and 5.8S rRNA  
49 masking oligo mixture, and 1  $\mu\text{l}$  of nuclease-free water was added to each sample. The samples were incubated  
50 in a preheated thermal cycler at 90°C for 1 min, followed by a 2-minute incubation at 60°C to mask the  
51 ribosomal RNA (rRNA). The samples were transferred on ice. 3  $\mu\text{l}$  of 3' ligation enzyme mix (NEB) and 10

52  $\mu$ l of 3' adapter ligation reaction buffer (NEB) was added on each sample. The samples were briefly vortexed  
 53 and centrifuged before incubation in thermal cycler at 25°C for 60 min. After incubation, 4.5  $\mu$ l of nuclease-  
 54 free water and 1  $\mu$ l of 1:3 diluted SR RT Primer (NEB) were added to each sample. The libraries were incubated  
 55 at 75°C for 5 min, followed by incubations at 37°C for 15 min and at 25°C for 15 min. During the final  
 56 incubation step, 5' SR adapter (NEB) was re-suspended in nuclease-free water. 1:3 diluted adapter was  
 57 denaturated by incubation in thermal cycler, at 70°C, for 2 min and then immediately placed on ice.  
 58 Denaturated adapter was used within 30 mins. One microliter of denatured 5' SR adapter (NEB), 1  $\mu$ l of 10 $\times$   
 59 ligation reaction buffer (NEB), and 2.5  $\mu$ l of 5' ligase enzyme mix (NEB) were added in each sample. The  
 60 samples were briefly vortexed, centrifuged, and incubated in thermal cycler, at 25°C for 60 mins. After  
 61 incubation, 8  $\mu$ l of First Strand Synthesis buffer (NEB), 1  $\mu$ l of Murine RNase inhibitor (NEB), and 1  $\mu$ l of  
 62 ProtoScript II Reverse Transcriptase (NEB) were added to the samples. The libraries were incubated at 50°C  
 63 for 60 min. The enzyme was inactivated at 75°C for 10 min. The cDNA pool (40  $\mu$ l) was purified using  
 64 NucleoSpin Gel and PCR Clean up Columns for gel extraction and PCR clean up (Macherey-Nagel) according  
 65 to PCR product purification protocol and eluted finally in 30  $\mu$ l elution buffer. 30  $\mu$ l 2 $\times$  Phusion Hot MasterMix  
 66 (Thermo Fisher Scientific) and 1  $\mu$ l of each 100  $\mu$ M primer, universal primer and barcoded primer where  
 67 NNNNNN is 6 bp specific index sequences in multiplex assay, were added to purified cDNA mixture. All  
 68 oligonucleotides were desalted. Following PCR was carried out under following conditions: initial  
 69 denaturation and activation 1 min at 98°C, cycle denaturation 10 s at 98°C, annealing 20 s at 62°C, extension  
 70 5 s at 70°C and final extension 5 min at 72°C. In total 19 cycles were performed. The PCR product (80  $\mu$ l) was  
 71 purified using NucleoSpin Gel and PCR Clean up Columns for gel extraction and PCR clean up (Macherey-  
 72 Nagel) according to PCR product purification protocol and eluted finally in 25  $\mu$ l elution buffer. Small PCR  
 73 fragments were removed by adding 28  $\mu$ l AMPureXP beads (Beckman), mixed well and incubated 10 min at  
 74 room temperature. Beads were captured by magnet and supernatant was completely removed. The pellet was  
 75 resuspended in 30  $\mu$ l nuclease-free water and placed back on magnet. Clear supernatant, ready sRNA library,  
 76 was transferred to a clean tube. The library was quantified by KAPA SYBR FAST qPCR kit (Roche) according  
 77 to instructions. The sRNA library was sequenced using Illumina MiSeq (Illumina) instrument with read-1  
 78 primer for 50 bp and index primer for 6 bp. The oligo and primer sequences are listed in Supplemental Table  
 79 S7.

80 **Supplemental Table S7. Summary of primer and oligo sequences.**

| Name                   | Sequence (5'-3')                                                       | Vendor                       |
|------------------------|------------------------------------------------------------------------|------------------------------|
| 5S RNA masking oligo   | ATCGGCAAAGCCTACAGCACCCGGTATTCCCAGG-biotin                              | Metabion<br>International AG |
| 5.8S RNA masking oligo | ATCGGCAAAGCCTACAGCACCCGGTATTCCCAGG-biotin                              | Metabion                     |
| universal primer       | AATGATACGGCGACCACCGAGATCTACACGTTTCAGAGTTC<br>TACAGTCCGACGA             | Metabion                     |
| barcoded primer        | CAAGCAGAAGACGGCATAACGAGATNNNNNNGTGACTGGA<br>GTTTCAGACGTGTGCTCTTCCGATCT | Metabion                     |
| read-1 primer          | GATCTACACGTTTCAGAGTTCTACAGTCCGACGATC                                   | Sigma-Aldrich                |
| index primer           | GATCGGAAGAGCACACGTCTGAACTCCAGTCAC                                      | Sigma-Aldrich                |

81

82 **Pre-processing of sRNA-seq data**

83 The pre-processing of the raw sRNA-seq reads and the expression profiling of sRNAs was performed using  
84 sRNAbench (Aparicio-Puerta et al. 2019; Rueda et al. 2015). Sequence reads that contained at least the first  
85 10 nucleotides (nt) of the adapter sequence (AGATCGGAAGAGCACACGTCT) were adapter trimmed and  
86 kept. Adapter trimmed reads of sizes 17 to 30 nt were used for the expression profiling. We used the genome  
87 mode approach in sRNAbench for expression profiling (Rueda et al. 2015). Briefly, the pre-processed reads  
88 were aligned using Bowtie (Langmead et al. 2009) to the human genome (GRCh38, primary assembly from  
89 Ensembl) allowing one mismatch to determine genomic coordinates for the aligned reads, and further mapped  
90 in a hierarchical manner to the following databases: human miRBase (v22) (Kozomara et al. 2018), Ensembl  
91 cDNA (hg38), Ensembl non-coding RNA (hg38), RNACentral version 14 (hg38), and oocyte short piwi-  
92 interacting RNAs (piRNAs; os-piRNA) (Yang et al. 2019). Reads were assigned to target reference RNAs  
93 only if they align to the reference RNAs and their genomic coordinates lie completely within the genomic

94 coordinates of their target reference RNA. The remaining unassigned reads of length 17 to 25 nt were aligned  
95 to the human genome (GRCh38) for detection of novel microRNAs (miRNAs). To evaluate the distribution of  
96 the detected miRNAs, conventional piRNAs, and os-piRNAs across genomic elements, their genomic  
97 coordinates were gathered into bed format. For miRNAs and conventional piRNAs these were obtained  
98 directly from the miRBase and RNAcentral databases respectively, while for os-piRNAs, genomic coordinates  
99 were determined from the alignment genomic coordinates of sequence reads that aligned to the genome and  
100 were assigned to os-piRNAs by sRNAbench. The coordinates of these sRNAs were then intersected with  
101 GENCODE hg38 annotations (in bedfiles) of coding and noncoding gene elements obtained from UCSC's  
102 table browser (Comprehensive gene annotation v23, after filtering for coding and noncoding by Transcript  
103 class). Intersection was performed with BEDTools 2.29.0 (Quinlan and Hall 2010) and sRNAs were assigned  
104 to one of 6 genomic elements in a successive manner from coding CDS, 5'-UTR, 3'-UTR, intron, and  
105 noncoding exon and intron resembling analyses by Yang et al. 2019. In each step only the remaining sRNAs  
106 were used in the next step, and with priority of sense over antisense. The remaining sRNAs not assigned to the  
107 six gene elements were considered intergenic. To assess the distribution of the intergenic sRNAs in repetitive  
108 elements and their flanking regions, similar analyses was performed by intersecting the intergenic sRNAs with  
109 repetitive elements downloaded from UCSC, and their flanking regions of 0-1kb and 1-2kb calculated with  
110 BEDTools. Intergenic sRNAs overlapping with LINE, LTR, SINE, DNA, and other repeats were determined  
111 after which the remaining sRNAs were assigned to flanking regions in LINE-FL1k, LTR-FL1k, SINE-FL1k,  
112 DNA-FL1k, other repeat-FL1k and successively in LINE-FL2k, LTR-FL2k, SINE-FL2k, DNA-FL2k, and  
113 other repeat-FL2k.

#### 114 **Differential expression analyses**

115 Several samples included in the study were genetically related due to being donated by the same individual or  
116 couple. To account for sample relatedness, we utilized R package MACAU 2.0 v1.10 (Sun et al. 2017) in DE  
117 analysis of miRNAs and miRNA modification isoforms (isomiRs). Oocytes ( $n=12$ ) were compared to embryos  
118 ( $n=10$ ) using the Poisson mixed model with filtering set to "TRUE" in MACAU 2.0. We required each  
119 miRNA/isomiR to have > 1 reads in at least 5 samples after adding a pseudocount of 1 to be included in the  
120 analysis. Phenotypes were coded as 0 and 1 (0, oocytes; 1, embryos) and sequencing batch information was

121 provided as a covariate (batch 1;  $n=6$ , batch 2;  $n=16$ ). The model incorporated relatedness matrix was  
122 construct, by assigning the value 0.5 to samples originating from the same donor/donor couple and 0 to samples  
123 from different individuals. Expression changes were regarded as significant when  $FDR < 0.05$ , while no cut-  
124 off was applied for the effect size ( $\beta$ ) or the heritability ( $h^2$ ) term. miRNA modification ratio differences  
125 between oocytes and embryos were determined using a linear model with the modification ratio as the response  
126 variable and batch and phenotype as the explanatory variables. Phenotypes and batch were coded as before. A  
127 linear mixed random effects model with a random effect term to account for sample relatedness could not be  
128 used due to lack of convergence. P-values for the phenotype variable were extracted from each model and  
129 adjusted for multiple testing using the Benjamini–Hochberg method (Benjamini and Hochberg 1995).  
130 Modifications with  $FDR < 0.05$  were regarded as differentially expressed.

### 131 **Novel miRNAs**

132 We predicted novel miRNAs with miRDeep2 v0.1.2 (Friedländer et al. 2012) and sRNAbench (Aparicio-  
133 Puerta et al. 2019; Rueda et al. 2015). Detection of novel miRNAs was performed using unassigned, pre-  
134 processed reads that were 17 to 25 nt long. For miRDeep2, reads from different samples were combined for  
135 greatest prediction sensitivity. Mature human miRNA and hairpin sequences from miRBase v22 were provided  
136 to detect reads mapping to known miRNAs. Mature miRNAs of all other available species were used to detect  
137 novel miRNAs with annotated miRNA homologs in other species. We required a  $>90\%$  overlap of pre-miRNA  
138 coordinate predictions by both software and expression of putative miRNA and/or star sequence in  $>1$  sample  
139 with  $>0$  reads assigned by sRNAbench. The novel (pre-)miRNA candidates were further investigated for their  
140 confidence based on miRBase high confidence criteria (Kozomara and Griffiths-Jones 2014) and additional  
141 quality criteria stated in Fromm et al. (2015).

### 142 **Human oocyte and pre-implantation embryo mRNA expression data**

143 Previously published human oocyte and embryo RNA-seq data (Yan et al. 2013) was used to analyse gene  
144 expression changes between the different developmental stages using pairwise, two-sided Wilcoxon rank sum  
145 tests. Expression differences between miRNA 3' adenylyating and uridylyating genes were assessed using

146 pairwise, paired, two-sided Wilcoxon signed rank tests. P-values were adjusted for multiple testing using the  
147 Benjamini–Hochberg method (Benjamini and Hochberg 1995) and expression changes with  $FDR < 0.05$  were  
148 regarded as significant. The RPKM normalised gene expression values from the Yan et al. 2013 (Yan et al.  
149 2013) data set were downloaded from the article web-site.

150

151

152 **Supplemental Methods References**

- 153 Aparicio-Puerta E, Lebrón R, Rueda A, Gómez-Martín C, Giannoukakos S, Jaspez D, Medina JM, Zubkovic  
154 A, Jurak I, Fromm B, et al. 2019. sRNAbench and sRNAtoolbox 2019: intuitive fast small RNA  
155 profiling and differential expression. *Nucleic Acids Res* **47**: W530–W535.  
156 <https://pubmed.ncbi.nlm.nih.gov/31114926>.
- 157 Benjamini Y, Hochberg Y. 1995. Controlling the False Discovery Rate: A Practical and Powerful Approach  
158 to Multiple Testing. *J R Stat Soc Ser B* **57**: 289–300. [https://doi.org/10.1111/j.2517-](https://doi.org/10.1111/j.2517-6161.1995.tb02031.x)  
159 [6161.1995.tb02031.x](https://doi.org/10.1111/j.2517-6161.1995.tb02031.x).
- 160 Friedländer MR, Mackowiak SD, Li N, Chen W, Rajewsky N. 2012. miRDeep2 accurately identifies known  
161 and hundreds of novel microRNA genes in seven animal clades. *Nucleic Acids Res* **40**: 37–52.  
162 <https://pubmed.ncbi.nlm.nih.gov/21911355>.
- 163 Fromm B, Billipp T, Peck LE, Johansen M, Tarver JE, King BL, Newcomb JM, Sempere LF, Flatmark K,  
164 Hovig E, et al. 2015. A Uniform System for the Annotation of Vertebrate microRNA Genes and the  
165 Evolution of the Human microRNAome. *Annu Rev Genet* **49**: 213–242.  
166 <https://pubmed.ncbi.nlm.nih.gov/26473382>.
- 167 Kozomara A, Birgaoanu M, Griffiths-Jones S. 2018. miRBase: from microRNA sequences to function.  
168 *Nucleic Acids Res* **47**: D155–D162. <https://doi.org/10.1093/nar/gky1141>.
- 169 Kozomara A, Griffiths-Jones S. 2014. miRBase: annotating high confidence microRNAs using deep  
170 sequencing data. *Nucleic Acids Res* **42**: D68–D73. <https://pubmed.ncbi.nlm.nih.gov/24275495>.
- 171 Langmead B, Trapnell C, Pop M, Salzberg SL. 2009. Ultrafast and memory-efficient alignment of short  
172 DNA sequences to the human genome. *Genome Biol* **10**: R25. [https://doi.org/10.1186/gb-2009-10-3-](https://doi.org/10.1186/gb-2009-10-3-r25)  
173 [r25](https://doi.org/10.1186/gb-2009-10-3-r25).
- 174 Quinlan AR, Hall IM. 2010. BEDTools: a flexible suite of utilities for comparing genomic features.  
175 *Bioinformatics* **26**: 841–842. <https://pubmed.ncbi.nlm.nih.gov/20110278>.
- 176 Rueda A, Barturen G, Lebrón R, Gómez-Martín C, Alganza Á, Oliver JL, Hackenberg M. 2015.  
177 sRNAtoolbox: an integrated collection of small RNA research tools. *Nucleic Acids Res* **43**: W467–



178 W473. <https://pubmed.ncbi.nlm.nih.gov/26019179>.

179 Sun S, Hood M, Scott L, Peng Q, Mukherjee S, Tung J, Zhou X. 2017. Differential expression analysis for  
180 RNAseq using Poisson mixed models. *Nucleic Acids Res* **45**: e106.  
181 <http://www.ncbi.nlm.nih.gov/pubmed/28369632>.

182 Yan L, Yang M, Guo H, Yang L, Wu J, Li R, Liu P, Lian Y, Zheng X, Yan J, et al. 2013. Single-cell RNA-  
183 Seq profiling of human preimplantation embryos and embryonic stem cells. *Nat Struct Mol Biol* **20**:  
184 1131–1139. <http://dx.doi.org/10.1038/nsmb.2660>.

185 Yang Q, Li R, Lyu Q, Hou L, Liu Z, Sun Q, Liu M, Shi H, Xu B, Yin M, et al. 2019. Single-cell CAS-seq  
186 reveals a class of short PIWI-interacting RNAs in human oocytes. *Nat Commun* **10**: 3389.  
187 <https://doi.org/10.1038/s41467-019-11312-8>.

188

189
