# Supplementary material for: Small RNA expression and miRNA modification dynamics in human oocytes and early embryos
Source: HighWire-hosted journal article supplement (doi:10.1101/gr.268193.120), 2021-08-01
Supplement: Supplemental_Tables.xlsx [file Supplemental_Tables.xlsx]

## Sheet: Supplemental Table S2
Supplemental Table S2. microRNA expression matrix.
# Number of reads mapped to each microRNA species in human oocytes, zygotes, and early embryos.
# Samples are placed in columns with sample stage and sample number indicated. Germinal vesicle oocyte, GV; Metaphase I oocyte, MI; Metaphase II oocyte, MII; zygote, Z; 4-cell embryo, 4C; 8-cell embryo, 8C.
miRNA	GV1	GV2	GV3	GV4	GV5	GV6	MI1	MI2	MI3	MII1	MII2	MII3	Z1	Z2	Z3	Z4	Z5	4C1	4C2	4C3	4C4	4C5	8C1	8C2	8C3	8C4	8C5
hsa-let-7a-3p	0	0	0	0	0	0	0	0	0	0	0	0	0	0	0	0	0	0	0	0	0	0	14	0	0	0	0
hsa-let-7a-5p	26	9	0	0	0	0	16	0	32	41	2	0	14	8	0	0	0	22	52	0	0	0	65	0	15	17	12
hsa-let-7b-5p	14	21	0	28	0	25	15	0	0	21	0	0	0	14	13	10	0	25	15	14	0	0	9	31	0	10	8
hsa-let-7c-5p	9	13	0	0	0	0	0	0	0	14	0	0	0	0	0	0	0	0	0	0	0	9	0	18	0	0	0
hsa-let-7d-3p	0	0	0	0	0	0	0	0	0	36	0	0	0	0	0	0	0	0	0	0	0	0	0	0	0	20	0
hsa-let-7e-5p	27	15	0	0	0	15	0	0	0	0	0	0	0	0	0	0	0	0	13	0	0	0	41	0	15	0	0
hsa-let-7f-5p	91	49	15	0	1	13	29	0	35	28	13	53	0	88	0	0	26	167	53	1	16	37	68	14	0	16	13
hsa-let-7g-5p	26	16	0	0	0	4	0	0	0	30	0	0	0	0	0	0	0	0	25	0	0	0	17	0	0	0	0
hsa-let-7i-5p	15	9	0	0	45	25	10	0	0	0	2	32	14	0	16	0	13	0	15	14	7	0	0	0	0	13	0
hsa-miR-1-3p	0	0	0	0	0	0	0	0	13	30	0	0	13	0	0	0	0	0	8	0	0	0	17	0	0	0	0
hsa-miR-100-5p	175	69	0	13	28	42	54	0	24	78	51	38	33	26	35	39	86	391	117	24	44	41	159	0	0	29	0
hsa-miR-101-3p	467	453	64	157	103	84	387	39	167	265	172	123	479	838	180	182	316	1384	662	147	30	89	679	201	0	88	154
hsa-miR-10395-3p	12	43	0	0	0	0	0	0	0	0	0	0	6	0	0	0	0	107	21	0	0	0	31	14	0	0	0
hsa-miR-103a-3p	0	0	12	0	31	0	0	0	0	0	0	0	0	0	20	0	0	0	0	0	0	0	18	0	0	0	17
hsa-miR-10400-5p	0	5	0	0	0	0	0	0	0	0	0	0	0	0	0	0	0	0	0	1	0	0	0	0	0	0	0
hsa-miR-105-5p	0	0	0	0	0	0	0	0	0	0	0	0	0	0	0	0	0	0	0	0	0	0	19	0	0	0	0
hsa-miR-106a-5p	0	1	0	0	0	0	1	0	0	1	0	0	0	1	0	0	0	0	0	0	0	0	35	0	0	0	0
hsa-miR-106b-3p	0	0	0	0	0	0	0	0	0	0	0	0	0	0	0	0	0	0	0	0	14	0	17	21	0	0	0
hsa-miR-106b-5p	0	0	0	0	0	0	16	0	0	0	0	0	0	0	2	0	0	0	12	0	0	0	0	0	0	0	21
hsa-miR-107	0	0	0	0	0	0	0	0	0	0	0	0	16	0	0	0	0	0	0	0	0	0	0	0	0	0	0
hsa-miR-10a-5p	0	0	0	0	0	0	0	0	0	0	0	0	0	0	1	0	0	38	110	0	8	0	241	0	0	0	0
hsa-miR-10b-5p	21	25	0	0	0	11	0	0	0	21	0	0	0	38	0	18	25	59	155	0	20	0	353	10	0	47	0
hsa-miR-1180-3p	0	0	0	0	0	12	3	0	0	21	0	25	0	1	20	0	0	35	0	0	0	0	8	16	0	0	0
hsa-miR-12135	0	0	0	0	0	0	18	0	0	20	0	0	0	0	0	0	0	0	0	0	0	0	0	0	0	0	0
hsa-miR-12136	12	37	0	14	31	0	0	0	0	15	0	0	59	24	0	0	0	233	33	0	0	0	19	0	0	0	0
hsa-miR-122-5p	0	0	0	0	0	0	0	0	0	0	0	0	0	0	0	0	0	0	0	0	0	0	17	0	0	12	0
hsa-miR-1226-3p	7	0	0	0	0	0	0	0	0	0	0	0	0	0	0	0	0	0	0	0	0	0	0	0	0	0	0
hsa-miR-1226-5p	0	9	0	0	0	0	0	0	0	0	0	0	0	0	0	0	0	0	0	0	0	0	0	0	0	0	0
hsa-miR-1229-3p	0	9	0	0	0	52	17	0	15	0	0	0	0	0	18	0	15	38	12	0	0	0	27	15	0	0	0
hsa-miR-122b-3p	0	0	0	0	0	0	0	0	0	0	0	0	0	0	0	0	0	0	9	0	0	0	0	0	0	0	0
hsa-miR-122b-5p	0	0	0	0	0	0	0	0	0	0	0	0	19	0	0	0	0	47	4	0	23	0	0	0	0	0	0
hsa-miR-1244	14	0	0	0	0	0	0	0	0	0	0	0	13	30	0	0	0	0	0	0	0	0	0	0	0	0	0
hsa-miR-1246	0	0	0	0	0	0	0	0	0	0	0	0	0	1	0	0	0	2	0	0	0	0	2	0	0	0	0
hsa-miR-1248	0	0	0	0	0	0	0	0	0	0	0	0	9	0	0	0	0	0	0	0	0	0	29	0	0	0	0
hsa-miR-1249-3p	0	0	0	0	0	0	0	0	0	1	0	0	0	0	0	0	0	0	0	0	0	0	0	0	0	0	0
hsa-miR-1255a	0	0	0	0	0	0	0	0	0	0	0	0	0	0	0	0	0	0	0	0	0	0	81	0	24	0	0
hsa-miR-125a-5p	9	32	0	10	0	33	5	21	0	0	0	0	13	12	0	0	0	86	0	23	0	0	79	0	0	0	0
hsa-miR-125b-2-3p	34	0	0	0	0	0	0	0	0	0	0	0	0	0	0	0	0	9	0	0	0	0	15	0	0	0	0
hsa-miR-125b-5p	16	15	0	17	26	40	23	0	0	0	0	25	29	26	0	0	0	55	41	10	15	26	69	0	11	0	11
hsa-miR-126-3p	0	7	4	0	9	0	54	0	75	0	14	5	0	21	49	43	57	32	32	0	0	13	0	13	17	32	45
hsa-miR-1260a	0	6	0	0	0	0	0	0	0	0	0	8	0	24	0	16	0	0	0	19	0	0	0	0	15	15	36
hsa-miR-1260b	0	0	0	0	0	0	0	0	0	0	0	0	0	0	7	0	0	0	0	0	0	0	35	0	0	0	0
hsa-miR-1262	0	0	0	0	0	0	0	0	0	0	0	0	0	21	0	0	0	0	0	0	0	0	14	0	0	0	0
hsa-miR-1263	0	21	0	0	0	0	17	0	0	0	0	0	0	11	21	0	0	12	0	0	0	0	0	0	0	0	0
hsa-miR-127-3p	0	0	0	0	0	0	0	0	0	0	0	0	0	0	0	0	0	0	0	0	0	0	1	0	0	0	0
hsa-miR-127-5p	0	0	0	0	1	0	0	0	0	1	0	0	0	0	0	0	0	0	0	0	0	0	0	0	0	0	0
hsa-miR-1273h-3p	0	0	0	0	0	0	0	0	0	0	0	0	0	0	0	0	0	0	0	0	0	0	13	0	0	0	16
hsa-miR-1276	0	0	0	0	0	0	0	0	0	0	0	0	0	0	0	0	0	0	0	0	0	0	22	0	0	0	0
hsa-miR-1278	0	0	0	0	0	0	0	0	0	0	23	0	0	32	19	0	0	0	0	0	0	0	22	18	19	0	0
hsa-miR-128-3p	90	63	0	66	32	59	173	23	62	90	78	116	130	53	244	77	133	192	149	63	148	107	534	86	92	34	44
hsa-miR-1283	0	0	0	0	21	0	16	0	0	0	0	0	0	0	0	15	0	0	0	0	0	0	18	15	0	0	0
hsa-miR-1284	0	0	0	0	0	0	0	0	0	0	0	0	0	0	0	0	0	13	0	0	0	0	0	0	0	0	0
hsa-miR-129-5p	0	0	0	0	0	0	0	0	0	0	0	0	0	0	0	0	0	73	80	0	0	21	39	0	15	0	0
hsa-miR-1290	0	1	0	0	0	0	0	0	0	0	0	0	0	0	0	0	0	0	0	0	0	0	0	0	0	0	0
hsa-miR-1291	11	13	0	0	0	3	0	0	0	0	17	0	16	0	0	0	0	0	0	0	0	0	0	0	0	0	0
hsa-miR-1295a	29	0	0	11	0	0	75	0	0	15	0	52	0	11	0	0	0	0	0	0	0	0	55	0	0	0	9
hsa-miR-1296-5p	0	0	0	0	0	0	0	0	0	0	0	0	16	0	0	0	0	0	0	0	0	0	0	0	0	0	0
hsa-miR-1298-5p	215	51	11	117	120	72	59	0	11	105	125	139	184	271	118	39	41	119	46	0	0	16	0	19	0	0	4
hsa-miR-1307-3p	0	0	0	13	0	0	0	0	0	0	0	0	0	0	9	0	0	0	42	0	0	12	200	98	16	20	14
hsa-miR-1307-5p	0	0	0	0	0	0	0	0	0	0	0	0	14	0	0	0	0	0	0	0	0	0	0	0	0	0	0
hsa-miR-130b-5p	9	0	0	0	0	21	35	0	0	0	7	0	34	18	24	0	0	0	0	0	0	0	72	0	0	0	12
hsa-miR-132-3p	0	0	20	25	0	0	0	0	0	0	20	0	17	0	0	0	20	0	0	18	0	0	21	0	0	0	0
hsa-miR-132-5p	0	0	42	20	18	29	57	0	24	0	0	26	11	34	72	0	16	54	0	49	42	19	115	1	0	0	21
hsa-miR-1323	15	58	0	43	21	0	50	10	0	27	17	39	22	26	30	11	62	86	0	0	31	0	168	0	33	20	58
hsa-miR-134-5p	0	0	0	0	0	0	0	0	0	0	0	0	0	0	0	0	0	7	0	0	0	0	19	0	0	0	0
hsa-miR-135b-5p	0	0	0	0	0	0	0	0	0	0	0	0	0	0	0	0	0	0	0	0	0	0	25	0	0	0	0
hsa-miR-138-5p	0	0	0	4	0	0	0	0	0	0	0	0	0	0	0	0	0	0	0	0	0	0	0	0	0	0	0
hsa-miR-139-3p	0	0	0	0	0	0	0	0	0	0	0	0	0	0	0	0	0	0	0	0	0	0	14	0	0	0	0
hsa-miR-139-5p	0	0	0	0	0	0	0	0	0	0	0	0	0	0	0	0	0	0	4	0	0	0	26	0	0	0	0
hsa-miR-140-3p	84	33	0	0	88	0	18	0	0	12	0	26	12	17	0	0	18	98	46	0	0	0	10	18	0	0	0
hsa-miR-140-5p	0	0	0	5	0	0	0	0	0	0	0	0	12	0	0	0	21	0	23	0	0	0	0	14	0	0	0
hsa-miR-141-5p	0	0	0	0	0	0	0	0	0	0	0	0	0	0	0	0	23	0	0	0	0	0	0	0	0	0	0
hsa-miR-142-5p	0	0	0	0	0	0	0	0	0	13	0	0	0	0	0	0	0	0	0	0	0	0	0	0	0	0	0
hsa-miR-143-3p	40	0	0	0	0	0	0	0	0	0	0	0	0	0	0	0	21	14	0	0	0	0	9	0	0	23	0
hsa-miR-146a-5p	38	31	0	53	61	0	15	8	0	54	10	60	9	72	29	48	2	82	46	16	15	0	54	25	0	0	0
hsa-miR-146b-3p	0	0	0	0	0	0	0	0	0	0	0	0	0	0	0	0	0	0	26	0	0	13	0	0	0	0	0
hsa-miR-146b-5p	22	66	0	0	0	0	0	0	0	19	0	22	0	12	0	0	37	202	332	19	21	0	681	54	10	0	4
hsa-miR-148a-3p	2268	1216	1061	2133	1365	1375	3918	257	2438	3994	3234	2670	1147	1672	2836	1836	2447	5244	2727	1225	1354	808	6106	2329	971	1685	2584
hsa-miR-148a-5p	0	0	0	0	0	0	18	0	15	0	0	0	0	0	0	0	0	19	0	0	24	0	24	0	0	0	6
hsa-miR-148b-3p	0	0	0	0	0	0	0	0	0	0	0	0	0	0	0	0	14	18	19	0	0	0	50	18	0	0	0
hsa-miR-149-5p	10	20	2	0	73	0	0	0	6	0	19	36	6	17	5	0	0	0	0	0	10	0	0	0	0	0	0
hsa-miR-151a-3p	967	410	199	821	615	385	1255	114	813	617	513	558	925	1213	501	532	607	1534	1075	410	416	318	963	147	165	250	313
hsa-miR-151a-5p	28	28	0	0	0	0	13	0	0	59	0	20	62	17	0	0	16	37	0	35	0	0	33	40	0	0	0
hsa-miR-151b	0	0	0	0	0	0	0	0	0	0	0	0	0	0	0	0	0	0	0	1	0	0	0	0	0	0	0
hsa-miR-152-3p	8	0	0	0	0	0	0	12	0	0	0	0	14	0	0	0	0	0	0	8	0	0	46	0	0	15	0
hsa-miR-153-3p	0	0	0	0	0	0	12	0	0	0	0	0	11	0	0	0	0	0	0	0	0	0	0	0	0	0	0
hsa-miR-155-5p	0	0	0	42	20	55	84	22	15	70	71	20	0	0	57	0	24	0	17	83	23	75	0	0	48	18	28
hsa-miR-15a-5p	0	0	0	0	0	0	0	0	0	0	0	0	0	0	0	0	0	0	0	0	0	0	23	0	0	0	0
hsa-miR-15b-3p	0	22	0	0	0	0	0	0	0	0	0	0	0	0	0	0	0	0	0	0	0	0	0	0	0	0	0
hsa-miR-16-2-3p	155	112	50	18	76	0	154	8	44	76	91	30	177	142	144	148	117	335	156	52	72	0	386	90	87	12	91
hsa-miR-16-5p	39	12	0	21	40	16	57	24	50	99	39	37	0	0	40	0	44	41	0	0	0	0	32	0	34	0	2
hsa-miR-17-3p	0	0	0	0	0	0	0	0	0	0	0	0	0	0	0	0	0	0	0	0	0	0	0	0	0	0	10
hsa-miR-17-5p	10	22	6	0	0	0	69	0	0	0	0	15	56	22	0	52	17	48	0	14	0	24	47	0	14	0	0
hsa-miR-181a-2-3p	0	12	0	0	0	0	0	0	0	0	0	0	0	0	0	0	14	0	0	0	0	0	0	0	0	0	0
hsa-miR-181a-5p	0	0	0	18	0	0	0	0	0	0	0	0	0	0	0	0	0	0	0	0	16	0	20	0	0	0	0
hsa-miR-182-3p	0	0	0	0	0	0	0	0	0	0	0	0	0	0	0	0	0	17	0	0	0	0	0	0	0	0	0
hsa-miR-182-5p	254	221	24	150	47	77	310	0	74	144	140	157	216	339	147	25	106	505	328	93	17	50	284	54	0	81	115
hsa-miR-183-5p	103	86	11	42	29	0	139	12	27	43	70	99	135	114	39	54	83	455	496	56	54	35	1234	361	80	53	73
hsa-miR-184	1337	641	206	342	623	266	719	165	677	692	590	573	1001	1609	406	563	738	1427	931	187	304	44	1844	282	99	280	184
hsa-miR-1843	0	0	0	14	0	0	0	0	0	0	0	0	0	0	0	0	0	0	0	0	0	0	0	0	0	0	0
hsa-miR-186-5p	0	0	0	2	0	0	0	0	0	0	0	0	18	0	0	0	0	18	0	0	0	0	0	0	0	0	0
hsa-miR-188-5p	0	16	0	0	0	0	0	0	0	0	0	0	0	0	0	0	0	0	0	0	0	0	0	0	0	0	0
hsa-miR-18a-3p	0	0	0	16	0	0	16	0	0	0	0	0	0	0	0	0	0	17	0	0	0	0	0	0	0	0	17
hsa-miR-18a-5p	0	0	0	0	0	0	0	0	18	0	0	0	0	0	0	0	0	0	0	0	0	0	0	0	0	0	0
hsa-miR-191-3p	0	0	0	0	0	0	3	0	0	0	0	0	0	0	0	0	0	0	13	13	0	0	14	0	0	0	0
hsa-miR-191-5p	114	0	28	103	62	21	190	0	14	87	0	122	37	81	31	39	32	237	104	53	86	41	510	135	0	111	36
hsa-miR-1910-5p	0	0	0	0	0	0	0	0	0	0	0	0	0	0	0	0	0	0	0	0	0	23	0	0	0	0	0
hsa-miR-1911-5p	0	0	0	0	0	0	0	0	0	0	0	6	0	0	0	0	0	0	0	0	0	0	0	0	0	0	0
hsa-miR-1912-5p	0	0	0	0	0	0	0	0	0	0	0	0	0	0	0	0	0	0	0	0	0	0	9	0	0	0	0
hsa-miR-1914-3p	0	0	0	0	0	0	0	0	0	0	0	0	0	0	0	0	0	0	0	0	0	0	0	0	0	0	13
hsa-miR-192-5p	559	551	191	359	658	378	714	146	641	965	403	342	1104	1427	251	263	417	1136	570	355	288	230	2286	387	65	275	229
hsa-miR-193a-5p	0	0	0	0	0	0	0	0	0	0	17	0	7	0	0	0	7	0	0	0	0	0	7	23	0	0	0
hsa-miR-194-3p	0	0	0	0	0	0	0	0	0	0	0	0	0	0	0	0	0	0	0	0	0	0	0	0	0	0	11
hsa-miR-194-5p	0	17	0	0	0	19	0	0	0	0	17	0	0	17	0	16	0	15	0	0	0	0	11	0	0	0	0
hsa-miR-195-3p	37	50	11	0	0	0	125	0	42	19	0	0	61	19	0	0	0	48	18	12	0	0	78	0	0	0	0
hsa-miR-195-5p	12	44	0	39	0	0	24	0	0	80	0	0	0	0	64	0	0	20	0	0	28	0	22	0	0	37	0
hsa-miR-196a-5p	0	0	0	0	0	0	0	0	0	0	0	0	0	17	17	0	0	49	59	0	7	25	77	0	0	0	0
hsa-miR-19a-3p	0	0	0	0	0	0	0	0	0	0	17	0	0	0	0	0	0	0	0	0	0	0	0	0	0	13	27
hsa-miR-19b-3p	7	0	0	0	0	0	0	17	0	0	11	19	14	0	25	0	14	0	0	14	11	0	0	0	0	0	0
hsa-miR-200b-3p	0	0	0	0	0	0	0	0	0	0	0	0	10	35	0	0	0	18	17	0	0	20	37	0	20	0	0
hsa-miR-200c-3p	0	0	0	16	0	0	0	0	0	0	0	0	0	0	0	0	0	0	0	15	0	0	20	0	0	0	0
hsa-miR-202-3p	23	0	0	0	0	0	14	0	0	0	0	0	0	0	0	0	8	0	11	0	0	0	49	0	0	0	0
hsa-miR-202-5p	18	46	15	0	0	4	0	21	0	0	0	0	0	0	0	13	0	0	12	0	0	0	2	0	0	0	0
hsa-miR-203a-3p	37	0	0	0	17	0	19	0	0	13	0	0	13	14	0	10	0	19	0	0	16	0	28	0	0	0	0
hsa-miR-204-5p	37	9	28	50	50	29	202	31	54	136	28	95	135	125	52	30	64	137	106	17	25	55	113	15	16	0	28
hsa-miR-205-5p	0	0	0	0	0	0	0	0	0	0	0	0	10	0	0	0	0	0	0	0	0	0	0	0	0	0	0
hsa-miR-206	0	0	0	0	0	0	0	0	0	0	0	0	15	0	0	0	0	0	0	0	0	0	0	0	0	0	0
hsa-miR-20a-5p	87	94	1	113	138	75	183	45	124	189	92	175	104	116	128	73	161	234	19	116	20	49	272	111	0	157	141
hsa-miR-21-5p	2352	3371	148	133	269	424	215	119	136	210	27	150	432	791	73	57	257	3187	2046	306	108	30	3025	1723	74	101	158
hsa-miR-210-3p	0	0	0	0	0	0	0	0	0	0	0	0	0	0	0	0	0	0	0	0	0	0	0	6	0	0	0
hsa-miR-2113	0	0	0	0	0	0	0	0	0	0	0	0	0	0	0	0	0	22	39	0	0	17	51	0	0	0	0
hsa-miR-2115-3p	0	0	0	0	0	0	0	0	0	0	0	0	0	0	0	0	0	23	0	0	0	0	0	0	0	0	0
hsa-miR-212-5p	21	0	0	0	0	0	0	0	0	0	0	0	0	0	18	0	0	0	8	0	0	0	47	0	0	0	0
hsa-miR-215-5p	1	0	0	1	1	0	1	0	1	2	1	1	4	3	0	0	0	2	0	0	1	0	7	3	0	0	14
hsa-miR-218-5p	17	47	12	41	108	62	214	36	167	356	78	71	157	163	119	154	243	305	125	191	100	71	294	54	53	42	80
hsa-miR-219a-1-3p	0	0	0	0	0	0	0	0	0	0	0	0	0	0	0	0	0	0	0	15	0	0	0	0	0	0	0
hsa-miR-219a-2-3p	0	0	0	0	0	0	0	0	0	0	0	0	0	0	0	0	0	26	0	0	0	0	0	0	0	0	0
hsa-miR-219b-3p	0	0	0	0	0	0	0	0	0	0	0	0	0	1	0	0	0	0	0	0	0	0	0	0	0	0	0
hsa-miR-22-3p	549	416	89	130	148	44	346	67	164	218	116	102	648	475	236	125	255	1222	724	45	81	111	1131	537	0	166	123
hsa-miR-22-5p	11	0	0	42	30	25	39	0	46	29	33	37	0	15	30	0	17	22	7	0	0	0	0	0	0	0	25
hsa-miR-224-5p	0	0	0	0	0	0	0	0	0	0	0	0	0	0	0	0	0	22	0	0	24	0	24	0	0	0	18
hsa-miR-2276-3p	0	0	0	0	0	0	0	0	0	0	0	0	0	0	0	0	0	0	0	0	11	0	13	0	0	0	0
hsa-miR-2392	0	0	0	0	0	0	0	0	0	0	0	0	0	0	0	0	0	1	0	0	0	0	3	0	0	0	0
hsa-miR-24-3p	0	43	0	11	33	16	0	0	7	15	21	7	0	13	0	0	0	47	0	6	0	0	0	0	0	15	0
hsa-miR-25-3p	30	20	14	42	42	0	50	34	89	180	151	122	203	235	416	258	320	270	157	161	201	53	432	128	187	97	242
hsa-miR-25-5p	0	0	0	0	0	0	0	0	0	0	0	0	0	0	0	0	0	0	0	0	0	0	50	32	0	0	0
hsa-miR-26a-5p	285	471	185	406	932	331	626	197	540	847	363	127	48	202	187	75	96	321	133	89	86	74	646	172	108	248	146
hsa-miR-26b-5p	17	12	12	0	28	0	64	0	0	0	15	0	0	18	0	0	0	36	0	0	0	0	41	0	0	0	0
hsa-miR-27a-3p	0	0	0	0	0	0	0	0	0	0	0	0	0	0	0	0	0	0	0	0	0	0	41	0	0	0	0
hsa-miR-27a-5p	0	0	0	0	0	0	0	0	0	0	0	0	0	0	0	0	0	0	14	0	0	0	0	0	0	0	0
hsa-miR-27b-3p	117	94	26	36	52	12	136	0	63	19	54	119	140	125	99	111	125	274	122	13	14	0	124	77	0	34	75
hsa-miR-28-3p	102	0	23	74	0	0	25	0	35	36	24	56	101	67	19	0	13	80	0	0	18	0	79	18	0	0	21
hsa-miR-28-5p	0	0	0	0	33	0	19	0	0	0	0	0	31	0	0	34	22	26	28	0	0	16	61	17	0	0	0
hsa-miR-29a-3p	0	16	0	52	0	21	53	0	39	20	24	36	32	0	35	0	17	12	6	0	0	0	0	0	0	0	5
hsa-miR-29b-3p	0	0	21	0	0	0	0	0	0	0	16	11	0	0	0	0	14	0	0	0	0	0	0	0	0	19	0
hsa-miR-301a-5p	0	0	0	0	0	0	0	0	0	0	0	0	0	0	0	0	0	11	0	0	0	0	33	0	0	0	0
hsa-miR-302a-5p	0	0	1	0	0	0	0	0	0	0	0	0	0	0	0	0	0	0	0	0	0	0	0	0	0	0	0
hsa-miR-302b-3p	0	0	1	0	0	0	0	0	0	0	0	0	0	0	1	0	0	0	0	0	0	0	0	0	0	0	0
hsa-miR-3059-5p	0	0	0	0	0	0	0	20	0	0	0	0	0	0	0	0	0	0	0	0	0	0	0	0	0	0	0
hsa-miR-3064-5p	0	0	0	0	0	0	0	0	0	0	0	0	0	0	0	0	0	0	0	0	0	0	15	0	0	0	0
hsa-miR-30a-3p	0	0	0	0	0	0	0	0	16	28	0	0	0	0	0	0	19	0	0	0	7	0	19	18	0	0	0
hsa-miR-30a-5p	88	52	0	7	0	25	6	0	0	1	0	0	42	126	77	12	22	149	83	2	0	28	294	55	0	0	59
hsa-miR-30b-5p	0	0	0	0	0	0	0	0	0	0	0	0	0	0	0	0	0	0	0	0	0	0	18	0	0	0	0
hsa-miR-30c-5p	35	42	33	28	18	39	53	0	72	43	29	14	44	0	23	7	20	54	0	18	0	19	20	0	21	0	36
hsa-miR-30d-3p	2	0	0	0	0	0	0	0	0	0	0	0	0	0	0	0	0	0	0	0	0	0	0	0	0	0	0
hsa-miR-30d-5p	688	762	138	337	265	122	782	27	356	367	269	338	419	678	450	190	450	1719	573	185	127	41	1156	390	130	201	171
hsa-miR-30e-3p	154	142	32	98	0	7	63	16	66	68	115	38	205	163	115	103	62	53	87	0	0	26	203	40	10	2	48
hsa-miR-30e-5p	191	286	8	73	93	49	195	41	101	77	89	136	183	323	15	17	61	335	51	0	14	50	328	103	15	31	36
hsa-miR-31-5p	0	19	0	11	0	0	40	0	4	0	19	35	19	0	0	37	0	17	0	0	0	0	19	0	0	0	0
hsa-miR-3124-5p	0	0	0	0	0	0	0	0	0	0	0	0	0	0	0	0	0	0	0	0	0	0	0	27	0	0	0
hsa-miR-3129-3p	0	0	0	0	0	0	0	0	0	0	0	0	0	0	0	0	0	0	0	0	0	21	0	0	0	0	0
hsa-miR-3131	0	0	0	0	0	0	0	0	0	0	0	0	0	0	0	0	0	13	0	0	0	0	18	0	0	0	0
hsa-miR-3138	1	0	0	0	0	0	0	0	0	0	0	0	1	0	0	0	0	0	0	0	0	0	0	0	0	0	0
hsa-miR-3140-3p	0	0	0	0	0	0	0	0	0	0	0	0	0	0	0	0	0	0	0	0	0	0	10	0	0	0	0
hsa-miR-3144-3p	0	0	0	0	0	0	21	0	0	0	0	0	0	0	0	0	0	0	25	0	0	0	0	0	0	0	0
hsa-miR-3148	0	0	0	0	0	0	20	11	0	0	0	0	27	0	0	0	10	0	16	0	0	0	0	0	0	0	0
hsa-miR-3150a-5p	0	0	0	0	0	0	0	0	0	0	0	0	0	0	0	0	0	0	0	0	21	20	0	0	0	0	0
hsa-miR-3158-3p	0	0	0	0	0	0	0	0	0	0	0	0	0	25	0	0	0	0	0	0	0	0	18	0	0	0	0
hsa-miR-3168	0	0	0	5	7	9	3	5	4	5	5	14	0	0	6	9	0	0	0	0	4	10	0	0	11	0	4
hsa-miR-3169	20	0	0	0	0	0	0	0	0	0	0	0	0	0	0	0	0	0	0	0	0	0	0	0	0	0	0
hsa-miR-3173-5p	6	0	0	0	0	0	0	18	0	0	0	0	0	0	0	0	0	0	0	0	0	0	0	0	0	0	0
hsa-miR-3178	0	0	0	0	0	0	0	0	0	0	0	0	0	0	0	0	0	1	0	0	0	0	0	0	0	0	0
hsa-miR-3179	0	16	0	0	0	0	0	0	0	0	0	0	0	0	0	0	0	0	0	0	0	0	0	0	0	0	0
hsa-miR-3180-3p	0	7	10	11	20	8	62	0	0	21	29	0	19	17	12	0	0	31	0	8	9	0	45	0	0	11	0
hsa-miR-3180-5p	27	22	16	117	37	20	362	0	66	149	81	0	23	47	48	71	68	21	14	54	30	0	74	0	0	19	25
hsa-miR-3184-3p	0	0	0	0	0	0	0	0	0	0	0	0	0	0	0	0	0	0	0	0	0	0	0	0	0	18	0
hsa-miR-3187-3p	0	0	0	0	0	0	0	0	0	0	0	0	0	0	0	0	0	0	0	0	0	0	21	0	0	0	0
hsa-miR-3190-3p	0	0	0	0	0	0	0	0	0	0	0	0	0	0	0	0	0	0	0	0	0	0	0	1	0	0	0
hsa-miR-3191-3p	0	0	0	0	0	0	0	0	0	0	0	0	0	0	0	0	0	0	0	0	0	0	0	0	0	0	7
hsa-miR-3199	0	0	0	0	0	0	0	0	0	0	0	0	0	0	0	0	0	0	0	0	14	0	0	0	0	0	0
hsa-miR-32-5p	12	17	12	0	0	0	0	0	9	0	16	0	0	0	14	10	0	0	0	0	0	0	0	0	0	0	0
hsa-miR-3200-3p	0	0	0	0	0	0	0	0	0	0	0	0	0	0	0	0	0	0	0	0	0	0	23	0	0	0	0
hsa-miR-320a-3p	244	208	125	229	223	81	253	54	143	115	142	194	94	105	72	77	123	244	174	93	131	42	289	53	0	74	63
hsa-miR-320b	0	0	0	0	0	0	0	0	0	0	0	0	0	0	0	0	1	0	0	0	0	0	0	0	0	0	0
hsa-miR-320d	0	0	0	0	0	0	0	0	0	0	0	0	28	0	0	0	0	0	0	0	0	0	20	0	0	0	0
hsa-miR-328-3p	15	0	0	0	0	0	0	0	0	0	10	0	0	0	0	0	14	0	0	0	0	0	0	0	0	0	0
hsa-miR-330-3p	0	0	0	0	0	0	0	0	0	0	0	0	0	0	0	0	0	0	0	0	0	0	120	0	0	0	0
hsa-miR-335-3p	33	11	0	34	21	0	45	18	0	33	22	21	46	58	14	0	38	177	61	21	26	23	93	6	0	13	0
hsa-miR-335-5p	0	0	0	0	34	0	19	0	26	24	0	0	6	0	0	23	24	18	0	0	0	0	0	0	0	0	0
hsa-miR-339-3p	37	13	9	0	3	12	0	0	20	10	47	6	31	0	40	0	11	0	0	0	14	0	0	0	0	0	0
hsa-miR-339-5p	0	0	0	0	0	0	0	0	0	0	0	0	0	10	0	0	0	0	0	0	0	0	13	0	8	0	0
hsa-miR-33a-5p	0	0	0	0	0	0	0	0	0	0	0	0	15	0	0	0	0	0	0	0	0	0	0	0	0	0	0
hsa-miR-340-3p	11	23	32	25	8	0	13	0	49	101	38	85	12	0	54	84	61	29	0	0	0	36	20	0	0	13	43
hsa-miR-340-5p	47	42	0	70	16	0	38	11	0	0	0	52	54	36	21	25	0	95	49	0	0	0	94	31	0	11	0
hsa-miR-342-5p	0	0	0	0	0	0	0	0	0	0	0	14	0	0	0	0	0	0	0	0	0	0	0	0	0	0	0
hsa-miR-345-5p	0	11	0	26	15	0	0	0	14	0	15	18	0	0	0	9	0	0	0	0	0	0	23	0	14	0	0
hsa-miR-34c-5p	0	0	0	0	0	0	0	0	0	0	0	0	0	16	0	0	18	32	18	0	0	0	67	0	0	0	20
hsa-miR-3529-3p	0	0	0	0	0	0	0	0	0	0	0	0	0	0	0	0	0	0	0	0	18	0	0	0	0	0	0
hsa-miR-3609	12	0	0	0	0	0	0	0	0	0	0	0	0	0	0	0	0	26	0	0	0	0	0	0	0	0	0
hsa-miR-361-3p	11	0	8	0	11	9	23	0	22	14	39	16	12	36	17	37	62	31	0	0	0	0	22	21	0	0	7
hsa-miR-361-5p	0	0	0	0	0	0	0	0	0	0	23	0	0	0	0	0	0	0	0	0	0	0	0	0	0	0	0
hsa-miR-3613-5p	0	0	0	15	0	0	0	0	0	0	0	0	0	0	13	0	0	0	0	0	0	0	28	15	6	0	11
hsa-miR-3615	8	38	0	0	0	0	13	1	14	14	41	0	27	0	48	0	0	0	0	0	0	0	27	0	0	0	0
hsa-miR-362-5p	0	0	0	0	20	0	0	0	0	0	0	0	0	0	0	0	0	0	0	0	0	0	18	0	0	0	0
hsa-miR-363-3p	0	0	0	0	0	0	22	0	0	0	0	0	0	0	0	0	0	23	22	0	36	15	40	41	0	13	48
hsa-miR-3654	0	16	0	0	0	0	0	0	0	0	0	0	0	0	0	0	0	0	0	0	0	0	0	0	0	0	0
hsa-miR-365a-5p	0	0	0	0	0	0	0	0	0	0	0	0	0	0	0	0	0	0	0	0	0	0	0	14	0	0	0
hsa-miR-3681-5p	1	0	0	0	0	0	0	0	16	11	0	0	0	11	0	0	0	0	0	0	0	0	0	0	0	0	0
hsa-miR-3689f	0	0	0	0	0	0	0	0	0	0	0	0	0	0	0	0	0	0	15	0	0	0	3	0	9	0	0
hsa-miR-370-3p	0	0	0	0	0	0	0	0	0	0	0	0	0	0	0	0	0	0	0	0	0	0	0	0	0	16	0
hsa-miR-371a-3p	64	14	97	195	167	84	247	34	252	355	263	154	31	126	221	40	260	169	54	89	92	60	183	49	119	116	78
hsa-miR-371a-5p	225	146	6	76	123	49	419	22	191	344	266	223	165	383	97	14	46	843	158	77	34	13	1073	164	131	136	46
hsa-miR-372-3p	14656	10191	6872	10709	11977	7380	26982	3097	15324	16360	11534	12044	10071	14750	7594	7223	9792	37339	9843	4189	4155	2816	39916	12678	5265	5919	6927
hsa-miR-372-5p	17	0	0	19	0	0	55	15	19	93	24	0	26	25	18	0	0	33	0	16	19	0	0	0	0	0	45
hsa-miR-373-3p	192	178	23	8	52	48	343	38	174	96	64	56	170	204	117	90	168	495	54	16	30	32	801	214	102	59	107
hsa-miR-373-5p	0	0	0	0	0	17	0	0	0	0	0	0	0	0	0	0	0	0	0	0	0	0	30	0	0	0	0
hsa-miR-374a-3p	0	4	0	0	0	0	0	0	0	56	0	0	14	37	0	0	24	0	52	0	0	0	0	0	0	0	0
hsa-miR-374a-5p	14	0	10	0	0	0	0	0	0	0	0	0	0	0	0	0	0	0	0	0	0	4	0	0	0	0	0
hsa-miR-374b-5p	0	0	0	0	0	0	0	0	0	0	0	0	12	0	0	0	0	0	0	0	0	0	0	0	0	0	0
hsa-miR-375-3p	0	0	1	0	0	0	0	0	0	0	0	0	0	0	0	0	0	215	36	0	10	0	90	26	0	23	0
hsa-miR-378a-3p	183	143	1	12	48	0	69	11	64	99	128	14	94	63	25	0	18	166	73	0	37	0	1153	158	92	132	13
hsa-miR-378a-5p	9	0	0	0	0	0	0	0	0	0	0	0	0	0	0	0	0	34	0	0	0	0	0	0	0	0	0
hsa-miR-378b	1	0	0	0	0	0	0	0	0	0	0	0	0	0	0	0	0	0	0	0	0	0	1	1	0	0	0
hsa-miR-378c	15	0	0	0	0	0	0	0	0	0	0	0	0	0	0	0	0	0	0	0	0	0	0	0	0	0	0
hsa-miR-378g	1	0	0	0	0	0	0	0	0	0	0	0	10	0	0	0	0	1	1	0	0	0	1	0	0	0	0
hsa-miR-378i	0	0	0	0	0	0	0	0	0	0	0	0	1	0	0	0	0	1	0	0	0	0	6	1	0	0	0
hsa-miR-381-3p	0	0	0	0	0	0	0	0	0	0	0	0	0	0	0	0	0	22	0	0	0	0	15	33	0	0	0
hsa-miR-3913-5p	0	0	0	0	0	0	0	0	0	0	0	23	0	0	0	0	12	0	0	0	0	0	0	0	0	0	0
hsa-miR-3925-3p	0	0	0	0	0	0	0	0	0	0	0	0	0	0	0	0	0	10	0	0	0	0	0	0	0	0	0
hsa-miR-3925-5p	0	0	0	0	0	0	0	0	0	0	0	0	0	0	0	0	0	0	0	0	0	0	0	0	0	11	0
hsa-miR-3928-3p	0	0	0	0	0	0	14	0	0	0	0	0	0	0	0	0	0	0	0	0	0	0	10	0	0	0	0
hsa-miR-3934-5p	0	0	0	0	0	0	0	0	0	0	0	0	0	0	0	0	0	21	0	0	0	0	0	0	0	0	0
hsa-miR-3937	0	0	0	0	0	0	0	0	0	0	0	0	0	0	0	0	0	0	0	0	0	0	0	0	0	0	14
hsa-miR-3940-3p	6	0	0	0	0	0	0	0	0	0	0	0	0	0	0	0	0	0	0	0	0	0	0	0	0	0	0
hsa-miR-3976	0	0	0	0	0	0	0	0	0	0	0	0	0	3	0	0	0	1	3	0	0	0	0	0	0	0	0
hsa-miR-409-3p	0	0	0	0	0	0	0	0	0	0	0	0	0	0	0	0	0	0	0	0	0	20	3	0	0	46	0
hsa-miR-411-5p	0	0	0	0	0	0	0	0	0	0	0	0	0	0	0	0	0	0	0	0	0	0	0	24	0	0	0
hsa-miR-421	0	0	0	0	0	0	0	0	0	0	0	0	0	0	0	0	0	23	0	0	0	0	15	0	0	0	0
hsa-miR-423-3p	165	192	23	91	220	142	241	21	199	264	82	165	108	42	50	134	106	147	84	39	0	0	364	93	15	149	51
hsa-miR-423-5p	65	0	28	34	79	17	174	28	42	16	54	43	35	22	6	27	37	74	53	38	13	0	183	8	14	36	23
hsa-miR-424-3p	6	0	0	0	0	0	0	0	0	0	0	0	0	0	0	0	0	0	0	0	0	1	0	0	0	0	0
hsa-miR-425-5p	26	0	13	23	0	0	45	0	57	30	29	23	16	0	65	0	33	3	0	0	62	0	88	65	0	0	35
hsa-miR-429	0	0	0	0	0	0	0	0	0	0	0	0	0	0	0	0	0	0	22	0	0	0	0	0	0	0	0
hsa-miR-4326	0	0	0	0	0	0	0	0	0	0	0	0	0	0	0	0	0	0	0	0	0	0	73	0	21	0	0
hsa-miR-433-3p	0	0	0	0	0	0	0	0	0	0	0	0	0	0	0	0	0	0	0	0	0	0	17	0	0	19	0
hsa-miR-4418	0	1	0	0	0	0	0	0	0	0	0	0	0	0	0	0	0	0	0	0	0	0	0	0	0	0	0
hsa-miR-4420	0	0	0	0	0	0	0	0	0	0	0	0	1	0	0	0	0	0	0	0	0	0	0	0	0	0	0
hsa-miR-4425	0	0	0	0	0	0	0	0	0	0	0	0	0	13	0	0	0	0	0	0	0	0	0	0	0	0	0
hsa-miR-4426	0	0	0	0	0	0	0	0	0	0	0	0	6	0	0	0	0	0	0	0	0	0	0	0	0	0	0
hsa-miR-4433a-5p	0	0	0	0	0	0	10	0	0	8	0	0	0	0	0	0	0	0	0	0	4	0	0	0	0	0	0
hsa-miR-4443	0	0	0	0	0	0	0	0	0	0	0	0	0	0	0	0	0	0	0	0	0	0	1	0	0	0	0
hsa-miR-4449	0	10	0	0	0	0	0	0	0	0	0	0	0	0	0	0	0	0	0	0	0	0	0	0	0	0	0
hsa-miR-4457	0	0	0	0	0	0	0	0	0	0	22	0	0	0	0	0	0	0	0	0	0	0	0	0	0	0	0
hsa-miR-4460	0	0	0	0	0	0	0	13	0	0	0	0	0	0	0	0	0	0	0	0	0	0	0	0	0	0	0
hsa-miR-4473	0	0	0	0	0	0	0	0	0	0	17	0	0	0	0	0	0	0	0	0	0	0	0	0	0	24	0
hsa-miR-4477b	0	0	0	0	0	0	0	0	0	0	0	0	0	0	0	0	0	0	0	0	15	0	0	0	0	0	0
hsa-miR-4482-5p	15	0	0	0	0	7	0	0	0	0	0	0	0	15	0	0	0	0	0	0	0	0	0	0	0	0	0
hsa-miR-4485-3p	31	50	0	42	34	41	67	31	47	82	13	0	0	12	64	25	0	47	1	0	100	0	93	6	0	37	10
hsa-miR-4488	0	19	0	0	8	0	0	0	0	0	0	0	3	8	0	0	0	6	0	4	0	0	0	0	0	0	0
hsa-miR-449a	17	0	0	0	0	0	0	0	0	0	0	15	0	0	0	0	0	0	0	0	0	0	0	0	0	0	0
hsa-miR-449c-5p	46	0	0	0	14	0	0	0	0	0	0	0	0	0	0	0	0	23	0	0	0	25	39	30	0	12	0
hsa-miR-450a-5p	0	14	0	0	0	0	0	0	13	0	0	0	0	0	0	0	0	3	0	0	0	0	0	17	0	0	0
hsa-miR-450b-5p	9	0	0	0	0	0	0	0	0	0	0	0	0	0	0	0	0	0	0	0	19	0	0	12	0	0	0
hsa-miR-4512	0	0	0	0	0	0	0	0	0	0	0	0	0	0	13	0	0	0	0	0	0	0	0	0	0	0	0
hsa-miR-4521	0	0	0	0	0	0	0	0	0	0	0	0	0	0	0	0	0	0	0	0	0	0	64	0	0	0	0
hsa-miR-4535	0	0	9	0	0	0	0	0	0	0	0	0	0	0	0	0	0	0	0	0	0	0	0	0	0	0	0
hsa-miR-454-5p	0	0	0	0	17	0	0	0	0	0	0	0	0	0	0	0	0	0	0	0	0	0	0	0	0	28	0
hsa-miR-455-5p	0	0	0	0	0	0	12	0	0	0	0	0	0	0	0	0	0	0	0	0	0	0	43	19	0	0	0
hsa-miR-4650-5p	0	0	0	0	0	0	0	0	0	0	0	10	0	0	0	0	0	0	0	0	0	0	0	0	0	0	0
hsa-miR-4654	0	0	0	0	0	0	0	0	0	0	0	0	0	0	0	0	0	0	0	0	0	0	20	0	0	23	0
hsa-miR-4658	0	19	0	0	0	0	0	0	0	0	0	0	0	0	0	0	0	0	0	0	0	0	0	0	0	0	0
hsa-miR-4659b-3p	0	0	0	0	0	0	0	0	0	0	0	0	0	0	0	0	0	0	0	0	0	0	0	0	0	14	0
hsa-miR-4661-5p	12	0	0	0	0	0	0	0	18	18	6	0	0	12	44	18	25	0	77	0	0	0	0	4	0	0	0
hsa-miR-4664-3p	0	0	0	0	0	0	0	0	19	0	0	0	0	0	0	0	0	0	0	0	0	0	0	0	0	0	0
hsa-miR-4684-5p	0	0	0	0	0	0	0	0	0	0	0	0	0	0	0	0	0	0	0	0	0	0	0	15	0	0	0
hsa-miR-4685-5p	0	2	0	0	0	1	0	0	0	0	0	0	0	0	0	0	0	0	0	0	0	0	0	0	0	0	0
hsa-miR-4687-3p	0	0	0	0	0	0	0	0	0	0	0	0	0	0	0	0	0	0	0	0	0	0	17	0	8	0	0
hsa-miR-4705	0	0	0	0	0	0	0	0	0	0	14	19	27	0	0	0	0	0	0	0	0	0	0	0	0	0	0
hsa-miR-4721	0	0	9	0	0	0	0	0	0	0	0	0	0	0	0	0	0	0	0	0	0	0	0	0	0	0	0
hsa-miR-4727-5p	0	0	0	0	1	0	0	0	0	0	0	0	0	0	0	0	0	0	0	0	0	0	0	0	0	0	0
hsa-miR-4745-5p	23	6	0	0	12	0	0	0	0	0	0	0	0	0	0	0	0	0	0	0	0	0	0	0	0	0	0
hsa-miR-4746-5p	0	0	0	0	0	0	0	0	0	0	0	0	0	0	0	0	0	0	0	0	0	0	0	0	21	0	0
hsa-miR-4775	12	43	0	7	0	0	0	0	0	0	0	0	47	58	12	0	0	97	30	24	12	18	20	0	0	13	0
hsa-miR-4787-3p	0	14	0	0	0	0	0	0	0	0	0	0	0	0	0	0	0	0	0	0	0	0	0	0	0	0	0
hsa-miR-4788	0	0	0	0	0	0	0	0	0	0	0	0	0	0	0	0	0	0	0	0	0	16	0	0	0	0	0
hsa-miR-4797-5p	0	0	0	0	0	0	0	0	0	0	0	0	0	0	0	0	0	0	0	0	0	0	0	0	0	18	0
hsa-miR-4798-5p	0	0	0	0	0	0	0	0	0	0	0	0	0	0	0	0	0	14	0	0	0	0	0	0	0	0	0
hsa-miR-4800-3p	0	0	0	0	0	0	0	0	0	0	0	0	0	0	0	0	0	0	0	0	9	0	0	0	0	0	0
hsa-miR-483-3p	0	0	0	0	0	0	0	0	0	0	0	0	0	0	15	0	0	0	0	0	23	0	0	0	0	16	14
hsa-miR-484	0	0	1	0	16	0	0	0	11	0	0	0	0	0	0	0	0	0	0	0	0	0	0	0	0	0	0
hsa-miR-485-3p	0	0	15	0	0	0	0	0	0	0	0	0	0	0	0	0	0	0	0	16	0	0	25	0	0	0	0
hsa-miR-493-3p	0	0	0	0	0	0	0	0	0	0	0	0	0	0	0	0	0	35	0	0	0	0	0	19	0	18	0
hsa-miR-497-5p	0	0	0	0	0	0	0	0	0	26	21	0	0	0	0	0	0	0	0	0	0	0	0	0	0	0	0
hsa-miR-4999-5p	0	0	0	0	0	0	0	0	0	0	0	0	10	12	7	4	0	0	0	0	0	0	0	0	0	0	0
hsa-miR-499a-5p	48	63	0	25	11	0	53	19	15	51	29	26	10	52	25	43	56	113	0	51	0	0	30	0	20	0	19
hsa-miR-5001-5p	0	0	0	0	0	0	0	0	0	0	0	0	0	0	0	0	0	0	0	0	0	0	1	0	0	0	0
hsa-miR-5002-3p	0	0	0	0	1	0	0	0	0	0	0	0	0	0	0	0	0	0	0	0	0	0	0	0	0	0	0
hsa-miR-500a-3p	33	0	0	0	0	0	0	0	28	0	0	0	16	0	0	0	60	17	0	0	0	0	0	38	35	0	0
hsa-miR-500b-3p	0	27	0	0	0	0	0	0	0	0	0	0	4	0	0	0	0	0	0	0	0	0	7	0	0	0	0
hsa-miR-501-3p	0	16	0	0	0	0	35	0	0	20	0	38	4	13	19	0	13	16	0	0	0	0	45	0	0	47	18
hsa-miR-501-5p	0	0	0	0	0	0	0	0	10	0	0	0	0	0	0	0	0	0	0	0	0	0	0	0	0	0	0
hsa-miR-5010-3p	0	0	0	0	0	0	0	0	6	0	0	0	0	0	0	0	0	0	0	0	0	0	0	0	0	0	0
hsa-miR-5011-3p	0	0	0	0	0	0	0	0	17	14	0	0	0	0	8	0	0	0	8	0	0	0	0	0	0	0	0
hsa-miR-5011-5p	0	0	14	0	0	0	0	0	0	0	0	0	0	0	0	0	0	0	0	0	0	0	0	0	0	0	0
hsa-miR-502-3p	12	21	0	16	0	0	17	0	0	43	21	28	50	49	22	0	17	120	0	0	33	18	0	0	0	15	0
hsa-miR-503-5p	0	0	0	0	0	0	0	0	0	0	0	0	0	16	0	0	0	0	14	0	0	0	0	0	0	0	0
hsa-miR-504-5p	0	0	16	0	0	0	21	0	0	0	0	0	26	12	0	0	0	25	16	0	0	0	0	0	0	0	0
hsa-miR-505-3p	0	0	0	0	0	0	0	0	0	0	17	0	0	0	0	0	0	0	0	0	0	0	0	0	0	0	0
hsa-miR-506-3p	0	0	0	14	12	0	72	17	7	25	17	52	0	0	26	27	21	0	0	0	26	0	0	38	0	0	0
hsa-miR-506-5p	0	0	0	0	0	0	0	0	18	0	0	0	0	0	0	0	0	16	0	0	0	0	0	0	0	0	0
hsa-miR-508-3p	371	144	35	67	79	85	194	52	167	196	26	203	293	292	167	132	112	770	183	57	107	1	603	101	26	72	41
hsa-miR-508-5p	15	0	9	0	0	0	16	0	0	0	0	0	29	33	0	0	0	24	0	14	0	0	72	84	0	0	0
hsa-miR-509-3-5p	1139	426	170	179	546	137	1556	75	553	556	609	928	839	1264	1346	902	1471	1973	1089	791	504	507	3459	258	421	403	451
hsa-miR-509-3p	103	19	5	30	0	23	70	0	12	58	29	33	71	111	104	0	32	55	29	5	17	0	83	63	19	29	49
hsa-miR-509-5p	21	17	0	20	0	0	0	0	0	52	19	26	0	0	0	0	16	0	0	0	0	0	0	0	0	0	0
hsa-miR-5094	0	0	0	0	0	1	0	0	0	0	1	0	0	0	0	0	0	0	0	0	0	0	0	0	0	0	0
hsa-miR-5100	6	0	14	0	0	0	27	8	10	14	0	0	15	22	15	27	18	90	0	17	17	24	10	0	26	31	6
hsa-miR-511-5p	0	0	0	0	0	0	0	0	0	0	0	0	0	0	0	0	0	15	0	0	0	0	9	0	0	14	0
hsa-miR-512-3p	7	30	14	25	13	0	13	0	40	10	6	21	15	48	0	0	19	38	47	16	22	0	223	16	85	20	0
hsa-miR-513b-5p	0	0	0	0	0	0	0	0	0	0	0	0	0	0	0	0	0	0	0	0	0	0	26	0	0	0	0
hsa-miR-513c-5p	10	36	0	0	5	13	19	0	9	15	0	0	15	15	25	0	39	39	21	0	0	0	29	29	0	0	0
hsa-miR-514a-3p	291	181	344	754	720	428	1933	124	685	1017	625	804	138	90	754	613	855	468	106	386	278	131	430	107	90	307	349
hsa-miR-514a-5p	0	0	0	0	0	0	0	7	13	0	0	0	0	0	16	0	0	0	0	0	0	0	22	0	0	0	20
hsa-miR-515-3p	0	0	0	0	0	0	12	0	0	0	0	0	0	0	0	22	0	0	0	0	0	0	0	0	0	0	0
hsa-miR-515-5p	11	20	0	0	0	0	0	0	0	0	0	0	0	28	0	20	0	0	8	0	0	0	0	0	0	0	18
hsa-miR-516a-5p	8	17	20	15	0	0	13	0	31	0	0	0	20	24	0	13	36	26	0	0	16	0	21	11	0	0	18
hsa-miR-516b-5p	434	250	161	358	267	254	664	117	342	311	567	323	117	143	196	211	239	744	463	251	179	102	863	130	71	254	422
hsa-miR-517-5p	0	0	0	0	0	0	0	0	0	0	0	0	0	0	0	0	0	0	0	0	0	17	0	0	0	0	0
hsa-miR-517a-3p	0	0	0	0	0	0	58	12	0	0	0	0	0	0	0	0	11	0	0	0	0	0	33	0	0	0	22
hsa-miR-517b-3p	17	0	0	20	19	0	0	0	0	21	0	0	1	0	0	32	0	0	23	0	0	0	0	0	0	0	0
hsa-miR-517c-3p	0	0	0	0	18	0	0	0	0	0	0	0	0	0	0	0	0	0	0	0	0	0	0	0	0	0	0
hsa-miR-518a-3p	0	0	0	0	0	0	0	0	0	0	0	0	15	0	0	0	0	0	0	0	0	0	17	0	0	0	0
hsa-miR-518b	0	0	0	0	0	0	16	0	0	0	0	41	0	0	0	19	0	0	0	0	18	20	17	18	0	0	0
hsa-miR-518c-3p	0	0	0	0	0	0	11	0	0	0	16	0	0	0	81	0	0	0	0	12	13	0	20	0	0	0	23
hsa-miR-518c-5p	0	0	0	0	0	0	0	0	0	0	0	0	13	0	0	0	0	15	0	0	0	0	0	0	23	0	0
hsa-miR-518d-5p	14	0	0	0	0	0	0	0	0	0	0	0	1	0	0	0	0	0	0	0	0	0	0	0	1	0	0
hsa-miR-518e-5p	0	0	0	28	0	0	0	10	0	0	0	19	0	0	0	1	31	0	0	0	0	0	0	0	16	0	0
hsa-miR-518f-5p	0	0	0	0	0	0	0	0	0	0	0	0	0	0	46	0	0	0	0	0	0	0	0	0	24	0	0
hsa-miR-519a-3p	19	0	0	0	0	0	13	0	0	0	0	0	0	0	0	0	0	21	0	0	0	0	21	0	0	0	0
hsa-miR-519a-5p	0	0	0	0	0	13	0	0	0	37	18	0	7	0	0	50	0	0	0	0	0	0	0	0	0	48	0
hsa-miR-519b-5p	0	0	0	0	0	0	32	0	0	0	0	0	0	0	0	0	0	17	0	0	26	0	90	15	0	0	35
hsa-miR-519c-5p	0	0	0	0	0	1	0	0	0	0	0	0	0	0	0	0	0	0	0	13	0	0	0	0	0	0	0
hsa-miR-519d-3p	0	19	0	0	0	0	15	0	15	0	42	0	0	0	0	0	0	0	0	23	0	0	72	0	0	28	0
hsa-miR-520a-3p	11	0	0	0	12	0	30	0	0	0	0	16	14	68	19	26	0	65	21	32	17	0	154	16	0	0	0
hsa-miR-520a-5p	0	0	0	1	0	0	0	0	0	0	0	0	0	19	0	0	0	0	0	12	19	0	19	0	0	0	0
hsa-miR-520b-5p	0	0	0	0	0	0	0	0	0	0	0	0	0	0	0	0	1	0	0	0	0	0	0	0	0	0	0
hsa-miR-520c-3p	0	0	0	18	0	0	0	0	0	0	0	0	0	0	0	0	0	0	0	0	0	0	0	0	0	0	0
hsa-miR-520c-5p	0	0	0	0	0	0	0	0	0	0	0	0	0	0	1	0	0	0	0	0	0	0	45	0	0	0	20
hsa-miR-520d-3p	0	0	0	0	0	0	0	2	0	0	0	0	0	0	0	0	0	0	0	0	0	0	0	0	0	0	0
hsa-miR-520d-5p	0	0	0	0	0	0	0	0	0	0	0	0	0	0	0	0	0	28	0	0	0	0	0	0	0	0	0
hsa-miR-520e-5p	0	0	0	0	0	0	0	0	0	0	0	0	0	0	0	0	0	0	0	0	0	0	0	0	16	0	0
hsa-miR-520f-3p	0	0	16	58	20	71	40	0	0	0	11	0	27	0	0	16	0	0	0	0	16	14	112	0	19	0	0
hsa-miR-520g-3p	0	0	14	0	0	0	22	0	0	0	0	0	0	0	34	0	0	0	0	0	0	0	26	33	0	0	0
hsa-miR-520g-5p	0	0	0	0	0	0	0	0	0	0	0	0	0	1	0	18	0	0	0	0	10	45	0	0	0	0	10
hsa-miR-522-3p	10	0	0	0	0	0	0	0	8	21	15	0	0	0	0	0	0	0	0	0	0	0	34	0	20	0	0
hsa-miR-523-3p	0	0	0	0	0	0	17	0	0	0	0	0	0	0	5	0	0	0	0	19	0	0	0	0	0	0	0
hsa-miR-523-5p	0	0	0	0	0	0	0	0	0	0	0	0	0	0	0	0	0	0	0	0	0	18	0	0	0	0	0
hsa-miR-525-5p	0	0	0	0	0	0	0	0	0	0	0	0	0	0	20	0	0	0	0	0	0	0	35	0	0	0	0
hsa-miR-526a-5p	0	0	0	16	0	0	0	0	0	37	0	0	0	0	0	0	0	23	0	0	0	0	0	0	0	0	0
hsa-miR-526b-5p	0	0	0	0	0	0	0	0	16	19	0	9	40	0	38	16	18	29	0	0	18	29	148	0	50	0	0
hsa-miR-532-5p	348	326	21	55	66	46	170	13	88	102	57	41	0	37	0	20	51	199	144	47	25	39	259	0	0	16	17
hsa-miR-542-3p	0	0	0	0	16	0	0	0	0	0	0	0	12	0	0	0	0	0	0	0	0	0	14	0	0	0	0
hsa-miR-543	0	0	0	0	0	0	0	0	0	0	0	0	0	0	0	0	0	0	0	22	0	0	0	4	0	51	0
hsa-miR-548ad-3p	0	0	0	0	0	0	0	0	0	0	0	0	0	0	0	0	0	13	0	0	0	0	0	0	0	0	0
hsa-miR-548ag	0	0	0	3	0	19	0	0	0	0	0	0	0	0	0	0	0	20	0	0	0	0	0	0	0	0	0
hsa-miR-548ba	10	49	0	18	0	0	26	0	0	0	21	12	29	23	15	47	22	78	17	21	0	0	41	21	12	0	18
hsa-miR-548j-3p	0	0	0	0	0	0	0	0	0	0	0	0	0	0	0	0	0	0	0	0	0	0	0	24	0	0	0
hsa-miR-548k	0	0	0	0	0	0	0	0	0	0	0	0	0	0	0	0	0	19	0	0	0	0	0	0	0	0	0
hsa-miR-548o-3p	0	0	0	0	0	0	0	0	0	0	0	0	0	0	0	0	0	0	0	0	0	0	89	29	1	23	0
hsa-miR-549a-3p	0	0	0	0	0	0	0	0	0	20	0	0	0	0	0	0	0	0	0	0	0	0	0	0	0	0	0
hsa-miR-549a-5p	0	0	0	0	0	0	0	0	0	0	0	0	0	0	0	4	0	0	0	0	0	0	0	0	0	0	0
hsa-miR-550a-5p	0	0	0	0	0	0	0	0	0	11	0	0	0	0	0	0	0	0	0	15	0	0	7	0	0	0	0
hsa-miR-551b-3p	0	0	0	0	0	0	0	0	0	0	0	0	0	0	0	0	0	0	0	0	0	0	0	0	0	0	15
hsa-miR-556-5p	0	0	0	0	0	0	0	0	0	0	0	0	0	0	0	0	0	0	0	0	0	0	0	24	0	0	0
hsa-miR-5682	0	0	0	0	0	0	27	0	0	0	0	0	0	0	0	0	0	0	0	0	0	0	0	0	0	0	0
hsa-miR-5683	22	0	0	0	0	0	0	0	0	0	17	0	18	0	0	0	0	0	0	0	0	42	27	17	0	0	0
hsa-miR-5699-3p	0	0	0	0	0	0	0	0	0	0	0	0	0	0	0	0	0	0	0	0	0	0	0	0	10	0	0
hsa-miR-5701	0	23	0	0	17	0	0	0	0	0	0	0	0	0	0	0	0	9	13	1	0	0	0	0	0	0	0
hsa-miR-576-5p	0	0	0	0	0	0	0	0	0	0	0	0	0	13	0	0	0	0	0	0	0	0	0	0	0	0	0
hsa-miR-582-3p	12	0	0	0	0	0	0	0	4	0	0	0	0	32	0	10	36	0	46	0	23	14	0	0	0	13	0
hsa-miR-582-5p	0	0	0	0	0	0	0	0	0	0	0	0	0	0	0	0	0	0	21	0	13	0	0	0	0	0	0
hsa-miR-585-3p	91	993	2	109	6	43	179	28	17	59	11	41	156	268	34	231	526	803	57	42	0	0	70	228	0	24	0
hsa-miR-589-5p	0	0	0	0	0	0	7	0	0	0	0	0	0	0	0	0	0	0	0	0	0	0	52	0	0	0	6
hsa-miR-592	0	0	0	0	0	0	0	0	0	18	0	0	0	0	0	0	12	0	0	0	0	0	14	0	0	0	0
hsa-miR-615-3p	14	17	0	0	18	0	0	0	0	0	0	0	0	0	0	0	0	11	0	14	0	0	20	0	11	0	0
hsa-miR-618	0	0	0	0	0	0	0	0	0	0	0	0	0	0	0	0	0	0	0	0	0	16	0	0	0	0	0
hsa-miR-625-3p	0	0	10	18	0	0	13	15	13	29	0	0	14	36	42	0	17	60	0	0	0	28	16	16	0	13	0
hsa-miR-625-5p	0	0	0	0	0	0	0	0	0	0	0	0	0	0	0	0	0	11	0	0	0	0	0	0	0	0	0
hsa-miR-628-3p	0	0	0	0	11	0	0	0	0	0	0	0	10	0	16	0	2	23	0	11	0	0	19	0	0	0	0
hsa-miR-628-5p	8	0	0	0	0	0	0	0	0	0	0	0	0	0	0	0	0	0	0	0	0	0	0	0	0	0	0
hsa-miR-629-5p	0	0	0	0	0	0	0	0	0	0	0	0	0	0	0	0	0	47	45	19	1	0	55	8	0	15	0
hsa-miR-632	0	0	0	0	9	0	0	0	0	0	0	0	0	0	0	0	0	0	0	0	0	0	0	0	0	0	0
hsa-miR-642a-3p	0	0	0	0	0	0	0	0	0	0	0	0	0	0	0	0	0	0	0	0	0	0	0	0	30	0	0
hsa-miR-6500-3p	0	0	0	0	0	0	0	0	0	0	0	0	0	0	0	0	0	0	0	0	0	0	13	0	0	0	0
hsa-miR-6507-5p	0	0	0	0	24	0	0	0	0	0	0	0	0	0	0	0	0	0	0	0	0	0	19	0	0	0	0
hsa-miR-651-5p	0	0	0	0	0	0	0	5	0	0	0	0	0	0	0	0	0	16	0	0	0	0	38	0	0	0	8
hsa-miR-6511a-3p	0	0	0	0	13	0	0	0	0	0	18	17	0	23	0	0	0	0	0	0	0	0	0	0	0	0	0
hsa-miR-6511b-3p	0	0	7	0	0	0	14	0	0	0	0	0	13	0	14	0	0	0	0	0	0	0	0	0	0	14	0
hsa-miR-6511b-5p	0	0	0	0	10	0	0	0	0	0	0	0	0	0	0	0	0	0	0	0	0	0	0	0	0	0	0
hsa-miR-6516-5p	0	0	0	0	0	0	0	0	0	0	0	0	0	0	0	0	0	0	0	0	0	0	15	0	0	0	0
hsa-miR-652-3p	0	0	0	0	0	1	0	0	0	11	0	0	5	0	0	0	0	0	11	0	0	0	34	0	0	0	0
hsa-miR-654-5p	0	0	0	0	0	0	0	0	0	0	0	0	0	0	0	0	0	0	0	0	0	0	6	0	0	0	0
hsa-miR-659-5p	0	0	36	0	0	0	0	0	0	0	0	0	0	0	0	0	0	0	0	0	0	0	0	0	0	0	0
hsa-miR-660-5p	27	0	0	0	0	0	56	0	34	10	59	0	36	88	2	0	7	166	17	19	19	0	99	12	0	0	32
hsa-miR-664a-5p	17	0	0	0	0	0	0	0	0	0	0	0	11	0	0	0	0	22	0	0	0	0	0	0	0	0	0
hsa-miR-664b-5p	42	38	8	0	0	24	0	0	13	0	17	7	31	64	0	0	0	26	0	0	0	0	0	0	0	0	0
hsa-miR-671-3p	0	0	0	0	0	0	0	0	4	0	0	0	0	0	0	0	0	13	0	0	0	0	0	0	0	0	0
hsa-miR-671-5p	0	0	0	0	0	0	0	0	0	0	0	0	0	0	0	0	0	0	0	2	0	0	1	22	0	0	0
hsa-miR-6715a-3p	0	0	0	0	0	0	0	0	0	0	0	0	0	0	0	0	0	0	0	0	0	0	7	0	0	0	0
hsa-miR-6724-5p	0	0	0	0	0	0	19	0	0	0	0	0	0	0	0	0	0	0	0	0	0	0	0	0	0	0	0
hsa-miR-6766-3p	0	0	0	0	0	0	0	0	0	0	0	0	0	0	0	0	0	17	0	0	0	0	0	0	0	0	0
hsa-miR-6772-3p	0	0	0	0	0	0	0	0	0	23	0	0	0	0	0	0	0	0	0	0	0	0	0	0	0	0	0
hsa-miR-6785-5p	0	13	0	0	0	0	0	0	0	0	0	0	0	0	0	0	0	0	0	0	0	0	0	0	0	0	0
hsa-miR-6787-3p	0	1	0	1	0	0	0	0	0	0	0	0	0	1	0	1	0	0	1	0	0	0	0	0	0	0	0
hsa-miR-6789-5p	0	0	0	0	0	0	12	0	0	0	0	0	0	0	0	0	0	0	0	0	0	0	0	0	0	0	0
hsa-miR-6800-5p	20	0	0	0	0	0	14	0	0	0	0	0	0	0	0	0	0	0	0	0	0	0	0	0	0	0	0
hsa-miR-6803-3p	0	13	0	0	0	0	0	0	0	0	0	0	0	0	0	0	0	0	0	0	0	0	0	0	0	0	0
hsa-miR-6821-5p	0	20	0	60	27	0	10	10	54	18	0	24	0	0	0	0	0	0	0	0	0	0	0	0	0	0	0
hsa-miR-6823-3p	1	0	0	0	0	0	0	0	0	0	0	0	0	0	0	0	0	0	0	0	0	0	0	0	0	0	0
hsa-miR-6839-5p	10	0	0	0	0	0	0	0	0	0	0	0	0	0	0	0	0	0	0	0	0	0	0	0	0	0	0
hsa-miR-7-5p	1021	917	309	1185	770	731	1332	328	943	1551	835	800	751	1431	324	894	1269	2661	1854	387	1064	414	9252	1615	1968	943	841
hsa-miR-7161-3p	0	44	0	0	0	0	0	0	22	0	0	0	0	0	0	0	0	24	0	0	0	0	0	0	0	0	0
hsa-miR-7161-5p	0	0	0	0	0	16	0	14	0	0	0	0	0	0	0	0	0	0	0	0	0	0	0	0	0	0	0
hsa-miR-744-3p	0	0	0	0	0	0	0	0	0	0	0	0	14	0	0	0	0	0	0	0	0	0	0	0	0	0	0
hsa-miR-760	0	0	0	0	5	0	0	0	0	0	0	0	0	0	0	0	0	0	0	0	0	0	12	18	0	0	0
hsa-miR-769-5p	28	20	0	10	0	0	11	10	0	0	16	22	14	0	0	0	0	47	0	0	0	0	5	35	0	0	0
hsa-miR-7702	0	16	0	0	0	0	14	0	13	0	0	0	0	0	0	20	0	23	0	0	0	0	21	0	0	0	0
hsa-miR-7704	65	140	14	46	34	6	54	25	20	49	0	38	128	106	52	7	13	198	98	11	0	25	182	37	13	32	32
hsa-miR-7706	0	0	0	0	0	0	0	0	9	0	11	0	0	0	0	0	0	0	0	0	0	0	9	13	14	0	0
hsa-miR-7977	8	0	0	0	22	0	0	0	7	0	0	0	0	0	0	16	0	18	0	0	0	0	23	0	0	0	0
hsa-miR-873-5p	0	0	0	0	0	0	0	0	0	0	0	0	0	0	0	0	0	16	0	0	0	0	15	0	0	0	0
hsa-miR-874-3p	0	22	0	0	0	0	0	0	0	0	0	0	0	0	0	0	0	0	0	0	0	0	0	0	0	0	0
hsa-miR-877-5p	13	0	0	0	0	0	0	0	15	0	0	0	0	0	0	0	0	0	0	0	0	0	43	0	20	0	0
hsa-miR-885-3p	0	0	0	0	0	0	0	0	0	0	0	0	0	0	0	0	0	0	0	0	0	0	7	0	0	0	0
hsa-miR-885-5p	0	0	0	0	0	0	0	0	0	0	0	0	0	36	0	0	0	0	0	0	0	0	0	0	0	0	0
hsa-miR-887-5p	0	0	0	0	0	0	0	0	0	18	0	0	0	0	0	0	0	0	0	0	0	0	0	0	0	0	0
hsa-miR-888-5p	22	36	10	0	21	0	59	31	7	0	0	68	14	21	39	96	20	34	19	18	13	22	185	33	8	43	17
hsa-miR-891a-5p	95	50	0	0	0	0	78	11	0	20	25	18	83	71	55	38	94	51	79	41	24	34	370	55	10	17	82
hsa-miR-892a	0	0	0	0	25	0	21	11	0	0	51	14	0	32	0	50	0	24	0	0	20	22	29	237	0	0	11
hsa-miR-892b	16	0	0	0	0	0	16	0	15	0	0	0	0	15	0	0	0	20	0	0	0	0	23	0	21	0	0
hsa-miR-892c-3p	0	0	0	0	0	0	0	0	0	0	0	0	0	0	0	0	0	0	0	0	0	0	0	43	0	0	0
hsa-miR-9-3p	0	0	0	0	0	0	0	0	0	0	0	0	0	0	0	0	0	0	0	0	0	0	18	30	20	0	0
hsa-miR-9-5p	74	129	0	0	75	0	46	18	30	27	106	0	111	240	63	81	107	400	391	118	197	51	3420	531	190	90	114
hsa-miR-92a-3p	819	933	150	382	505	218	1112	241	571	854	687	591	1080	1738	1398	1064	1502	2308	916	693	757	480	2493	372	198	824	1243
hsa-miR-92b-3p	122	203	30	71	72	46	258	0	90	141	57	88	439	369	152	154	296	645	319	64	73	31	1506	354	95	73	140
hsa-miR-92b-5p	0	0	0	0	0	0	14	0	0	0	0	0	0	0	0	0	0	0	0	0	0	0	10	0	9	0	0
hsa-miR-93-5p	0	20	14	24	0	0	0	0	0	0	0	21	0	0	14	0	0	0	0	0	0	0	89	27	0	0	0
hsa-miR-935	0	0	18	0	0	0	0	0	0	0	0	0	0	0	20	22	0	0	0	0	0	0	17	0	0	0	0
hsa-miR-937-3p	13	0	0	0	0	0	17	0	9	0	0	24	43	23	39	0	16	36	57	0	0	0	122	0	0	20	0
hsa-miR-939-5p	0	0	0	0	0	0	15	0	0	0	0	0	0	0	0	0	0	0	0	0	0	0	0	0	0	0	0
hsa-miR-941	0	0	0	20	44	0	0	0	21	0	0	0	10	28	25	0	0	8	0	18	0	0	98	17	86	60	43
hsa-miR-942-5p	0	0	3	20	0	0	0	0	0	0	0	15	0	0	0	0	0	0	0	0	0	0	11	0	1	0	0
hsa-miR-944	0	0	0	0	0	0	0	12	0	13	0	0	8	14	0	0	0	0	0	0	0	0	9	0	0	0	0
hsa-miR-95-3p	25	0	0	0	0	13	0	0	28	16	0	0	39	52	0	19	16	74	37	0	20	14	14	0	33	0	9
hsa-miR-96-5p	7	17	10	53	32	12	23	0	35	16	40	0	34	19	33	39	12	21	0	35	16	12	30	0	10	0	18
hsa-miR-98-5p	0	0	0	0	0	0	0	0	0	0	0	0	0	0	0	0	15	0	0	0	13	0	0	0	0	0	0
hsa-miR-9901	34	61	10	27	18	9	44	18	0	44	16	48	34	16	89	0	12	58	0	41	29	0	11	0	0	0	0
hsa-miR-9903	0	0	0	0	0	0	0	0	0	0	0	0	0	0	0	0	0	6	0	0	29	0	8	0	0	0	0
hsa-miR-99a-5p	139	171	54	323	183	187	0	52	182	169	142	78	84	152	152	236	255	241	308	219	107	99	336	203	18	38	114
hsa-miR-99b-3p	0	0	0	0	0	0	0	0	0	0	0	0	0	0	0	0	0	0	0	0	0	0	18	0	0	0	0
hsa-miR-99b-5p	50	43	15	0	0	0	40	0	25	31	18	0	0	0	0	0	0	75	38	0	0	0	582	71	62	0	0

## Sheet: Supplemental Table S3
Supplemental Table S3. Significantly differentially expressed miRNAs in oocytes and embryos.
# Significantly differentially expressed miRNAs (FDR < 0.05) between human oocytes (n=12) and embryos (n=10) according to MACAU2.0 R package (Sun et al. 2017).
# Number of observations (num-IDV), effect size (beta), standard error of beta (se(beta)), p-value, heritability (h2), variance (sigma2), model convergence information (converged), and FDR.
miRNA	num-IDV	beta	se(beta)	p-value	h2	sigma2	converged	FDR
hsa-miR-25-3p	22	1.58985	0.308974	2.66716e-07	0	0.464918	TRUE	3.53741e-05
hsa-miR-363-3p	22	2.60348	0.517624	4.91306e-07	0	0.947353	TRUE	3.53741e-05
hsa-miR-629-5p	22	2.28363	0.476081	1.61287e-06	0	0.591639	TRUE	7.52043e-05
hsa-miR-375-3p	22	2.30851	0.486553	2.08901e-06	0	0.672923	TRUE	7.52043e-05
hsa-miR-9-5p	22	2.37656	0.521451	5.17437e-06	0	1.32986	TRUE	0.000149022
hsa-miR-92b-3p	22	0.694075	0.16	1.43809e-05	0	0.1168	TRUE	0.000345141
hsa-miR-183-5p	22	1.14344	0.291668	8.84211e-05	0.85304	0.28099	TRUE	0.00181895
hsa-miR-514a-3p	22	-0.486215	0.128846	0.000160891	0	0.0803	TRUE	0.00289605
hsa-miR-1307-3p	22	2.42943	0.665896	0.000263923	0	1.7852	TRUE	0.00422276
hsa-miR-1298-5p	22	-2.36785	0.685303	0.000549899	0.343754	1.78219	TRUE	0.00791855
hsa-miR-6821-5p	22	-2.1217	0.66748	0.00147951	0.5584	1.23374	TRUE	0.0193682
hsa-miR-26a-5p	22	-0.706272	0.235739	0.00273555	0.639863	0.203962	TRUE	0.0325815
hsa-miR-7-5p	22	0.656018	0.220599	0.00294138	1	0.159998	TRUE	0.0325815
hsa-miR-146b-5p	22	1.45925	0.522399	0.00521637	0	1.15144	TRUE	0.0454351
hsa-miR-29a-3p	22	-1.52133	0.54605	0.00533516	0	1.11258	TRUE	0.0454351
hsa-miR-30e-5p	22	-0.798548	0.288384	0.00562206	0	0.388204	TRUE	0.0454351
hsa-miR-941	22	2.39659	0.866178	0.00565992	1	2.23973	TRUE	0.0454351
hsa-miR-16-5p	22	-1.58178	0.571918	0.00567939	0.592359	1.08745	TRUE	0.0454351
hsa-miR-5100	22	1.52222	0.55548	0.00613717	0	1.36814	TRUE	0.0465133
hsa-miR-664b-5p	22	-1.74167	0.641433	0.00662209	0	1.45252	TRUE	0.0476791
hsa-miR-519b-5p	22	1.67343	0.621011	0.00704546	0	1.41889	TRUE	0.0483117

## Sheet: Supplemental Table S4
Supplemental Table S4. isomiR expression matrix.
# Number of reads mapped to each isomiR in human oocytes, zygotes, and early embryos.
# Samples are placed in columns with sample stage and sample number indicated. Germinal vesicle oocyte, GV; Metaphase I oocyte, MI; Metaphase II oocyte, MII; zygote, Z; 4-cell embryo, 4C; 8-cell embryo, 8C.
isomiR	GV1	GV2	GV3	GV4	GV5	GV6	MI1	MI2	MI3	MII1	MII2	MII3	Z1	Z2	Z3	Z4	Z5	4C1	4C2	4C3	4C4	4C5	8C1	8C2	8C3	8C4	8C5
hsa-let-7a-3p#NTA(U)	0	0	0	0	0	0	0	0	0	0	0	0	0	0	0	0	0	0	0	0	0	0	14	0	0	0	0
hsa-let-7a-5p#Canonical_RC	12	9	0	0	0	0	4	0	15	40	2	0	0	0	0	0	0	8	18	0	0	0	27	0	15	17	12
hsa-let-7a-5p#lv3pT	13	0	0	0	0	0	12	0	15	0	0	0	14	8	0	0	0	14	33	0	0	0	12	0	0	0	0
hsa-let-7a-5p#NTA(A)	0	0	0	0	0	0	0	0	0	0	0	0	0	0	0	0	0	0	0	0	0	0	23	0	0	0	0
hsa-let-7a-5p#NTA(U)	0	0	0	0	0	0	0	0	0	0	0	0	0	0	0	0	0	0	1	0	0	0	1	0	0	0	0
hsa-let-7b-5p#Canonical_RC	0	6	0	22	0	12	14	0	0	0	0	0	0	0	0	0	0	15	0	0	0	0	7	0	0	10	0
hsa-let-7b-5p#lv3pE	0	0	0	0	0	13	0	0	0	0	0	0	0	0	0	0	0	0	0	0	0	0	0	0	0	0	0
hsa-let-7b-5p#lv3pT	0	14	0	6	0	0	0	0	0	20	0	0	0	14	13	10	0	10	15	14	0	0	0	31	0	0	8
hsa-let-7b-5p#NTA(A)	0	0	0	0	0	0	0	0	0	1	0	0	0	0	0	0	0	0	0	0	0	0	0	0	0	0	0
hsa-let-7c-5p#Canonical_RC	0	12	0	0	0	0	0	0	0	14	0	0	0	0	0	0	0	0	0	0	0	8	0	15	0	0	0
hsa-let-7c-5p#lv3pT	9	1	0	0	0	0	0	0	15	0	0	0	0	0	0	0	0	0	0	0	0	0	12	0	0	0	0
hsa-let-7d-3p#Canonical_RC	0	0	0	0	0	0	0	0	0	0	0	0	0	0	0	0	0	0	0	0	0	0	0	0	0	17	0
hsa-let-7d-3p#lv3pT	0	0	0	0	0	0	0	0	0	20	0	0	0	0	0	0	0	0	0	0	0	0	0	0	0	0	0
hsa-let-7d-3p#mv	0	0	0	0	0	0	0	0	0	16	0	0	0	0	0	0	0	0	0	0	0	0	0	0	0	0	0
hsa-let-7d-5p#lv3pT	0	0	0	0	0	0	0	0	0	0	0	0	0	0	0	0	0	0	0	0	0	0	1	0	0	0	0
hsa-let-7e-5p#Canonical_RC	9	0	0	0	0	0	0	0	0	0	0	0	0	0	0	0	0	0	13	0	0	0	39	0	15	0	0
hsa-let-7e-5p#lv3pE	0	0	0	0	0	15	0	0	0	0	0	0	0	0	0	0	0	0	0	0	0	0	0	0	0	0	0
hsa-let-7e-5p#lv3pT	12	15	0	0	0	0	0	0	0	0	0	0	0	0	0	0	0	0	0	0	0	0	0	0	0	0	0
hsa-let-7e-5p#NTA(U)	5	0	0	0	0	0	0	0	0	0	0	0	0	0	0	0	0	0	0	0	0	0	0	0	0	0	0
hsa-let-7f-5p#Canonical_RC	79	25	8	0	0	13	26	0	31	0	11	50	0	68	0	0	24	75	20	0	16	10	34	5	0	0	13
hsa-let-7f-5p#lv3pE	0	0	7	0	0	0	0	0	0	5	0	0	0	0	0	0	0	18	12	0	0	25	0	0	0	0	0
hsa-let-7f-5p#lv3pT	11	23	0	0	0	0	1	0	4	23	0	0	0	16	0	0	0	18	20	1	0	0	32	0	0	0	0
hsa-let-7f-5p#lv5pT	0	0	0	0	0	0	0	0	0	0	0	0	0	0	0	0	0	22	0	0	0	0	0	0	0	0	0
hsa-let-7f-5p#NTA(A)	0	0	0	0	1	0	0	0	0	0	0	0	0	0	0	0	0	30	0	0	0	0	0	9	0	16	0
hsa-let-7g-5p#Canonical_RC	15	15	0	0	0	0	0	0	0	28	0	0	0	0	0	0	0	0	0	0	0	0	16	0	0	0	0
hsa-let-7g-5p#lv3pE	9	0	0	0	0	4	0	0	0	0	0	0	0	0	0	0	0	0	0	0	0	0	0	0	0	0	0
hsa-let-7g-5p#lv3pT	0	0	0	0	0	0	0	0	0	0	0	0	0	0	0	0	0	0	14	0	0	0	0	0	0	0	0
hsa-let-7g-5p#NTA(A)	0	0	0	0	0	0	0	0	0	0	0	0	0	0	0	0	0	0	11	0	0	0	0	0	0	0	0
hsa-let-7i-5p#Canonical_RC	10	0	0	0	45	24	9	0	0	0	2	18	0	0	16	0	13	0	13	13	6	0	0	0	0	0	0
hsa-let-7i-5p#lv3pT	5	9	0	0	0	0	0	0	0	0	0	14	3	0	0	0	0	0	0	0	0	0	0	0	0	13	0
hsa-let-7i-5p#NTA(A)	0	0	0	0	0	0	0	0	0	0	0	0	10	0	0	0	0	0	0	0	0	0	0	0	0	0	0
hsa-let-7i-5p#NTA(C)	0	0	0	0	0	0	0	0	0	0	0	0	1	0	0	0	0	0	0	0	0	0	0	0	0	0	0
hsa-miR-1-3p#Canonical_RC	0	0	0	0	0	0	0	0	12	0	0	0	0	0	0	0	0	0	7	0	0	0	0	0	0	0	0
hsa-miR-1-3p#lv3pT	0	0	0	0	0	0	0	0	0	30	0	0	13	0	0	0	0	0	0	0	0	0	0	0	0	0	0
hsa-miR-1-3p#NTA(G)	0	0	0	0	0	0	0	0	0	0	0	0	0	0	0	0	0	0	0	0	0	0	17	0	0	0	0
hsa-miR-100-5p#Canonical_RC	135	42	0	10	27	15	31	0	10	33	0	22	10	24	0	21	11	205	57	0	0	18	82	0	0	16	0
hsa-miR-100-5p#lv3pT	16	26	0	0	0	25	0	0	13	39	31	13	4	0	0	1	42	109	28	23	1	0	0	0	0	13	0
hsa-miR-100-5p#mv	0	0	0	2	0	0	0	0	0	0	0	0	0	0	0	0	0	0	1	0	0	0	0	0	0	0	0
hsa-miR-100-5p#NTA(A)	0	0	0	0	0	0	19	0	0	0	0	0	17	0	35	16	31	36	19	1	43	21	66	0	0	0	0
hsa-miR-100-5p#NTA(C)	0	0	0	0	0	0	0	0	0	0	0	0	0	0	0	0	0	1	0	0	0	0	0	0	0	0	0
hsa-miR-100-5p#NTA(U)	15	0	0	0	0	0	0	0	0	0	20	0	0	0	0	0	0	23	0	0	0	0	0	0	0	0	0
hsa-miR-101-3p#Canonical_RC	78	97	11	31	18	28	41	0	0	28	21	0	133	138	0	13	53	246	80	0	0	0	168	17	0	0	35
hsa-miR-101-3p#lv3pE	174	179	0	50	22	19	97	0	0	79	10	59	106	164	84	0	24	464	253	74	0	0	172	74	0	19	0
hsa-miR-101-3p#lv3pT	85	71	24	51	37	37	133	21	84	94	118	26	68	167	16	133	162	199	74	58	14	60	114	73	0	39	46
hsa-miR-101-3p#lv5pE	9	0	0	0	0	0	0	0	19	0	0	0	0	0	0	0	0	53	23	15	0	0	54	0	0	0	0
hsa-miR-101-3p#lv5pT	0	0	0	0	0	0	0	0	0	0	0	0	0	0	0	0	0	0	0	0	0	0	7	0	0	0	0
hsa-miR-101-3p#mv	16	0	8	0	0	0	0	0	0	0	23	22	0	74	0	0	0	19	0	0	0	0	13	0	0	0	0
hsa-miR-101-3p#NTA(A)	0	0	0	24	0	0	18	0	12	0	0	0	62	87	37	0	17	93	96	0	0	17	68	25	0	12	14
hsa-miR-101-3p#NTA(C)	40	46	0	0	0	0	53	18	19	0	0	0	11	49	38	17	41	98	58	0	16	0	44	0	0	0	23
hsa-miR-101-3p#NTA(G)	0	0	0	0	0	0	0	0	0	0	0	0	1	0	0	0	0	0	0	0	0	0	0	0	0	0	0
hsa-miR-101-3p#NTA(U)	60	54	21	0	26	0	45	0	33	62	0	16	90	149	5	17	13	194	71	0	0	12	29	12	0	18	34
hsa-miR-10395-3p#Canonical_RC	0	0	0	0	0	0	0	0	0	0	0	0	0	0	0	0	0	37	0	0	0	0	20	0	0	0	0
hsa-miR-10395-3p#lv5pE	0	0	0	0	0	0	0	0	0	0	0	0	0	0	0	0	0	37	0	0	0	0	0	14	0	0	0
hsa-miR-10395-3p#lv5pT	12	43	0	0	0	0	0	0	0	0	0	0	6	0	0	0	0	12	21	0	0	0	11	0	0	0	0
hsa-miR-10395-3p#mv	0	0	0	0	0	0	0	0	0	0	0	0	0	0	0	0	0	14	0	0	0	0	0	0	0	0	0
hsa-miR-103a-3p#Canonical_RC	0	0	12	0	0	0	0	0	0	0	0	0	0	0	0	0	0	0	0	0	0	0	18	0	0	0	0
hsa-miR-103a-3p#lv3pT	0	0	0	0	31	0	0	0	0	0	0	0	0	0	0	0	0	0	0	0	0	0	0	0	0	0	17
hsa-miR-103a-3p#NTA(A)	0	0	0	0	0	0	0	0	0	0	0	0	16	0	20	0	0	0	0	0	0	0	0	0	0	0	0
hsa-miR-10400-5p#lv5pT	0	0	0	0	0	0	0	0	0	0	0	0	0	0	0	0	0	0	0	1	0	0	0	0	0	0	0
hsa-miR-10400-5p#mv	0	5	0	0	0	0	0	0	0	0	0	0	0	0	0	0	0	0	0	0	0	0	0	0	0	0	0
hsa-miR-105-5p#lv3pT	0	0	0	0	0	0	0	0	0	0	0	0	0	0	0	0	0	0	0	0	0	0	19	0	0	0	0
hsa-miR-106a-5p#Canonical_RC	0	0	0	0	0	0	0	0	0	0	0	0	0	0	0	0	0	0	0	0	0	0	18	0	0	0	0
hsa-miR-106a-5p#lv3pT	0	0	0	0	0	0	1	0	0	0	0	0	0	0	0	0	0	0	0	0	0	0	0	0	0	0	0
hsa-miR-106a-5p#NTA(A)	0	1	0	0	1	0	0	0	0	0	0	1	0	2	1	1	2	0	0	2	1	0	0	2	0	1	0
hsa-miR-106b-3p#lv3pT	0	0	0	0	0	0	0	0	0	0	0	0	0	0	0	0	0	0	0	0	0	0	17	0	0	0	0
hsa-miR-106b-3p#mv	0	0	0	0	0	0	0	0	0	0	0	0	0	0	0	0	0	0	0	0	0	0	0	21	0	0	0
hsa-miR-106b-3p#NTA(A)	0	0	0	0	0	0	0	0	0	0	0	0	0	0	0	0	0	0	0	0	14	0	0	0	0	0	0
hsa-miR-106b-5p#Canonical_RC	0	0	0	0	0	0	16	0	0	0	0	0	0	0	0	0	0	0	0	0	0	0	0	0	0	0	0
hsa-miR-106b-5p#lv3pE	0	0	0	0	0	0	0	0	0	0	0	0	0	0	0	0	0	0	12	0	0	0	0	0	0	0	21
hsa-miR-106b-5p#lv3pT	0	0	0	0	0	0	0	0	0	0	0	0	0	0	2	0	0	0	0	0	0	0	0	0	0	0	0
hsa-miR-107#lv3pT	0	0	0	0	31	0	0	0	0	0	0	0	0	0	0	0	0	0	0	0	0	0	0	0	0	0	0
hsa-miR-107#NTA(A)	0	0	0	0	0	0	0	0	0	0	0	0	16	0	0	0	0	0	0	0	0	0	0	0	0	0	0
hsa-miR-10a-5p#Canonical_RC	0	0	0	0	0	0	0	0	0	0	0	0	0	0	0	0	0	23	66	0	0	0	40	0	0	0	0
hsa-miR-10a-5p#lv3pT	0	0	0	0	0	0	0	0	0	0	0	0	0	0	0	0	0	0	0	0	0	0	98	0	0	0	0
hsa-miR-10a-5p#lv5pT	0	0	0	0	0	0	0	0	0	0	0	0	0	0	0	0	0	14	40	0	0	0	98	0	0	0	0
hsa-miR-10a-5p#mv	0	0	0	0	0	0	0	0	0	0	0	0	0	0	0	0	0	0	0	0	8	0	0	0	0	0	0
hsa-miR-10a-5p#NTA(A)	0	0	0	0	0	0	0	0	0	0	0	0	0	0	1	0	0	0	0	0	0	0	0	0	0	0	0
hsa-miR-10b-5p#Canonical_RC	0	0	0	0	0	0	0	0	0	0	0	0	0	36	0	0	25	0	45	0	0	0	170	0	0	0	0
hsa-miR-10b-5p#lv3pT	20	0	0	0	0	0	0	0	0	21	0	0	0	0	0	0	0	0	65	0	20	0	97	0	0	23	0
hsa-miR-10b-5p#lv5pT	0	0	0	0	0	0	0	0	0	0	0	0	0	0	0	0	0	27	0	0	0	0	60	0	0	0	0
hsa-miR-10b-5p#mv	0	25	0	0	0	0	0	0	0	0	0	0	0	0	0	0	0	0	23	0	0	0	12	0	0	24	0
hsa-miR-10b-5p#NTA(A)	1	0	0	0	0	11	0	0	0	0	0	0	0	0	0	18	0	32	17	0	0	0	1	10	0	0	0
hsa-miR-10b-5p#NTA(C)	0	0	0	0	0	0	0	0	0	0	0	0	0	0	0	0	0	0	0	0	0	0	1	0	0	0	0
hsa-miR-1180-3p#Canonical_RC	0	0	0	0	0	12	0	0	0	21	0	0	0	0	0	0	0	33	0	0	0	0	8	15	0	0	0
hsa-miR-1180-3p#NTA(A)	0	0	0	0	0	0	0	0	0	0	0	0	0	0	20	0	0	0	0	0	0	0	0	0	0	0	0
hsa-miR-1180-3p#NTA(G)	0	0	0	0	0	0	0	0	0	0	0	0	0	1	0	0	0	0	0	0	0	0	0	0	0	0	0
hsa-miR-1180-3p#NTA(U)	0	0	0	0	0	0	3	0	0	0	0	25	0	0	0	0	0	0	0	0	0	0	0	0	0	0	0
hsa-miR-12135#lv5pT	0	0	0	0	0	0	18	0	0	0	0	0	0	0	0	0	0	0	0	0	0	0	0	0	0	0	0
hsa-miR-12135#mv	0	0	0	0	0	0	0	0	0	20	0	0	0	0	0	0	0	0	0	0	0	0	0	0	0	0	0
hsa-miR-12136#Canonical_RC	0	0	0	0	0	0	0	0	0	0	0	0	0	0	0	0	0	23	0	0	0	0	0	0	0	0	0
hsa-miR-12136#lv3pE	12	37	0	0	31	0	0	0	0	15	0	0	59	24	0	0	0	186	32	0	0	0	0	0	0	0	0
hsa-miR-12136#lv3pT	0	0	0	14	0	0	0	0	0	0	0	0	0	0	0	0	0	24	0	0	0	0	19	0	0	0	0
hsa-miR-122-5p#Canonical_RC	0	0	0	0	0	0	0	0	0	0	0	0	0	0	0	0	0	0	0	0	0	0	16	0	0	0	0
hsa-miR-122-5p#lv3pT	0	0	0	0	0	0	0	0	0	0	0	0	0	0	0	0	0	0	0	0	0	0	0	0	0	12	0
hsa-miR-1226-3p#NTA(C)	7	0	0	0	0	0	0	0	0	0	0	0	0	0	0	0	0	0	0	0	0	0	0	0	0	0	0
hsa-miR-1226-5p#NTA(A)	0	9	0	0	0	0	0	0	0	0	0	0	0	0	0	0	0	0	0	0	0	0	0	0	0	0	0
hsa-miR-1229-3p#mv	0	0	0	0	0	52	17	0	0	0	0	0	0	0	0	0	0	0	0	0	0	0	12	15	0	0	0
hsa-miR-1229-3p#NTA(A)	0	0	0	0	0	0	0	0	0	0	0	0	0	0	18	0	0	20	12	0	0	0	15	0	0	0	0
hsa-miR-1229-3p#NTA(C)	0	0	0	0	0	0	0	0	0	0	0	0	0	0	0	0	15	18	0	0	0	0	0	0	0	0	0
hsa-miR-1229-3p#NTA(U)	0	9	0	0	0	0	0	0	15	0	0	0	0	0	0	0	0	0	0	0	0	0	0	0	0	0	0
hsa-miR-122b-3p#mv	0	0	0	0	0	0	0	0	0	0	0	0	0	0	0	0	0	0	9	0	0	0	0	0	0	0	0
hsa-miR-122b-5p#Canonical_RC	0	0	0	0	0	0	0	0	0	0	0	0	17	0	0	0	0	0	3	0	0	0	0	0	0	0	0
hsa-miR-122b-5p#lv3pT	0	0	0	0	0	0	0	0	0	0	0	0	0	0	0	0	0	47	0	0	23	0	0	0	0	0	0
hsa-miR-1244#lv5pE	14	0	0	0	0	0	0	0	0	0	0	0	12	30	0	0	0	0	0	0	0	0	0	0	0	0	0
hsa-miR-1244#NTA(G)	0	0	0	0	0	0	0	0	0	0	0	0	1	0	0	0	0	0	0	0	0	0	0	0	0	0	0
hsa-miR-1246#mv	0	0	0	0	0	0	0	0	0	0	0	0	0	1	0	0	0	2	0	0	0	0	1	0	0	0	0
hsa-miR-1246#NTA(G)	0	0	0	0	0	0	0	0	0	0	0	0	0	0	0	0	0	0	0	0	0	0	1	0	0	0	0
hsa-miR-1248#lv3pE	0	0	0	0	0	0	0	0	0	0	0	0	9	0	0	0	0	0	0	0	0	0	0	0	0	0	0
hsa-miR-1248#lv3pT	0	0	0	0	0	0	0	0	0	0	0	0	0	0	0	0	0	0	0	0	0	0	29	0	0	0	0
hsa-miR-1249-3p#NTA(C)	0	0	0	0	0	0	0	0	0	1	0	0	0	0	0	0	0	0	0	0	0	0	0	0	0	0	0
hsa-miR-1255a#Canonical_RC	0	0	0	0	0	0	0	0	0	0	0	0	0	0	0	0	0	0	0	0	0	0	77	0	24	0	0
hsa-miR-1255a#lv3pT	0	0	0	0	0	0	0	0	0	0	0	0	0	0	0	0	0	0	0	0	0	0	1	0	0	0	0
hsa-miR-125a-5p#Canonical_RC	0	0	0	0	0	0	0	12	0	0	0	0	0	12	0	0	0	29	0	0	0	0	61	0	0	0	0
hsa-miR-125a-5p#lv3pT	0	32	0	10	0	33	5	9	0	0	0	0	13	0	0	0	0	32	0	23	0	0	11	0	0	0	0
hsa-miR-125a-5p#NTA(C)	0	0	0	0	0	0	0	0	0	0	0	0	0	0	0	0	0	23	0	0	0	0	0	0	0	0	0
hsa-miR-125a-5p#NTA(U)	9	0	0	0	0	0	0	0	0	0	0	0	0	0	0	0	0	0	0	0	0	0	0	0	0	0	0
hsa-miR-125b-2-3p#Canonical_RC	10	0	0	0	0	0	0	0	0	0	0	0	0	0	0	0	0	0	0	0	0	0	0	0	0	0	0
hsa-miR-125b-2-3p#lv5pT	23	0	0	0	0	0	0	0	0	0	0	0	0	0	0	0	0	0	0	0	0	0	0	0	0	0	0
hsa-miR-125b-2-3p#mv	0	0	0	0	0	0	0	0	0	0	0	0	0	0	0	0	0	9	0	0	0	0	2	0	0	0	0
hsa-miR-125b-2-3p#NTA(A)	0	0	0	0	0	0	0	0	0	0	0	0	0	0	0	0	0	0	0	0	0	0	13	0	0	0	0
hsa-miR-125b-5p#Canonical_RC	0	0	0	16	0	15	23	0	0	0	0	0	9	14	0	0	0	0	0	0	15	0	21	0	0	0	0
hsa-miR-125b-5p#lv3pE	16	0	0	0	0	0	0	0	0	0	0	0	0	0	0	0	0	0	0	0	0	0	0	0	0	0	0
hsa-miR-125b-5p#lv3pT	0	15	0	0	26	12	0	0	0	0	0	25	20	0	0	0	0	28	15	10	0	18	0	0	11	0	11
hsa-miR-125b-5p#NTA(A)	0	0	0	0	0	13	0	0	0	0	0	0	0	12	0	0	0	27	15	0	0	8	48	0	0	0	0
hsa-miR-125b-5p#NTA(C)	0	0	0	0	0	0	0	0	0	0	0	0	0	0	0	0	0	0	11	0	0	0	0	0	0	0	0
hsa-miR-126-3p#Canonical_RC	0	0	4	0	0	0	13	0	14	0	0	0	0	20	0	19	25	31	0	0	0	0	0	0	0	14	5
hsa-miR-126-3p#lv3pT	0	7	0	0	9	0	18	0	61	0	14	0	0	0	34	23	31	0	32	0	0	13	0	0	17	17	40
hsa-miR-126-3p#NTA(U)	0	0	0	0	0	0	23	0	0	0	0	5	0	0	15	1	0	0	0	0	0	0	0	13	0	0	0
hsa-miR-1260a#lv3pE	0	0	0	0	0	0	0	0	0	0	0	0	0	0	0	0	0	0	0	0	0	0	0	0	0	0	11
hsa-miR-1260a#mv	0	0	0	0	0	0	0	0	0	0	0	0	0	0	0	0	0	0	0	19	0	0	0	0	0	0	0
hsa-miR-1260a#NTA(A)	0	0	0	0	0	0	0	0	0	0	0	0	0	0	0	0	0	0	0	0	0	0	0	0	15	15	0
hsa-miR-1260a#NTA(C)	0	0	0	0	0	0	0	0	0	0	0	0	0	0	0	0	0	0	0	0	0	0	0	0	0	0	12
hsa-miR-1260b#lv3pT	0	6	0	0	0	0	0	0	0	0	0	8	0	24	7	16	0	0	0	0	0	0	35	0	0	0	13
hsa-miR-1262#lv5pE	0	0	0	0	0	0	0	0	0	0	0	0	0	20	0	0	0	0	0	0	0	0	0	0	0	0	0
hsa-miR-1262#mv	0	0	0	0	0	0	0	0	0	0	0	0	0	1	0	0	0	0	0	0	0	0	14	0	0	0	0
hsa-miR-1263#Canonical_RC	0	19	0	0	0	0	0	0	0	0	0	0	0	11	20	0	0	12	0	0	0	0	0	0	0	0	0
hsa-miR-1263#lv3pT	0	0	0	0	0	0	17	0	0	0	0	0	0	0	0	0	0	0	0	0	0	0	0	0	0	0	0
hsa-miR-127-3p#NTA(A)	0	0	0	0	0	0	0	0	0	0	0	0	0	0	0	0	0	0	0	0	0	0	1	0	0	0	0
hsa-miR-127-5p#mv	0	0	0	0	1	0	0	0	0	1	0	0	0	0	0	0	0	0	0	0	0	0	0	0	0	0	0
hsa-miR-1273h-3p#Canonical_RC	0	0	0	0	0	0	0	0	0	0	0	0	0	0	0	0	0	0	0	0	0	0	13	0	0	0	16
hsa-miR-1276#lv3pE	0	0	0	0	0	0	0	0	0	0	0	0	0	0	0	0	0	0	0	0	0	0	21	0	0	0	0
hsa-miR-1276#NTA(A)	0	0	0	0	0	0	0	0	0	0	0	0	0	0	0	0	0	0	0	0	0	0	1	0	0	0	0
hsa-miR-1278#Canonical_RC	0	0	0	0	0	0	0	0	0	0	23	0	0	15	18	0	0	0	0	0	0	0	22	16	17	0	0
hsa-miR-1278#NTA(A)	0	0	0	0	0	0	0	0	0	0	0	0	0	17	0	0	0	0	0	0	0	0	0	0	0	0	0
hsa-miR-128-3p#Canonical_RC	59	45	0	51	30	24	106	0	11	16	0	50	0	0	0	0	0	23	0	0	0	0	252	17	77	0	0
hsa-miR-128-3p#lv3pE	8	16	0	0	0	34	0	23	0	19	19	0	0	0	0	0	0	31	13	0	0	0	0	10	0	0	0
hsa-miR-128-3p#lv3pT	19	0	0	0	0	0	9	0	33	0	5	18	0	0	0	0	0	0	0	0	0	0	0	0	14	0	35
hsa-miR-128-3p#NTA(A)	0	0	0	14	0	0	29	0	16	40	33	45	98	53	226	77	108	137	136	63	102	69	254	56	0	34	9
hsa-miR-128-3p#NTA(C)	0	0	0	0	0	0	25	0	0	14	0	0	0	0	0	0	0	0	0	0	0	0	0	0	0	0	0
hsa-miR-128-3p#NTA(G)	0	0	0	1	0	0	0	0	0	0	0	0	32	0	0	0	25	0	0	0	7	20	15	0	0	0	0
hsa-miR-128-3p#NTA(U)	0	0	0	0	0	0	0	0	0	0	0	0	0	0	0	0	0	0	0	0	0	18	0	0	0	0	0
hsa-miR-1283#Canonical_RC	0	0	0	0	0	0	0	0	0	0	0	0	0	0	0	15	0	0	0	0	0	0	0	0	0	0	0
hsa-miR-1283#mv	0	0	0	0	21	0	16	0	0	0	0	0	0	0	0	0	0	0	0	0	0	0	0	15	0	0	0
hsa-miR-1283#NTA(A)	0	0	0	0	0	0	0	0	0	0	0	0	0	0	0	0	0	0	0	0	0	0	18	0	0	0	0
hsa-miR-1284#lv5pT	0	0	0	0	0	0	0	0	0	0	0	0	0	0	0	0	0	13	0	0	0	0	0	0	0	0	0
hsa-miR-129-5p#Canonical_RC	0	0	0	0	0	0	0	0	0	0	0	0	0	0	0	0	0	13	73	0	0	20	34	0	14	0	0
hsa-miR-129-5p#NTA(A)	0	0	0	0	0	0	0	0	0	0	0	0	0	0	0	0	0	60	1	0	0	0	0	0	0	0	0
hsa-miR-1290#NTA(G)	0	1	0	0	0	0	0	0	0	0	0	0	0	0	0	0	0	0	0	0	0	0	0	0	0	0	0
hsa-miR-1291#lv3pE	10	0	0	0	0	0	0	0	0	0	0	0	5	0	0	0	0	0	0	0	0	0	0	0	0	0	0
hsa-miR-1291#mv	0	13	0	0	0	3	0	0	0	0	17	0	11	0	0	0	0	0	0	0	0	0	0	0	0	0	0
hsa-miR-1291#NTA(C)	1	0	0	0	0	0	0	0	0	0	0	0	0	0	0	0	0	0	0	0	0	0	0	0	0	0	0
hsa-miR-1295a#Canonical_RC	0	0	0	11	0	0	12	0	0	15	0	0	0	10	0	0	0	0	0	0	0	0	0	0	0	0	9
hsa-miR-1295a#lv3pE	0	0	0	0	0	0	20	0	0	0	0	17	0	0	0	0	0	0	0	0	0	0	55	0	0	0	0
hsa-miR-1295a#lv3pT	14	0	0	0	0	0	0	0	0	0	0	0	0	0	0	0	0	0	0	0	0	0	0	0	0	0	0
hsa-miR-1295a#NTA(U)	15	0	0	0	0	0	43	0	0	0	0	35	0	0	0	0	0	0	0	0	0	0	0	0	0	0	0
hsa-miR-1296-5p#NTA(A)	0	0	0	0	0	0	0	0	0	0	0	0	16	0	0	0	0	0	0	0	0	0	0	0	0	0	0
hsa-miR-1298-5p#Canonical_RC	71	11	0	55	22	3	18	0	0	0	85	90	33	52	81	25	16	71	0	0	0	0	0	0	0	0	0
hsa-miR-1298-5p#lv3pT	86	37	11	24	58	28	17	0	11	74	13	27	78	165	31	12	0	41	36	0	0	0	0	0	0	0	0
hsa-miR-1298-5p#lv5pT	40	0	0	0	7	0	23	0	0	0	19	20	31	11	0	0	11	0	0	0	0	0	0	0	0	0	0
hsa-miR-1298-5p#mv	15	0	0	35	18	27	0	0	0	17	0	0	37	38	0	0	13	1	0	0	0	16	0	0	0	0	4
hsa-miR-1298-5p#NTA(A)	1	0	0	0	12	14	0	0	0	14	0	0	5	1	0	0	0	0	10	0	0	0	0	19	0	0	0
hsa-miR-1307-3p#lv3pE	0	0	0	0	0	0	0	0	0	0	0	0	0	0	0	0	0	0	25	0	0	0	89	79	16	20	0
hsa-miR-1307-3p#mv	0	0	0	0	0	0	0	0	0	0	0	0	0	0	0	0	0	0	17	0	0	0	95	18	0	0	14
hsa-miR-1307-3p#NTA(A)	0	0	0	13	0	0	0	0	0	0	0	0	0	0	0	0	0	0	0	0	0	12	0	1	0	0	0
hsa-miR-1307-3p#NTA(U)	0	0	0	0	0	0	0	0	0	0	0	0	0	0	9	0	0	0	0	0	0	0	16	0	0	0	0
hsa-miR-1307-5p#lv3pT	0	0	0	0	0	0	0	0	0	0	0	0	14	0	0	0	0	0	0	0	0	0	0	0	0	0	0
hsa-miR-130b-5p#Canonical_RC	0	0	0	0	0	0	0	0	0	0	7	0	10	16	0	0	0	0	0	0	0	0	16	0	0	0	0
hsa-miR-130b-5p#lv3pE	0	0	0	0	0	21	35	0	0	0	0	0	22	0	24	0	0	0	0	0	0	0	54	0	0	0	12
hsa-miR-130b-5p#lv3pT	9	0	0	0	0	0	0	0	0	0	0	0	0	0	0	0	0	0	0	0	0	0	0	0	0	0	0
hsa-miR-132-3p#Canonical_RC	0	0	0	0	0	0	0	0	0	0	0	0	0	0	0	0	0	0	0	0	0	0	2	0	0	0	0
hsa-miR-132-3p#lv3pT	0	0	0	25	0	0	0	0	0	0	0	0	0	0	0	0	0	0	0	0	0	0	0	0	0	0	0
hsa-miR-132-3p#NTA(A)	0	0	0	0	0	0	0	0	0	0	0	0	0	0	0	0	20	0	0	0	0	0	0	0	0	0	0
hsa-miR-132-3p#NTA(U)	0	0	20	0	0	0	0	0	0	0	20	0	0	0	0	0	0	0	0	18	0	0	19	0	0	0	0
hsa-miR-132-5p#Canonical_RC	0	0	35	0	0	0	16	0	0	0	0	0	0	0	32	0	0	6	0	3	0	0	11	0	0	0	0
hsa-miR-132-5p#lv3pT	0	0	0	0	0	29	0	0	16	0	0	0	11	0	0	0	0	19	0	10	29	19	80	0	0	0	12
hsa-miR-132-5p#lv5pE	0	0	0	0	1	0	0	0	0	0	0	4	0	0	0	0	16	0	0	0	0	0	0	0	0	0	0
hsa-miR-132-5p#mv	0	0	5	20	17	0	40	0	8	0	0	22	0	34	39	0	0	29	0	26	13	0	0	1	0	0	9
hsa-miR-132-5p#NTA(A)	0	0	0	0	0	0	0	0	0	0	0	0	0	0	0	0	0	0	0	9	0	0	0	0	0	0	0
hsa-miR-132-5p#NTA(G)	0	0	0	0	0	0	0	0	0	0	0	0	0	0	0	0	0	0	0	0	0	0	20	0	0	0	0
hsa-miR-1323#Canonical_RC	0	0	0	0	19	0	36	0	0	18	0	13	0	16	0	0	11	50	0	0	28	0	154	0	33	0	41
hsa-miR-1323#lv3pT	15	58	0	43	0	0	9	10	0	9	17	23	22	10	0	11	0	12	0	0	0	0	0	0	0	20	15
hsa-miR-1323#NTA(A)	0	0	0	0	0	0	0	0	0	0	0	0	0	0	30	0	50	24	0	0	0	0	1	0	0	0	0
hsa-miR-134-5p#Canonical_RC	0	0	0	0	0	0	0	0	0	0	0	0	0	0	0	0	0	7	0	0	0	0	19	0	0	0	0
hsa-miR-135b-5p#Canonical_RC	0	0	0	0	0	0	0	0	0	0	0	0	0	0	0	0	0	0	0	0	0	0	24	0	0	0	0
hsa-miR-138-5p#lv3pT	0	0	0	4	0	0	0	0	0	0	0	0	0	0	0	0	0	0	0	0	0	0	0	0	0	0	0
hsa-miR-139-3p#Canonical_RC	0	0	0	0	0	0	0	0	0	0	0	0	0	0	0	0	0	0	0	0	0	0	13	0	0	0	0
hsa-miR-139-5p#lv3pT	0	0	0	0	0	0	0	0	0	0	0	0	0	0	0	0	0	0	4	0	0	0	0	0	0	0	0
hsa-miR-139-5p#NTA(A)	0	0	0	0	0	0	0	0	0	0	0	0	0	0	0	0	0	0	0	0	0	0	26	0	0	0	0
hsa-miR-140-3p#Canonical_RC	13	0	0	0	18	0	0	0	0	0	0	0	0	0	0	0	0	0	23	0	0	0	0	0	0	0	0
hsa-miR-140-3p#lv3pE	28	0	0	0	0	0	18	0	0	12	0	0	0	0	0	0	0	0	21	0	0	0	0	0	0	0	0
hsa-miR-140-3p#lv3pT	0	0	0	0	10	0	0	0	0	0	0	0	0	0	0	0	0	0	0	0	0	0	0	0	0	0	0
hsa-miR-140-3p#lv5pT	7	0	0	0	0	0	0	0	0	0	0	0	12	0	0	0	0	0	0	0	0	0	0	0	0	0	0
hsa-miR-140-3p#mv	35	15	0	0	40	0	0	0	0	0	0	0	0	17	0	0	18	0	0	0	0	0	10	0	0	0	0
hsa-miR-140-3p#NTA(A)	0	0	0	0	0	0	0	0	0	0	0	0	0	0	0	0	0	0	0	0	0	0	0	18	0	0	0
hsa-miR-140-3p#NTA(U)	0	18	0	0	20	0	0	0	0	0	0	26	0	0	0	0	0	0	0	0	0	0	0	0	0	0	0
hsa-miR-140-5p#Canonical_RC	0	0	0	0	0	0	0	0	0	0	0	0	12	0	0	0	21	0	0	0	0	0	0	0	0	0	0
hsa-miR-140-5p#lv3pE	0	0	0	0	0	0	0	0	0	0	0	0	0	0	0	0	0	0	0	0	0	0	0	14	0	0	0
hsa-miR-140-5p#lv3pT	0	0	0	5	0	0	0	0	0	0	0	0	0	0	0	0	0	0	0	0	0	0	0	0	0	0	0
hsa-miR-140-5p#NTA(A)	0	0	0	0	0	0	0	0	0	0	0	0	0	0	0	0	0	0	23	0	0	0	0	0	0	0	0
hsa-miR-141-5p#lv5pT	0	0	0	0	0	0	0	0	0	0	0	0	0	0	0	0	23	0	0	0	0	0	0	0	0	0	0
hsa-miR-142-5p#mv	0	0	0	0	0	0	0	0	0	13	0	0	0	0	0	0	0	0	0	0	0	0	0	0	0	0	0
hsa-miR-143-3p#Canonical_RC	25	0	0	0	0	0	0	0	0	0	0	0	0	0	0	0	21	0	0	0	0	0	8	0	0	0	0
hsa-miR-143-3p#lv3pT	0	0	0	0	0	0	0	0	0	0	0	0	0	0	0	0	0	0	0	0	0	0	0	0	0	23	0
hsa-miR-143-3p#NTA(U)	15	0	0	0	0	0	0	0	0	0	0	0	0	0	0	0	0	14	0	0	0	0	0	0	0	0	0
hsa-miR-146a-5p#Canonical_RC	0	15	0	29	27	0	15	8	0	35	0	39	0	0	0	20	0	33	0	0	0	0	16	13	0	0	0
hsa-miR-146a-5p#lv3pE	0	0	0	0	0	0	0	0	0	18	0	0	0	0	0	0	0	0	16	0	0	0	21	0	0	0	0
hsa-miR-146a-5p#lv3pT	29	16	0	22	33	0	0	0	0	0	10	20	0	54	11	1	0	9	17	0	0	0	15	0	0	0	0
hsa-miR-146a-5p#NTA(A)	9	0	0	0	0	0	0	0	0	0	0	0	9	18	0	9	2	21	13	0	0	0	0	12	0	0	0
hsa-miR-146a-5p#NTA(C)	0	0	0	0	0	0	0	0	0	0	0	0	0	0	18	18	0	0	0	0	0	0	0	0	0	0	0
hsa-miR-146a-5p#NTA(U)	0	0	0	0	0	0	0	0	0	0	0	0	0	0	0	0	0	18	0	16	0	0	0	0	0	0	0
hsa-miR-146b-3p#Canonical_RC	0	0	0	0	0	0	0	0	0	0	0	0	0	0	0	0	0	0	26	0	0	0	0	0	0	0	0
hsa-miR-146b-3p#NTA(A)	0	0	0	0	0	0	0	0	0	0	0	0	0	0	0	0	0	0	0	0	0	13	0	0	0	0	0
hsa-miR-146b-5p#Canonical_RC	0	18	0	0	0	0	0	0	0	0	0	22	0	0	0	0	36	34	20	19	0	0	85	0	0	0	0
hsa-miR-146b-5p#lv3pE	22	47	0	0	0	0	0	0	0	19	0	0	0	12	0	0	0	164	310	0	21	0	588	54	10	0	0
hsa-miR-146b-5p#NTA(A)	0	0	0	0	0	0	0	0	0	0	0	0	0	0	0	0	0	0	0	0	0	0	1	0	0	0	4
hsa-miR-146b-5p#NTA(G)	0	0	0	0	0	0	0	0	0	0	0	0	0	0	0	0	0	1	0	0	0	0	0	0	0	0	0
hsa-miR-146b-5p#NTA(U)	0	0	0	0	0	0	0	0	0	0	0	0	0	0	0	0	0	0	1	0	0	0	0	0	0	0	0
hsa-miR-148a-3p#Canonical_RC	1993	1074	1014	1953	1282	1304	3701	227	2288	3778	3043	2498	958	1470	2727	1722	2289	4585	2415	1153	1276	0	5370	2026	902	1611	2452
hsa-miR-148a-3p#lv3pE	122	73	11	68	13	11	70	17	55	64	79	73	38	63	0	0	17	94	80	18	28	0	139	22	24	0	14
hsa-miR-148a-3p#lv3pT	0	0	0	23	0	0	0	0	0	0	0	0	0	0	0	0	20	38	0	0	0	0	45	0	15	0	0
hsa-miR-148a-3p#lv5pT	0	0	0	0	0	0	0	0	0	0	0	0	0	0	0	0	0	31	0	0	0	0	0	23	0	0	0
hsa-miR-148a-3p#mv	0	0	0	0	0	0	0	0	0	0	0	0	0	0	0	0	0	0	0	0	0	0	15	0	0	0	0
hsa-miR-148a-3p#NTA(A)	34	3	0	0	3	2	2	0	2	6	5	5	93	66	3	48	11	294	70	13	2	0	287	164	4	19	20
hsa-miR-148a-3p#NTA(C)	0	0	0	0	0	0	0	0	1	0	0	1	0	0	13	0	0	0	0	0	0	0	0	0	0	0	1
hsa-miR-148a-3p#NTA(G)	1	0	0	0	0	0	0	0	0	0	0	0	0	1	1	0	0	0	1	0	0	0	2	0	0	0	0
hsa-miR-148a-3p#NTA(U)	1	0	0	0	0	1	1	0	0	0	0	0	3	0	0	0	1	3	16	1	7	0	2	2	1	0	1
hsa-miR-148a-5p#Canonical_RC	0	0	0	0	0	0	17	0	15	0	0	0	0	0	0	0	0	18	0	0	23	0	0	0	0	0	6
hsa-miR-148a-5p#lv5pE	0	0	0	0	0	0	0	0	0	0	0	0	0	0	0	0	0	0	0	0	0	0	24	0	0	0	0
hsa-miR-148b-3p#Canonical_RC	0	0	0	0	0	0	0	0	0	0	0	0	0	0	0	0	0	17	0	0	0	0	30	0	0	0	0
hsa-miR-148b-3p#lv3pT	0	0	0	0	0	0	0	0	0	0	0	0	0	0	0	0	0	0	0	0	0	0	21	0	0	0	0
hsa-miR-148b-3p#NTA(A)	0	0	0	0	0	0	0	0	0	0	0	0	0	0	0	0	14	0	19	0	0	0	0	0	0	0	0
hsa-miR-148b-3p#NTA(U)	0	0	0	0	0	0	0	0	0	0	0	0	0	0	0	0	0	0	0	0	0	0	0	18	0	0	0
hsa-miR-149-5p#Canonical_RC	0	0	2	0	0	0	0	0	0	0	0	13	0	0	0	0	0	0	0	0	0	0	0	0	0	0	0
hsa-miR-149-5p#lv3pT	10	20	0	0	73	0	0	0	6	0	19	0	0	0	0	0	0	0	0	0	0	0	0	0	0	0	0
hsa-miR-149-5p#NTA(A)	0	0	0	0	0	0	0	0	0	0	0	23	6	0	5	0	0	0	0	0	10	0	0	0	0	0	0
hsa-miR-149-5p#NTA(U)	0	0	0	0	0	0	0	0	0	0	0	0	0	17	0	0	0	0	0	0	0	0	0	0	0	0	0
hsa-miR-151a-3p#Canonical_RC	100	14	88	157	84	93	261	20	183	171	112	126	27	0	116	53	83	52	45	53	86	82	88	32	78	57	69
hsa-miR-151a-3p#lv3pE	118	21	39	68	74	43	127	13	59	113	37	54	11	30	27	0	56	87	82	15	18	30	81	17	15	15	16
hsa-miR-151a-3p#lv3pT	42	15	0	42	0	0	19	0	0	45	25	0	0	0	0	0	0	19	20	0	0	0	18	0	0	0	0
hsa-miR-151a-3p#lv5pE	58	62	2	68	22	47	109	0	69	6	73	44	25	0	0	37	18	35	37	0	0	0	67	15	14	0	0
hsa-miR-151a-3p#mv	61	26	0	121	24	0	75	23	0	22	38	0	77	129	39	48	35	41	121	39	12	0	0	0	44	45	24
hsa-miR-151a-3p#NTA(A)	60	48	14	51	36	52	209	0	61	55	51	50	463	535	274	167	319	1037	494	206	203	124	565	51	12	72	53
hsa-miR-151a-3p#NTA(C)	0	0	0	30	0	0	0	0	11	0	0	0	39	25	0	17	0	28	0	0	0	0	0	0	0	0	0
hsa-miR-151a-3p#NTA(G)	0	0	0	1	1	2	0	0	14	0	0	0	30	14	0	0	0	0	0	0	0	0	22	0	0	0	16
hsa-miR-151a-3p#NTA(U)	527	223	56	279	349	140	445	58	411	200	175	268	252	458	42	210	94	230	244	95	94	82	120	32	0	61	117
hsa-miR-151a-5p#Canonical_RC	28	27	0	0	0	0	13	0	0	19	0	20	18	15	0	0	14	35	0	34	0	0	32	0	0	0	0
hsa-miR-151a-5p#lv3pE	0	0	0	0	0	0	0	0	0	21	0	0	15	0	0	0	0	0	0	0	0	0	0	22	0	0	0
hsa-miR-151a-5p#lv3pT	0	0	0	0	0	0	0	0	0	0	0	0	0	0	0	0	0	0	0	0	0	0	0	18	0	0	0
hsa-miR-151a-5p#mv	0	0	0	0	0	0	0	0	0	19	0	0	15	0	0	0	0	0	0	0	0	0	0	0	0	0	0
hsa-miR-151a-5p#NTA(A)	0	0	0	0	0	0	0	0	0	0	0	0	13	0	0	0	0	0	0	0	0	0	0	0	0	0	0
hsa-miR-151b#lv3pE	0	0	0	0	0	0	0	0	0	0	0	0	0	0	0	0	0	0	0	1	0	0	0	18	0	0	0
hsa-miR-151b#mv	0	0	0	0	0	0	0	0	0	0	0	0	15	0	0	0	0	0	0	0	0	0	0	0	0	0	0
hsa-miR-152-3p#Canonical_RC	0	0	0	0	0	0	0	0	0	0	0	0	0	0	0	0	0	0	0	7	0	0	0	0	0	0	0
hsa-miR-152-3p#lv3pE	0	0	0	0	0	0	0	12	0	0	0	0	0	0	0	0	0	0	0	0	0	0	0	0	0	15	0
hsa-miR-152-3p#NTA(A)	0	0	0	0	0	0	0	0	0	0	0	0	14	0	0	0	0	0	0	0	0	0	46	0	0	0	0
hsa-miR-152-3p#NTA(U)	8	0	0	0	0	0	0	0	0	0	0	0	0	0	0	0	0	0	0	0	0	0	0	0	0	0	0
hsa-miR-153-3p#Canonical_RC	0	0	0	0	0	0	12	0	0	0	0	0	9	0	0	0	0	0	0	0	0	0	0	0	0	0	0
hsa-miR-155-5p#Canonical_RC	0	0	0	0	0	0	0	0	0	0	0	0	0	0	0	0	0	0	15	0	0	0	0	0	0	0	0
hsa-miR-155-5p#lv3pT	0	0	0	15	0	14	0	2	0	20	10	20	0	0	40	0	5	0	0	22	0	0	0	0	13	0	10
hsa-miR-155-5p#mv	0	0	0	27	20	41	84	20	15	50	61	0	0	0	16	0	19	0	0	61	23	75	0	0	35	18	18
hsa-miR-155-5p#NTA(U)	0	0	0	0	0	0	0	0	0	0	0	0	0	0	1	0	0	0	0	0	0	0	0	0	0	0	0
hsa-miR-15a-5p#lv3pE	0	0	0	0	0	0	0	0	0	0	0	0	0	0	0	0	0	0	0	0	0	0	23	0	0	0	0
hsa-miR-15b-3p#lv3pT	0	22	0	0	0	0	0	0	0	0	0	0	0	0	0	0	0	0	0	0	0	0	0	0	0	0	0
hsa-miR-16-2-3p#Canonical_RC	6	0	29	0	0	0	39	0	0	37	0	0	0	0	0	0	0	0	8	0	12	0	114	32	20	0	0
hsa-miR-16-2-3p#lv3pT	29	0	0	0	0	0	0	0	0	0	0	0	0	0	0	0	0	0	21	0	0	0	0	0	0	0	29
hsa-miR-16-2-3p#lv5pE	14	0	7	0	16	0	21	0	34	0	13	15	40	31	42	75	0	89	43	35	15	0	62	22	1	0	24
hsa-miR-16-2-3p#mv	82	112	12	18	58	0	91	8	10	37	76	14	53	87	25	0	75	146	24	2	36	0	83	35	22	0	37
hsa-miR-16-2-3p#NTA(A)	1	0	0	0	1	0	1	0	0	0	0	0	28	0	41	48	0	95	16	14	8	0	103	0	20	0	0
hsa-miR-16-2-3p#NTA(C)	22	0	0	0	0	0	0	0	0	0	0	0	29	0	0	23	0	0	19	0	0	0	0	0	0	0	0
hsa-miR-16-2-3p#NTA(G)	0	0	0	0	0	0	0	0	0	0	0	0	11	0	36	0	15	0	23	0	0	0	0	0	22	12	0
hsa-miR-16-2-3p#NTA(U)	0	0	0	0	0	0	0	0	0	0	0	0	9	20	0	0	27	0	0	0	0	0	16	0	0	0	0
hsa-miR-16-5p#Canonical_RC	0	0	0	0	18	0	0	15	32	0	9	0	0	0	0	0	0	0	0	0	0	0	0	0	0	0	0
hsa-miR-16-5p#lv3pE	24	0	0	0	21	16	20	0	0	30	0	21	0	0	18	0	0	17	0	0	0	0	17	0	0	0	0
hsa-miR-16-5p#lv3pT	15	12	0	21	0	0	37	9	16	54	30	15	0	0	22	0	44	24	0	0	0	0	0	0	34	0	2
hsa-miR-16-5p#NTA(A)	0	0	0	0	0	0	0	0	0	15	0	0	0	0	0	0	0	0	0	0	0	0	15	0	0	0	0
hsa-miR-16-5p#NTA(G)	0	0	0	0	0	0	0	0	0	0	0	1	0	0	0	0	0	0	0	0	0	0	0	0	0	0	0
hsa-miR-17-3p#NTA(A)	0	0	0	0	0	0	0	0	0	0	0	0	0	0	0	0	0	0	0	0	0	0	0	0	0	0	10
hsa-miR-17-5p#Canonical_RC	9	0	0	0	0	0	0	0	0	0	0	15	0	0	0	0	16	0	0	0	0	0	28	0	0	0	0
hsa-miR-17-5p#lv3pE	0	0	0	0	0	0	13	0	0	0	0	0	0	0	0	0	0	0	0	0	0	0	0	0	0	0	0
hsa-miR-17-5p#lv3pT	0	0	0	0	0	0	30	0	0	0	0	0	0	0	0	0	0	0	0	0	0	0	0	0	0	0	0
hsa-miR-17-5p#NTA(A)	1	22	0	0	0	0	26	0	0	0	0	0	56	22	0	52	0	48	0	14	0	24	18	0	14	0	0
hsa-miR-17-5p#NTA(U)	0	0	6	0	0	0	0	0	0	0	0	0	0	0	0	0	0	0	0	0	0	0	0	0	0	0	0
hsa-miR-181a-2-3p#Canonical_RC	0	9	0	0	0	0	0	0	0	0	0	0	0	0	0	0	13	0	0	0	0	0	0	0	0	0	0
hsa-miR-181a-2-3p#NTA(A)	0	1	0	0	0	0	0	0	0	0	0	0	0	0	0	0	0	0	0	0	0	0	0	0	0	0	0
hsa-miR-181a-5p#lv3pT	0	0	0	18	0	0	0	0	0	0	0	0	0	0	0	0	0	0	0	0	16	0	20	0	0	0	0
hsa-miR-182-3p#lv3pT	0	0	0	0	0	0	0	0	0	0	0	0	0	0	0	0	0	17	0	0	0	0	0	0	0	0	0
hsa-miR-182-5p#Canonical_RC	124	81	5	40	0	21	218	0	49	18	74	39	79	145	27	21	66	260	84	37	0	22	100	18	0	39	48
hsa-miR-182-5p#lv3pE	82	63	19	56	0	12	46	0	0	79	51	79	0	43	18	3	15	36	118	0	14	0	114	36	0	40	0
hsa-miR-182-5p#lv3pT	35	73	0	50	47	43	10	0	24	47	12	36	69	83	52	0	10	100	98	35	0	24	18	0	0	0	54
hsa-miR-182-5p#mv	0	0	0	0	0	0	1	0	0	0	0	0	0	0	0	0	0	0	0	0	0	0	0	0	0	0	0
hsa-miR-182-5p#NTA(A)	0	0	0	0	0	0	22	0	0	0	0	0	59	58	49	0	7	88	20	19	3	0	48	0	0	0	11
hsa-miR-182-5p#NTA(C)	0	0	0	0	0	0	0	0	0	0	0	0	0	0	0	0	0	1	0	0	0	0	1	0	0	0	0
hsa-miR-182-5p#NTA(G)	0	0	0	0	0	0	0	0	0	0	0	0	0	0	0	0	0	1	0	0	0	0	0	0	0	0	0
hsa-miR-182-5p#NTA(U)	0	0	0	0	0	0	0	0	0	0	0	0	0	0	0	0	0	0	1	0	0	0	0	0	0	0	0
hsa-miR-183-5p#Canonical_RC	57	67	11	42	13	0	109	12	26	43	54	72	111	98	37	31	62	365	395	28	51	33	744	225	69	25	52
hsa-miR-183-5p#lv3pE	42	14	0	0	15	0	13	0	0	0	11	0	14	13	0	0	20	37	39	0	0	0	264	30	0	27	0
hsa-miR-183-5p#lv3pT	0	0	0	0	0	0	0	0	0	0	0	0	0	0	0	0	0	24	0	15	0	0	31	0	0	0	0
hsa-miR-183-5p#lv5pE	0	0	0	0	0	0	0	0	0	0	0	0	0	0	0	0	0	0	11	0	0	0	0	0	0	0	0
hsa-miR-183-5p#lv5pT	0	0	0	0	0	0	15	0	0	0	0	23	0	0	0	22	0	9	24	13	0	0	59	15	0	0	19
hsa-miR-183-5p#mv	0	0	0	0	0	0	0	0	0	0	0	0	0	0	0	0	0	0	0	0	0	0	76	76	9	0	0
hsa-miR-183-5p#NTA(A)	0	0	0	0	0	0	0	0	0	0	0	0	0	0	0	0	0	1	3	0	0	0	18	0	0	0	0
hsa-miR-183-5p#NTA(C)	0	0	0	0	0	0	0	0	0	0	0	0	0	0	0	0	0	1	0	0	0	0	2	0	0	0	0
hsa-miR-184#Canonical_RC	1073	490	173	274	531	197	554	159	512	571	466	447	616	839	237	445	497	813	492	132	229	41	919	168	68	224	86
hsa-miR-184#lv3pE	26	0	0	21	12	0	25	0	19	45	0	16	43	122	25	0	40	185	73	0	0	0	147	28	0	32	11
hsa-miR-184#lv3pT	102	20	11	18	36	13	60	0	102	20	62	24	42	193	37	41	98	86	63	18	0	0	227	26	27	12	40
hsa-miR-184#lv5pT	1	0	0	0	0	0	0	0	0	0	0	0	0	0	0	0	0	0	0	0	0	0	0	0	0	0	0
hsa-miR-184#mv	0	0	0	0	0	0	0	0	0	0	0	0	0	0	5	0	0	0	0	0	0	0	0	0	0	0	0
hsa-miR-184#NTA(A)	11	13	0	0	0	33	20	1	1	16	2	16	213	372	95	67	91	240	163	34	69	1	355	17	0	0	21
hsa-miR-184#NTA(C)	11	16	0	0	0	15	0	0	0	0	0	0	13	15	0	0	0	0	27	0	0	0	21	0	0	0	0
hsa-miR-184#NTA(G)	0	0	0	0	0	0	0	0	0	0	0	0	0	0	0	0	0	0	0	0	0	0	18	19	0	0	0
hsa-miR-184#NTA(U)	52	68	12	16	32	0	42	0	28	17	45	61	34	32	0	1	0	62	59	0	0	0	118	17	1	0	24
hsa-miR-1843#lv3pT	0	0	0	14	0	0	0	0	0	0	0	0	0	0	0	0	0	0	0	0	0	0	0	0	0	0	0
hsa-miR-186-5p#Canonical_RC	0	0	0	2	0	0	0	0	0	0	0	0	18	0	0	0	0	0	0	0	0	0	0	0	0	0	0
hsa-miR-186-5p#NTA(A)	0	0	0	0	0	0	0	0	0	0	0	0	0	0	0	0	0	18	0	0	0	0	0	0	0	0	0
hsa-miR-188-5p#Canonical_RC	0	14	0	0	0	0	0	0	0	0	0	0	0	0	0	0	0	0	0	0	0	0	0	0	0	0	0
hsa-miR-18a-3p#lv3pT	0	0	0	0	0	0	16	0	0	0	0	0	0	0	0	0	0	0	0	0	0	0	0	0	0	0	0
hsa-miR-18a-3p#NTA(A)	0	0	0	0	0	0	0	0	0	0	0	0	0	0	0	0	0	17	0	0	0	0	0	0	0	0	17
hsa-miR-18a-3p#NTA(U)	0	0	0	16	0	0	0	0	0	0	0	0	0	0	0	0	0	0	0	0	0	0	0	0	0	0	0
hsa-miR-18a-5p#Canonical_RC	0	0	0	0	0	0	0	0	18	0	0	0	0	0	0	0	0	0	0	0	0	0	0	0	0	0	0
hsa-miR-191-3p#lv3pT	0	0	0	0	0	0	0	0	0	0	0	0	0	0	0	0	0	0	0	13	0	0	0	0	0	0	0
hsa-miR-191-3p#lv5pT	0	0	0	0	0	0	0	0	0	0	0	0	0	0	0	0	0	0	13	0	0	0	13	0	0	0	0
hsa-miR-191-3p#NTA(A)	0	0	0	0	0	0	0	0	0	0	0	0	0	0	0	0	0	0	0	0	0	0	1	0	0	0	0
hsa-miR-191-3p#NTA(U)	0	0	0	0	0	0	3	0	0	0	0	0	0	0	0	0	0	0	0	0	0	0	0	0	0	0	0
hsa-miR-191-5p#Canonical_RC	64	0	14	41	61	21	93	0	14	47	0	48	2	53	13	22	22	89	85	52	42	16	401	97	0	82	0
hsa-miR-191-5p#lv3pE	0	0	0	0	0	0	0	0	0	0	0	0	7	0	0	0	0	0	0	0	0	0	0	0	0	26	20
hsa-miR-191-5p#lv3pT	14	0	14	0	0	0	27	0	0	23	0	52	0	0	0	16	9	28	0	0	19	22	45	21	0	0	16
hsa-miR-191-5p#lv5pT	13	0	0	61	0	0	47	0	0	14	0	21	0	0	0	0	0	17	0	0	12	0	17	12	0	0	0
hsa-miR-191-5p#mv	0	0	0	0	0	0	18	0	0	0	0	0	0	0	0	0	0	0	0	0	0	0	0	0	0	0	0
hsa-miR-191-5p#NTA(A)	18	0	0	0	0	0	1	0	0	0	0	0	28	24	18	0	0	100	0	0	12	0	17	0	0	0	0
hsa-miR-191-5p#NTA(C)	0	0	0	0	0	0	0	0	0	0	0	0	0	0	0	0	0	0	0	0	0	0	0	1	0	0	0
hsa-miR-191-5p#NTA(G)	0	0	0	1	0	0	0	0	0	0	0	0	0	0	0	0	0	0	16	0	0	0	1	0	0	0	0
hsa-miR-1910-5p#NTA(A)	0	0	0	0	0	0	0	0	0	0	0	0	0	0	0	0	0	0	0	0	0	23	0	0	0	0	0
hsa-miR-1911-5p#lv3pT	0	0	0	0	0	0	0	0	0	0	0	6	0	0	0	0	0	0	0	0	0	0	0	0	0	0	0
hsa-miR-1912-5p#NTA(A)	0	0	0	0	0	0	0	0	0	0	0	0	0	0	0	0	0	0	0	0	0	0	9	0	0	0	0
hsa-miR-1914-3p#mv	0	0	0	0	0	0	0	0	0	0	0	0	0	0	0	0	0	0	0	0	0	0	0	0	0	0	13
hsa-miR-192-5p#Canonical_RC	128	157	15	20	122	15	83	13	31	123	42	0	124	247	34	32	64	142	135	22	54	7	450	0	0	0	0
hsa-miR-192-5p#lv3pE	44	0	9	0	36	0	1	0	30	7	0	23	39	79	0	43	0	23	19	0	0	0	94	0	0	0	0
hsa-miR-192-5p#lv3pT	24	0	0	0	0	0	35	0	0	13	0	0	74	76	0	0	0	156	18	0	0	0	165	0	0	0	0
hsa-miR-192-5p#lv5pT	0	13	21	66	34	11	17	15	9	0	0	18	25	14	0	0	0	30	18	0	0	0	47	0	0	35	11
hsa-miR-192-5p#mv	225	219	67	143	324	238	338	116	378	447	261	125	438	594	138	86	293	315	220	235	192	138	975	0	41	146	146
hsa-miR-192-5p#NTA(A)	15	22	0	1	0	1	20	0	2	66	0	1	224	221	69	80	1	323	76	74	24	42	452	0	24	83	12
hsa-miR-192-5p#NTA(C)	0	0	0	18	0	0	1	0	0	0	0	0	14	0	0	0	0	24	0	0	0	0	1	0	0	0	0
hsa-miR-192-5p#NTA(G)	0	2	0	0	0	0	0	0	0	0	0	0	9	22	0	0	0	19	0	0	0	22	2	0	0	0	0
hsa-miR-192-5p#NTA(U)	112	125	79	111	137	113	218	0	190	308	100	175	142	140	9	22	56	89	69	24	17	21	76	0	0	11	46
hsa-miR-193a-5p#lv3pT	0	0	0	0	0	0	0	0	0	0	17	0	7	0	0	0	0	0	0	0	0	0	7	0	0	0	0
hsa-miR-193a-5p#NTA(A)	0	0	0	0	0	0	0	0	0	0	0	0	0	0	0	0	7	0	0	0	0	0	0	23	0	0	0
hsa-miR-194-3p#lv3pT	0	0	0	0	0	0	0	0	0	0	0	0	0	0	0	0	0	0	0	0	0	0	0	0	0	0	11
hsa-miR-194-5p#Canonical_RC	0	16	0	0	0	18	0	0	0	0	17	0	0	16	0	15	0	15	0	0	0	0	0	0	0	0	0
hsa-miR-194-5p#lv3pT	0	0	0	0	0	0	0	0	0	0	0	0	0	0	0	0	0	0	0	0	0	0	11	0	0	0	0
hsa-miR-195-3p#Canonical_RC	24	48	11	0	0	0	80	0	20	0	0	0	14	0	0	0	0	24	0	0	0	0	0	0	0	0	0
hsa-miR-195-3p#lv3pE	0	0	0	0	0	0	23	0	0	19	0	0	0	0	0	0	0	0	18	0	0	0	43	0	0	0	0
hsa-miR-195-3p#lv3pT	11	0	0	0	0	0	0	0	0	0	0	0	31	0	0	0	0	0	0	0	0	0	0	0	0	0	0
hsa-miR-195-3p#lv5pT	0	0	0	0	0	0	0	0	0	0	0	0	0	0	0	0	0	0	0	12	0	0	0	0	0	0	0
hsa-miR-195-3p#NTA(A)	0	0	0	0	0	0	21	0	21	0	0	0	0	19	0	0	0	24	0	0	0	0	35	0	0	0	0
hsa-miR-195-3p#NTA(U)	0	0	0	0	0	0	0	0	0	0	0	0	16	0	0	0	0	0	0	0	0	0	0	0	0	0	0
hsa-miR-195-5p#Canonical_RC	0	39	0	37	0	0	24	0	0	38	0	0	0	0	48	0	0	0	0	0	28	0	0	0	0	19	0
hsa-miR-195-5p#lv3pT	0	0	0	0	0	0	0	0	0	14	0	0	0	0	0	0	0	0	0	0	0	0	22	0	0	18	0
hsa-miR-195-5p#NTA(A)	12	0	0	0	0	0	0	0	0	24	0	0	0	0	13	0	0	20	0	0	0	0	0	0	0	0	0
hsa-miR-196a-5p#Canonical_RC	0	0	0	0	0	0	0	0	0	0	0	0	0	0	16	0	0	21	56	0	6	25	34	0	0	0	0
hsa-miR-196a-5p#lv3pE	0	0	0	0	0	0	0	0	0	0	0	0	0	0	0	0	0	28	0	0	0	0	0	0	0	0	0
hsa-miR-196a-5p#lv3pT	0	0	0	0	0	0	0	0	0	0	0	0	0	17	0	0	0	0	0	0	0	0	41	0	0	0	0
hsa-miR-196a-5p#NTA(C)	0	0	0	0	0	0	0	0	0	0	0	0	0	0	0	0	0	0	0	0	1	0	0	0	0	0	0
hsa-miR-19a-3p#NTA(U)	0	0	0	0	0	0	0	0	0	0	17	0	0	0	0	0	0	0	0	0	0	0	0	0	0	13	27
hsa-miR-19b-3p#lv3pT	0	0	0	0	0	0	0	0	0	0	0	0	14	0	25	0	0	0	0	0	0	0	0	0	0	0	0
hsa-miR-19b-3p#NTA(A)	0	0	0	0	0	0	0	0	0	0	0	0	0	0	0	0	14	0	0	0	0	0	0	0	0	0	0
hsa-miR-19b-3p#NTA(G)	0	0	0	0	0	0	0	0	0	0	0	0	0	0	0	0	0	0	0	0	11	0	0	0	0	0	0
hsa-miR-19b-3p#NTA(U)	7	0	0	0	0	0	0	17	0	0	11	19	0	0	0	0	0	0	0	0	0	0	0	0	0	0	0
hsa-miR-200b-3p#lv3pE	0	0	0	0	0	0	0	0	0	0	0	0	0	0	0	0	0	0	17	0	0	20	0	0	0	0	0
hsa-miR-200b-3p#NTA(A)	0	0	0	0	0	0	0	0	0	0	0	0	10	35	0	0	0	0	0	0	0	0	37	0	0	0	0
hsa-miR-200b-3p#NTA(C)	0	0	0	0	0	0	0	0	0	0	0	0	0	0	0	0	0	0	0	0	0	0	0	0	20	0	0
hsa-miR-200c-3p#Canonical_RC	0	0	0	16	0	0	0	0	0	0	0	0	0	0	0	0	0	0	0	0	0	0	0	0	0	0	0
hsa-miR-200c-3p#lv3pT	0	0	0	0	0	0	0	0	0	0	0	0	0	0	0	0	0	0	0	15	0	0	0	0	0	0	0
hsa-miR-200c-3p#NTA(A)	0	0	0	0	0	0	0	0	0	0	0	0	0	0	0	0	0	0	0	0	0	0	20	0	0	0	0
hsa-miR-202-3p#Canonical_RC	0	0	0	0	0	0	13	0	0	0	0	0	0	0	0	0	0	0	0	0	0	0	0	0	0	0	0
hsa-miR-202-3p#lv3pT	7	0	0	0	0	0	0	0	0	0	0	0	0	0	0	0	0	0	11	0	0	0	42	0	0	0	0
hsa-miR-202-3p#mv	16	0	0	0	0	0	0	0	0	0	0	0	0	0	0	0	8	0	0	0	0	0	7	0	0	0	0
hsa-miR-202-5p#lv3pT	18	19	15	0	0	4	0	21	0	0	0	0	0	0	0	13	0	0	12	0	0	0	0	0	0	0	0
hsa-miR-202-5p#NTA(A)	0	0	0	0	0	0	0	0	0	0	0	0	0	0	0	0	0	0	0	0	0	0	2	0	0	0	0
hsa-miR-202-5p#NTA(U)	0	27	0	0	0	0	0	0	0	0	0	0	0	0	0	0	0	0	0	0	0	0	0	0	0	0	0
hsa-miR-203a-3p#lv3pT	0	0	0	0	0	0	19	0	0	0	0	0	11	0	0	0	0	7	0	0	0	0	0	0	0	0	0
hsa-miR-203a-3p#lv5pT	0	0	0	0	0	0	0	0	0	0	0	0	0	0	0	0	0	0	0	0	0	0	28	0	0	0	0
hsa-miR-203a-3p#mv	26	0	0	0	17	0	0	0	0	1	0	0	2	0	0	10	0	12	0	0	16	0	0	0	0	0	0
hsa-miR-203a-3p#NTA(C)	11	0	0	0	0	0	0	0	0	0	0	0	0	0	0	0	0	0	0	0	0	0	0	0	0	0	0
hsa-miR-203a-3p#NTA(U)	0	0	0	0	0	0	0	0	0	12	0	0	0	14	0	0	0	0	0	0	0	0	0	0	0	0	0
hsa-miR-204-5p#Canonical_RC	8	0	0	15	0	0	27	0	14	39	9	0	15	0	0	0	0	0	17	0	0	0	0	0	0	0	0
hsa-miR-204-5p#lv3pE	0	9	28	34	26	9	111	15	20	45	19	81	33	35	13	20	28	64	30	0	14	0	24	15	15	0	28
hsa-miR-204-5p#lv3pT	14	0	0	0	0	0	29	0	0	0	0	0	0	0	0	0	0	0	0	0	0	0	0	0	0	0	0
hsa-miR-204-5p#NTA(A)	0	0	0	0	0	0	0	0	0	0	0	0	68	71	39	10	36	59	43	17	11	55	57	0	0	0	0
hsa-miR-204-5p#NTA(C)	0	0	0	0	0	0	0	0	0	28	0	0	12	0	0	0	0	0	0	0	0	0	0	0	0	0	0
hsa-miR-204-5p#NTA(G)	0	0	0	0	0	0	0	0	0	0	0	0	0	0	0	0	0	0	0	0	0	0	12	0	0	0	0
hsa-miR-204-5p#NTA(U)	12	0	0	0	24	20	32	16	20	24	0	14	7	0	0	0	0	14	15	0	0	0	20	0	1	0	0
hsa-miR-205-5p#Canonical_RC	0	0	0	0	0	0	0	0	0	0	0	0	9	0	0	0	0	0	0	0	0	0	0	0	0	0	0
hsa-miR-206#lv3pT	0	0	0	0	0	0	0	0	0	0	0	0	15	0	0	0	0	0	0	0	0	0	0	0	0	0	0
hsa-miR-20a-5p#Canonical_RC	68	60	1	77	104	50	128	34	100	185	74	133	37	16	59	15	36	76	0	24	7	0	57	79	0	38	90
hsa-miR-20a-5p#lv3pE	17	0	0	0	8	0	0	0	0	0	0	0	0	0	0	0	0	0	0	0	0	0	0	0	0	0	0
hsa-miR-20a-5p#lv3pT	0	0	0	17	0	0	19	0	0	0	0	0	0	0	0	0	0	0	0	0	0	0	0	0	0	0	0
hsa-miR-20a-5p#lv5pT	0	0	0	0	0	0	0	0	0	0	0	0	0	0	0	0	0	0	0	1	0	0	0	0	0	0	0
hsa-miR-20a-5p#NTA(A)	0	31	0	16	23	23	30	9	22	0	17	35	64	100	66	57	121	152	19	91	13	24	208	29	0	89	46
hsa-miR-20a-5p#NTA(U)	0	0	0	0	0	0	0	0	0	0	0	0	0	0	0	0	0	0	0	0	0	0	1	0	0	0	0
hsa-miR-21-5p#Canonical_RC	36	40	0	0	0	0	26	0	13	0	0	0	16	0	41	0	16	80	0	24	0	0	52	0	0	0	9
hsa-miR-21-5p#lv3pE	2123	3066	123	133	269	356	186	92	110	179	4	108	395	694	13	57	219	2862	1950	255	100	30	2653	1517	74	61	118
hsa-miR-21-5p#lv3pT	16	62	12	0	0	0	0	15	0	0	0	0	0	19	0	0	0	38	0	7	0	0	0	14	0	0	10
hsa-miR-21-5p#mv	14	0	0	0	0	0	0	0	12	0	0	0	0	0	0	0	0	0	17	0	0	0	0	0	0	0	0
hsa-miR-21-5p#NTA(A)	85	135	13	0	0	68	1	12	0	31	23	22	11	75	18	0	20	167	48	17	8	0	256	147	0	19	20
hsa-miR-21-5p#NTA(C)	63	56	0	0	0	0	0	0	0	0	0	20	10	1	0	0	0	26	25	0	0	0	24	41	0	20	0
hsa-miR-21-5p#NTA(G)	13	9	0	0	0	0	0	0	0	0	0	0	0	2	0	0	1	7	4	1	0	0	35	2	0	1	0
hsa-miR-21-5p#NTA(U)	1	0	0	0	0	0	0	0	0	0	0	0	0	0	0	0	0	1	1	0	0	0	2	1	0	0	0
hsa-miR-210-3p#Canonical_RC	0	0	0	0	0	0	0	0	0	0	0	0	0	0	0	0	0	0	0	0	0	0	0	5	0	0	0
hsa-miR-2113#Canonical_RC	0	0	0	0	0	0	0	0	0	0	0	0	0	0	0	0	0	0	20	0	0	0	0	0	0	0	0
hsa-miR-2113#lv3pE	0	0	0	0	0	0	0	0	0	0	0	0	0	0	0	0	0	0	0	0	0	0	22	0	0	0	0
hsa-miR-2113#lv3pT	0	0	0	0	0	0	0	0	0	0	0	0	0	0	0	0	0	0	16	0	0	17	0	0	0	0	0
hsa-miR-2113#NTA(A)	0	0	0	0	0	0	0	0	0	0	0	0	0	0	0	0	0	22	0	0	0	0	29	0	0	0	0
hsa-miR-2113#NTA(C)	0	0	0	0	0	0	0	0	0	0	0	0	0	0	0	0	0	0	1	0	0	0	0	0	0	0	0
hsa-miR-2115-3p#lv3pE	0	0	0	0	0	0	0	0	0	0	0	0	0	0	0	0	0	23	0	0	0	0	0	0	0	0	0
hsa-miR-212-5p#Canonical_RC	9	0	0	0	0	0	0	0	0	0	0	0	0	0	18	0	0	0	7	0	0	0	33	0	0	0	0
hsa-miR-212-5p#lv3pT	12	0	0	0	0	0	0	0	0	0	0	0	0	0	0	0	0	0	0	0	0	0	12	0	0	0	0
hsa-miR-215-5p#lv3pE	0	0	0	0	0	0	0	0	0	0	0	0	0	0	0	0	0	0	0	0	0	0	0	0	0	0	14
hsa-miR-215-5p#mv	0	0	0	1	1	0	1	0	1	0	1	0	10	1	0	0	0	0	0	0	1	0	2	1	0	0	0
hsa-miR-215-5p#NTA(A)	0	0	0	0	0	0	0	0	0	0	0	0	1	1	0	0	0	1	0	0	0	0	2	0	0	0	0
hsa-miR-215-5p#NTA(G)	1	0	0	0	0	0	0	0	0	2	0	1	1	1	0	0	0	0	0	0	0	0	3	1	0	0	0
hsa-miR-215-5p#NTA(U)	0	0	0	0	0	0	0	0	0	0	0	0	0	0	0	0	0	1	0	0	0	0	0	1	0	0	0
hsa-miR-218-5p#Canonical_RC	0	0	0	9	36	16	69	0	79	121	32	24	31	30	0	11	88	22	0	13	0	27	42	17	15	6	40
hsa-miR-218-5p#lv3pE	17	47	12	31	44	46	39	27	58	162	16	29	58	41	58	69	31	38	17	37	43	13	50	0	17	0	20
hsa-miR-218-5p#lv3pT	0	0	0	0	0	0	0	0	0	0	29	0	12	10	0	0	4	0	0	12	0	0	0	0	0	0	0
hsa-miR-218-5p#mv	0	0	0	0	18	0	11	0	13	0	0	0	0	0	0	0	0	0	0	0	0	0	0	0	0	0	0
hsa-miR-218-5p#NTA(A)	0	0	0	0	10	0	75	9	12	70	0	18	55	82	47	74	92	205	76	97	57	18	163	22	19	36	17
hsa-miR-218-5p#NTA(C)	0	0	0	0	0	0	0	0	0	0	0	0	0	0	0	0	0	0	1	0	0	0	0	0	0	0	0
hsa-miR-218-5p#NTA(G)	0	0	0	0	0	0	0	0	0	0	0	0	0	0	0	0	0	0	0	0	0	0	1	0	1	0	0
hsa-miR-218-5p#NTA(U)	0	0	0	0	0	0	15	0	0	0	0	0	0	0	0	0	0	0	0	0	0	0	0	0	0	0	0
hsa-miR-219a-1-3p#Canonical_RC	0	0	0	0	0	0	0	0	0	0	0	0	0	0	0	0	0	0	0	15	0	0	0	0	0	0	0
hsa-miR-219a-2-3p#lv3pT	0	0	0	0	0	0	0	0	0	0	0	0	0	0	0	0	0	26	0	0	0	0	0	0	0	0	0
hsa-miR-219b-3p#mv	0	0	0	0	0	0	0	0	0	0	0	0	0	1	0	0	0	0	0	0	0	0	0	0	0	0	0
hsa-miR-22-3p#Canonical_RC	342	201	0	75	97	34	235	55	112	133	69	16	375	247	0	33	143	568	270	16	29	65	661	259	0	91	56
hsa-miR-22-3p#lv3pE	9	8	0	20	0	0	0	0	0	0	0	0	8	0	0	0	0	21	0	0	0	0	0	0	0	0	0
hsa-miR-22-3p#lv3pT	152	194	0	20	34	9	59	11	48	42	45	84	168	126	42	51	59	379	364	22	27	30	313	196	0	38	32
hsa-miR-22-3p#mv	0	0	0	0	0	0	0	0	0	0	0	0	0	0	0	0	0	0	0	0	25	0	0	0	0	0	0
hsa-miR-22-3p#NTA(A)	17	0	0	1	14	0	0	0	0	10	1	0	34	89	162	17	30	180	68	0	0	15	99	69	0	34	34
hsa-miR-22-3p#NTA(C)	0	0	0	14	0	0	20	0	0	0	0	0	8	0	32	23	17	1	0	0	0	0	0	0	0	0	0
hsa-miR-22-3p#NTA(G)	0	0	0	0	0	0	0	0	0	0	0	0	0	0	0	0	0	0	0	7	0	0	0	0	0	0	0
hsa-miR-22-3p#NTA(U)	0	0	0	0	0	0	0	0	0	0	0	0	11	0	0	0	0	1	0	0	0	0	15	0	0	0	0
hsa-miR-22-5p#lv3pT	11	0	0	42	30	24	39	0	46	29	33	37	0	15	15	0	17	0	7	0	0	0	0	0	0	0	25
hsa-miR-22-5p#NTA(A)	0	0	0	0	0	0	0	0	0	0	0	0	0	0	0	0	0	22	0	0	0	0	0	0	0	0	0
hsa-miR-22-5p#NTA(C)	0	0	0	0	0	1	0	0	0	0	0	0	0	0	0	0	0	0	0	0	0	0	0	0	0	0	0
hsa-miR-224-5p#lv5pT	0	0	0	0	0	0	0	0	0	0	0	0	0	0	0	0	0	22	0	0	24	0	24	0	0	0	0
hsa-miR-224-5p#NTA(A)	0	0	0	0	0	0	0	0	0	0	0	0	0	0	0	0	0	0	0	0	0	0	0	0	0	0	18
hsa-miR-2276-3p#lv3pT	0	0	0	0	0	0	0	0	0	0	0	0	0	0	0	0	0	0	0	0	0	0	10	0	0	0	0
hsa-miR-2276-3p#lv5pT	0	0	0	0	0	0	0	0	0	0	0	0	0	0	0	0	0	0	0	0	0	0	3	0	0	0	0
hsa-miR-2276-3p#mv	0	0	0	0	0	0	0	0	0	0	0	0	0	0	0	0	0	0	0	0	11	0	0	0	0	0	0
hsa-miR-2392#NTA(C)	0	0	0	0	0	0	0	0	0	0	0	0	0	0	0	0	0	0	0	0	0	0	1	0	0	0	0
hsa-miR-2392#NTA(G)	0	0	0	0	0	0	0	0	0	0	0	0	0	0	0	0	0	1	0	0	0	0	0	0	0	0	0
hsa-miR-24-3p#Canonical_RC	0	12	0	0	17	0	0	0	0	0	14	0	0	12	0	0	0	0	0	0	0	0	0	0	0	0	0
hsa-miR-24-3p#lv3pT	0	28	0	0	15	16	0	0	7	15	7	7	0	0	0	0	0	28	0	0	0	0	0	0	0	0	0
hsa-miR-24-3p#NTA(A)	0	0	0	0	0	0	0	0	0	0	0	0	0	0	0	0	0	0	0	6	0	0	0	0	0	15	0
hsa-miR-24-3p#NTA(G)	0	1	0	0	0	0	0	0	0	0	0	0	0	0	0	0	0	0	0	0	0	0	0	0	0	0	0
hsa-miR-24-3p#NTA(U)	0	0	0	11	0	0	0	0	0	0	0	0	0	0	0	0	0	0	0	0	0	0	0	0	0	0	0
hsa-miR-25-3p#Canonical_RC	29	0	13	18	39	0	8	0	30	84	15	38	40	0	53	14	0	0	0	10	0	0	31	34	46	0	32
hsa-miR-25-3p#lv3pE	0	0	0	0	0	0	0	0	0	0	0	0	0	0	0	0	0	0	0	0	15	0	0	0	0	0	0
hsa-miR-25-3p#lv3pT	0	0	0	24	2	0	41	34	40	32	112	36	13	0	26	12	0	19	0	27	7	0	66	17	59	0	56
hsa-miR-25-3p#NTA(A)	0	0	0	0	0	0	0	0	18	61	23	22	127	235	335	194	305	250	140	102	159	53	321	75	80	97	153
hsa-miR-25-3p#NTA(C)	0	0	0	0	0	0	0	0	0	0	0	0	0	0	0	17	0	0	0	0	0	0	0	0	0	0	0
hsa-miR-25-3p#NTA(G)	0	0	0	0	0	0	0	0	0	0	0	23	0	0	0	0	15	1	0	0	0	0	0	0	0	0	0
hsa-miR-25-3p#NTA(U)	0	20	0	0	0	0	0	0	0	0	0	0	21	0	0	21	0	0	17	0	20	0	12	0	0	0	0
hsa-miR-25-5p#lv3pE	0	0	0	0	0	0	0	0	0	0	0	0	0	0	0	0	0	0	0	0	0	0	50	32	0	0	0
hsa-miR-26a-5p#Canonical_RC	267	420	177	363	868	293	554	169	485	759	335	119	30	127	140	55	67	263	111	69	73	47	521	164	99	217	128
hsa-miR-26a-5p#lv3pE	0	0	0	0	0	0	0	0	0	0	0	0	15	0	0	0	0	0	0	0	0	0	0	0	0	0	0
hsa-miR-26a-5p#lv3pT	0	0	0	12	0	15	15	0	25	0	0	0	0	19	16	1	0	12	0	0	0	0	18	0	0	16	0
hsa-miR-26a-5p#lv5pT	0	0	0	1	0	0	0	13	0	0	0	0	0	0	0	0	0	0	0	0	0	0	0	0	0	0	0
hsa-miR-26a-5p#mv	0	0	0	0	0	0	0	0	0	0	0	0	0	0	0	0	0	0	0	0	0	0	17	0	0	0	0
hsa-miR-26a-5p#NTA(A)	0	0	0	0	1	12	23	1	0	19	1	0	0	42	23	18	11	0	0	16	11	23	53	0	0	0	15
hsa-miR-26a-5p#NTA(G)	0	0	0	0	0	0	0	0	0	1	0	0	0	0	0	0	0	0	17	0	0	0	0	0	0	0	0
hsa-miR-26a-5p#NTA(U)	0	14	0	0	0	0	0	0	0	21	0	0	0	0	0	0	16	0	0	0	0	0	1	0	0	0	0
hsa-miR-26b-5p#Canonical_RC	0	11	11	0	0	0	41	0	0	0	14	0	0	18	0	0	0	34	0	0	0	0	8	0	0	0	0
hsa-miR-26b-5p#lv3pE	0	0	1	0	28	0	21	0	0	0	0	0	0	0	0	0	0	0	0	0	0	0	31	0	0	0	0
hsa-miR-26b-5p#lv3pT	0	0	0	0	0	0	0	0	0	0	0	0	0	0	0	0	0	0	0	0	0	0	0	0	0	1	0
hsa-miR-26b-5p#NTA(A)	17	0	0	0	0	0	1	0	0	0	0	0	0	0	0	0	0	0	0	0	0	0	0	0	0	0	0
hsa-miR-26b-5p#NTA(U)	0	1	0	0	0	0	0	0	0	0	0	0	0	0	0	0	0	0	0	0	0	0	0	0	0	0	0
hsa-miR-27a-3p#lv3pT	0	0	0	0	0	0	0	0	0	0	0	0	0	0	0	0	0	0	0	0	0	0	18	0	0	1	0
hsa-miR-27a-3p#NTA(A)	0	0	0	0	0	0	0	0	0	0	0	0	0	0	0	0	0	0	0	0	0	0	23	0	0	0	0
hsa-miR-27a-5p#lv3pE	0	0	0	0	0	0	0	0	0	0	0	0	0	0	0	0	0	0	14	0	0	0	0	0	0	0	0
hsa-miR-27b-3p#Canonical_RC	0	0	0	0	0	0	21	0	10	0	0	0	0	18	18	0	13	0	0	0	0	0	0	29	0	0	0
hsa-miR-27b-3p#lv3pE	0	0	0	9	29	0	0	0	0	19	0	0	22	0	14	0	21	0	0	0	0	0	17	15	0	0	0
hsa-miR-27b-3p#lv3pT	74	94	12	5	12	12	56	0	21	0	19	67	16	24	0	19	38	75	73	13	6	0	38	18	0	12	14
hsa-miR-27b-3p#lv5pE	0	0	0	0	0	0	0	0	0	0	0	0	0	0	0	0	0	21	0	0	0	0	0	0	0	0	0
hsa-miR-27b-3p#mv	0	0	0	0	0	0	0	0	0	0	0	0	16	0	17	0	0	0	0	0	0	0	0	0	0	0	0
hsa-miR-27b-3p#NTA(A)	0	0	0	0	0	0	0	0	0	0	0	0	14	13	21	31	18	98	21	0	8	0	69	1	0	0	13
hsa-miR-27b-3p#NTA(G)	0	0	0	0	0	0	0	0	0	0	0	0	0	0	14	0	0	0	1	0	0	0	0	0	0	0	0
hsa-miR-27b-3p#NTA(U)	43	0	14	22	11	0	45	0	30	0	35	52	72	70	14	61	35	80	27	0	0	0	0	13	0	22	48
hsa-miR-28-3p#Canonical_RC	99	0	23	21	0	0	24	0	35	16	0	56	25	14	0	0	0	36	0	0	0	0	7	0	0	0	0
hsa-miR-28-3p#lv3pT	0	0	0	34	0	0	0	0	0	19	0	0	23	0	0	0	0	13	0	0	0	0	0	0	0	0	0
hsa-miR-28-3p#NTA(A)	0	0	0	0	0	0	0	0	0	0	24	0	42	53	19	0	13	16	0	0	17	0	72	0	0	0	21
hsa-miR-28-3p#NTA(C)	0	0	0	0	0	0	0	0	0	0	0	0	0	0	0	0	0	15	0	0	0	0	0	0	0	0	0
hsa-miR-28-3p#NTA(U)	0	0	0	19	0	0	0	0	0	0	0	0	10	0	0	0	0	0	0	0	1	0	0	18	0	0	0
hsa-miR-28-5p#Canonical_RC	0	0	0	0	32	0	0	0	0	0	0	0	16	0	0	0	0	0	0	0	0	0	0	0	0	0	0
hsa-miR-28-5p#lv3pT	0	0	0	0	0	0	19	0	0	0	0	0	0	0	0	13	22	0	0	0	0	0	42	0	0	0	0
hsa-miR-28-5p#NTA(A)	0	0	0	0	0	0	0	0	0	0	0	0	0	0	0	21	0	26	28	0	0	16	19	17	0	0	0
hsa-miR-28-5p#NTA(G)	0	0	0	0	0	0	0	0	0	0	0	0	5	0	0	0	0	0	0	0	0	0	0	0	0	0	0
hsa-miR-28-5p#NTA(U)	0	0	0	0	0	0	0	0	0	0	0	0	9	0	0	0	0	0	0	0	0	0	0	0	0	0	0
hsa-miR-29a-3p#Canonical_RC	0	0	0	17	0	0	0	0	0	0	0	16	0	0	0	0	0	0	0	0	0	0	0	0	0	0	0
hsa-miR-29a-3p#lv3pT	0	16	0	17	0	0	0	0	39	20	24	0	32	0	17	0	0	12	0	0	0	0	0	0	0	0	0
hsa-miR-29a-3p#mv	0	0	0	18	0	21	20	0	0	0	0	20	0	0	18	0	17	0	0	0	0	0	0	0	0	0	5
hsa-miR-29a-3p#NTA(A)	0	0	0	0	0	0	0	0	0	0	0	0	0	0	0	0	0	0	6	0	0	0	0	0	0	0	0
hsa-miR-29a-3p#NTA(U)	0	0	0	0	0	0	33	0	0	0	0	0	0	0	0	0	0	0	0	0	0	0	0	0	0	0	0
hsa-miR-29b-3p#Canonical_RC	0	0	0	0	0	0	0	0	0	0	0	11	0	0	0	0	0	0	0	0	0	0	0	0	0	0	0
hsa-miR-29b-3p#lv3pT	0	0	8	0	0	0	0	0	0	0	0	0	0	0	0	0	0	0	0	0	0	0	0	0	0	0	0
hsa-miR-29b-3p#mv	0	0	0	0	0	0	0	0	0	0	0	0	0	0	0	0	0	0	6	0	0	0	0	0	0	19	0
hsa-miR-29b-3p#NTA(A)	0	0	1	0	0	0	0	0	0	0	0	0	0	0	0	0	0	0	0	0	0	0	0	0	0	0	0
hsa-miR-29b-3p#NTA(C)	0	0	12	0	0	0	0	0	0	0	16	0	0	0	0	0	14	0	0	0	0	0	0	0	0	0	0
hsa-miR-301a-5p#Canonical_RC	0	0	0	0	0	0	0	0	0	0	0	0	0	0	0	0	0	0	0	0	0	0	28	0	0	0	0
hsa-miR-301a-5p#mv	0	0	0	0	0	0	0	0	0	0	0	0	0	0	0	0	0	11	0	0	0	0	0	0	0	0	0
hsa-miR-302a-5p#lv5pT	0	0	1	0	0	0	0	0	0	0	0	0	0	0	0	0	0	0	0	0	0	0	0	0	0	0	0
hsa-miR-302b-3p#Canonical_RC	0	0	1	0	0	0	0	0	0	0	0	0	0	0	0	0	0	0	0	0	0	0	0	0	0	0	0
hsa-miR-302b-3p#NTA(A)	0	0	0	0	0	0	0	0	0	0	0	0	0	0	1	0	0	0	0	0	0	0	0	0	0	0	0
hsa-miR-3059-5p#lv3pT	0	0	0	0	0	0	0	20	0	0	0	0	0	0	0	0	0	0	0	0	0	0	0	0	0	0	0
hsa-miR-3064-5p#mv	0	0	0	0	0	0	0	0	0	0	0	0	0	0	0	0	0	0	0	0	0	0	15	0	0	0	0
hsa-miR-30a-3p#Canonical_RC	0	0	0	0	0	0	0	0	0	0	0	0	0	0	0	0	0	0	0	0	0	0	17	17	0	0	0
hsa-miR-30a-3p#lv3pT	0	0	0	0	0	0	0	0	0	0	0	0	0	0	0	0	0	0	0	0	7	0	0	0	0	0	0
hsa-miR-30a-3p#lv5pT	0	0	0	0	0	0	0	0	16	28	0	0	0	0	0	0	0	0	0	0	0	0	0	0	0	0	0
hsa-miR-30a-3p#NTA(U)	0	0	0	0	0	0	0	0	0	0	0	0	0	0	0	0	19	0	0	0	0	0	0	0	0	0	0
hsa-miR-30a-5p#Canonical_RC	0	0	0	0	0	0	0	0	0	0	0	0	9	26	0	0	0	27	0	0	0	0	21	0	0	0	0
hsa-miR-30a-5p#lv3pE	67	41	0	9	0	26	1	0	1	2	1	0	27	85	63	0	0	53	46	0	0	0	251	35	0	0	19
hsa-miR-30a-5p#lv3pT	21	17	0	0	0	0	6	0	0	1	0	0	0	20	14	12	12	66	0	0	0	29	1	23	0	0	40
hsa-miR-30a-5p#NTA(A)	1	1	0	0	0	0	0	0	0	0	0	0	9	2	0	0	10	7	41	2	0	0	21	0	1	0	0
hsa-miR-30a-5p#NTA(C)	0	0	0	0	0	0	0	0	0	0	0	0	1	0	0	0	0	0	0	0	0	0	0	0	0	0	0
hsa-miR-30a-5p#NTA(G)	1	0	0	0	0	0	0	0	0	0	0	0	0	1	0	0	0	0	0	0	0	0	0	0	0	0	0
hsa-miR-30b-5p#NTA(C)	0	0	0	0	0	0	0	0	0	0	0	0	0	0	0	0	0	0	0	0	0	0	18	0	0	0	0
hsa-miR-30c-5p#Canonical_RC	24	37	20	28	18	0	51	0	68	21	0	13	24	0	0	7	0	27	0	17	0	0	19	0	21	0	35
hsa-miR-30c-5p#lv3pE	0	0	10	0	0	0	0	0	0	0	29	0	0	0	0	0	0	0	0	0	0	0	0	0	0	0	0
hsa-miR-30c-5p#lv3pT	0	0	0	0	0	39	0	0	0	20	0	0	0	0	0	0	0	26	0	0	0	0	0	0	0	0	0
hsa-miR-30c-5p#NTA(A)	9	0	0	0	0	0	0	0	0	0	0	0	18	0	23	0	20	0	0	0	0	0	0	0	0	0	0
hsa-miR-30c-5p#NTA(C)	0	0	0	0	0	0	0	0	0	0	0	0	0	0	0	0	0	0	0	0	0	19	0	0	0	0	0
hsa-miR-30c-5p#NTA(G)	0	0	0	0	0	0	0	0	0	1	0	0	0	0	0	0	0	0	0	0	0	0	0	0	0	0	0
hsa-miR-30d-3p#mv	2	0	0	0	0	0	0	0	0	0	0	0	0	0	0	0	0	0	0	0	0	0	0	0	0	0	0
hsa-miR-30d-5p#Canonical_RC	31	34	11	0	0	0	16	0	0	0	0	0	0	65	31	0	3	170	0	18	0	0	28	18	0	0	26
hsa-miR-30d-5p#lv3pE	641	694	91	308	156	122	722	27	304	348	238	338	338	496	253	162	305	1362	555	75	87	19	1040	369	0	114	111
hsa-miR-30d-5p#lv3pT	0	0	22	28	64	0	41	0	52	18	9	0	0	42	69	23	89	57	17	32	12	22	48	0	0	58	34
hsa-miR-30d-5p#NTA(A)	2	31	13	1	45	0	1	0	0	1	22	0	70	47	95	5	51	75	0	59	28	0	28	0	0	29	0
hsa-miR-30d-5p#NTA(C)	0	1	0	0	0	0	0	0	0	0	0	0	10	20	0	0	0	0	0	0	0	0	0	0	0	0	0
hsa-miR-30d-5p#NTA(G)	0	0	0	0	0	0	0	0	0	0	0	0	0	0	0	0	0	9	0	0	0	0	3	1	0	0	0
hsa-miR-30d-5p#NTA(U)	10	0	0	0	0	0	0	0	0	0	0	0	0	1	0	0	0	25	0	0	0	0	0	0	0	0	0
hsa-miR-30e-3p#Canonical_RC	137	118	12	0	0	0	56	0	49	0	38	37	133	114	37	20	15	40	51	0	0	0	96	38	0	0	17
hsa-miR-30e-3p#lv3pE	0	0	0	0	0	0	0	0	0	0	0	0	0	0	0	0	13	0	0	0	0	0	0	0	0	0	0
hsa-miR-30e-3p#lv3pT	13	0	19	98	0	7	0	0	15	49	30	0	23	39	39	28	14	0	17	0	0	0	19	0	10	2	0
hsa-miR-30e-3p#NTA(A)	1	21	0	0	0	0	0	0	0	0	0	0	28	0	16	14	20	0	1	0	0	26	85	0	0	0	0
hsa-miR-30e-3p#NTA(C)	0	0	0	0	0	0	0	0	0	0	0	0	0	0	0	0	0	0	0	0	0	0	1	0	0	0	0
hsa-miR-30e-3p#NTA(U)	0	0	0	0	0	0	0	16	0	19	46	0	16	0	23	39	0	13	16	0	0	0	0	0	0	0	31
hsa-miR-30e-5p#Canonical_RC	0	0	0	0	0	0	0	0	0	0	0	0	12	0	0	0	0	0	0	0	0	0	0	0	0	0	0
hsa-miR-30e-5p#lv3pE	178	268	8	53	91	49	176	41	82	77	73	136	130	324	15	17	41	333	52	0	0	34	249	103	15	29	36
hsa-miR-30e-5p#lv3pT	13	0	0	20	0	0	0	0	0	0	0	0	0	2	0	0	20	0	0	0	14	16	18	0	0	0	0
hsa-miR-30e-5p#mv	0	0	0	0	0	0	21	0	0	0	16	0	0	12	0	0	0	0	0	0	0	0	21	0	0	0	0
hsa-miR-30e-5p#NTA(A)	0	0	0	0	1	0	0	0	19	0	0	0	18	0	0	0	0	0	0	0	0	0	1	0	0	1	0
hsa-miR-30e-5p#NTA(C)	0	0	0	0	0	0	0	0	0	0	0	0	22	0	0	0	0	0	0	0	0	0	0	0	0	0	0
hsa-miR-30e-5p#NTA(G)	0	0	0	0	0	0	0	0	0	0	0	0	0	0	0	0	0	0	0	0	0	0	1	0	0	0	0
hsa-miR-30e-5p#NTA(U)	0	17	0	0	0	0	0	0	0	0	0	0	0	0	0	0	0	0	0	0	0	0	35	0	0	0	0
hsa-miR-31-5p#Canonical_RC	0	0	0	0	0	0	0	0	0	0	0	14	0	0	0	0	0	0	0	0	0	0	0	0	0	0	0
hsa-miR-31-5p#lv3pE	0	19	0	0	0	0	14	0	0	0	0	0	19	0	0	0	0	0	0	0	0	0	0	0	0	0	0
hsa-miR-31-5p#lv3pT	0	0	0	11	0	0	26	0	0	0	0	19	0	0	0	37	0	0	0	0	0	0	0	0	0	0	0
hsa-miR-31-5p#NTA(A)	0	0	0	0	0	0	0	0	0	0	19	0	0	0	0	0	0	17	0	0	0	0	0	0	0	0	0
hsa-miR-3124-5p#Canonical_RC	0	0	0	0	0	0	0	0	0	0	0	0	0	0	0	0	0	0	0	0	0	0	0	26	0	0	0
hsa-miR-3124-5p#NTA(A)	0	0	0	0	0	0	0	0	0	0	0	0	0	0	0	0	0	0	0	0	0	0	0	1	0	0	0
hsa-miR-3129-3p#mv	0	0	0	0	0	0	0	0	0	0	0	0	0	0	0	0	0	0	0	0	0	21	0	0	0	0	0
hsa-miR-3131#lv3pT	0	0	0	0	0	0	0	0	0	0	0	0	0	0	0	0	0	13	0	0	0	0	18	0	0	0	0
hsa-miR-3138#mv	0	0	0	0	0	0	0	0	0	0	0	0	1	0	0	0	0	0	0	0	0	0	0	0	0	0	0
hsa-miR-3138#NTA(G)	1	0	0	0	0	0	0	0	0	0	0	0	0	0	0	0	0	0	0	0	0	0	0	0	0	0	0
hsa-miR-3140-3p#NTA(A)	0	0	0	0	0	0	0	0	0	0	0	0	0	0	0	0	0	0	0	0	0	0	10	0	0	0	0
hsa-miR-3144-3p#mv	0	0	0	0	0	0	0	0	0	0	0	0	0	0	0	0	0	0	25	0	0	0	0	0	0	0	0
hsa-miR-3144-3p#NTA(U)	0	0	0	0	0	0	21	0	0	0	0	0	0	0	0	0	0	0	0	0	0	0	0	0	0	0	0
hsa-miR-3148#Canonical_RC	0	0	0	0	0	0	20	0	0	0	0	0	0	0	0	0	0	0	0	0	0	0	0	0	0	0	0
hsa-miR-3148#lv3pT	0	0	0	0	0	0	0	11	0	0	0	0	11	0	0	0	0	0	0	0	0	0	0	0	0	0	0
hsa-miR-3148#NTA(A)	0	0	0	0	0	0	0	0	0	0	0	0	16	0	0	0	10	0	16	0	0	0	0	0	0	0	0
hsa-miR-3150a-5p#lv5pE	0	0	0	0	0	0	0	0	0	0	0	0	0	0	0	0	0	0	0	0	21	20	0	0	0	0	0
hsa-miR-3158-3p#Canonical_RC	0	0	0	0	0	0	0	0	0	0	0	0	0	0	0	0	0	0	0	0	0	0	16	0	0	0	0
hsa-miR-3158-3p#lv3pT	0	0	0	0	0	0	0	0	0	0	0	0	0	25	0	0	0	0	0	0	0	0	0	0	0	0	0
hsa-miR-3168#mv	0	0	0	1	0	0	0	0	0	0	0	0	0	0	0	0	0	0	0	0	0	0	0	0	0	0	0
hsa-miR-3169#mv	20	0	0	0	0	0	0	0	0	0	0	0	0	0	0	0	0	0	0	0	0	0	0	0	0	0	0
hsa-miR-3173-5p#Canonical_RC	0	0	0	0	0	0	0	18	0	0	0	0	0	0	0	0	0	0	0	0	0	0	0	0	0	0	0
hsa-miR-3173-5p#NTA(C)	6	0	0	0	0	0	0	0	0	0	0	0	0	0	0	0	0	0	0	0	0	0	0	0	0	0	0
hsa-miR-3178#mv	0	0	0	0	0	0	0	0	0	0	0	0	0	0	0	0	0	1	0	0	0	0	0	0	0	0	0
hsa-miR-3179#lv5pE	0	16	0	0	0	0	0	0	0	0	0	0	0	0	0	0	0	0	0	0	0	0	0	0	0	0	0
hsa-miR-3180-3p#Canonical_RC	0	0	0	0	19	0	0	0	0	0	0	0	0	0	0	0	0	0	0	5	0	0	4	0	0	0	0
hsa-miR-3180-3p#lv3pT	0	0	3	11	1	0	0	0	0	0	20	0	3	0	0	0	0	0	0	0	0	0	0	0	0	0	0
hsa-miR-3180-3p#NTA(A)	0	7	0	0	0	8	62	0	0	21	9	0	16	17	12	0	0	7	0	3	9	0	33	0	0	11	0
hsa-miR-3180-3p#NTA(G)	0	0	0	0	0	0	0	0	0	0	0	0	0	0	0	0	0	4	0	0	0	0	8	0	0	0	0
hsa-miR-3180-3p#NTA(U)	0	0	7	0	0	0	0	0	0	0	0	0	0	0	0	0	0	20	0	0	0	0	0	0	0	0	0
hsa-miR-3180-5p#lv3pT	15	0	16	99	37	20	325	0	59	90	81	0	11	31	0	46	21	0	14	39	0	0	31	0	0	0	6
hsa-miR-3180-5p#lv5pT	0	0	0	0	0	0	0	0	0	0	0	0	0	0	0	0	0	0	0	0	17	0	0	0	0	0	0
hsa-miR-3180-5p#mv	0	22	0	0	0	0	0	0	0	0	0	0	0	0	0	0	0	0	0	0	0	0	0	0	0	0	0
hsa-miR-3180-5p#NTA(A)	12	0	0	0	0	0	17	0	0	35	0	0	12	16	48	25	21	21	0	15	13	0	43	0	0	19	19
hsa-miR-3180-5p#NTA(C)	0	0	0	0	0	0	0	0	0	0	0	0	0	0	0	0	26	0	0	0	0	0	0	0	0	0	0
hsa-miR-3180-5p#NTA(U)	0	0	0	18	0	0	20	0	7	24	0	0	0	0	0	0	0	0	0	0	0	0	0	0	0	0	0
hsa-miR-3180#Canonical_RC	0	0	0	0	0	0	0	0	0	0	0	0	3	0	0	0	0	0	0	0	0	0	0	0	0	0	0
hsa-miR-3180#lv3pE	0	0	3	11	20	0	0	0	0	0	20	0	0	0	0	0	0	0	0	5	0	0	4	0	0	0	0
hsa-miR-3180#NTA(A)	0	7	0	0	0	8	45	0	0	11	9	0	16	11	12	0	0	7	0	3	0	0	33	0	0	11	0
hsa-miR-3180#NTA(G)	0	0	0	0	0	0	0	0	0	0	0	0	0	0	0	0	0	4	0	0	0	0	8	0	0	0	0
hsa-miR-3180#NTA(U)	0	0	7	0	0	0	0	0	0	0	0	0	0	0	0	0	0	20	0	0	0	0	0	0	0	0	0
hsa-miR-3184-3p#mv	0	0	0	0	0	0	0	0	0	0	0	0	0	0	0	0	0	0	0	0	0	0	0	0	0	18	0
hsa-miR-3187-3p#lv3pE	0	0	0	0	0	0	0	0	0	0	0	0	0	0	0	0	0	0	0	0	0	0	17	0	0	0	0
hsa-miR-3187-3p#NTA(A)	0	0	0	0	0	0	0	0	0	0	0	0	0	0	0	0	0	0	0	0	0	0	3	0	0	0	0
hsa-miR-3187-3p#NTA(G)	0	0	0	0	0	0	0	0	0	0	0	0	0	0	0	0	0	0	0	0	0	0	1	0	0	0	0
hsa-miR-3190-3p#NTA(C)	0	0	0	0	0	0	0	0	0	0	0	0	0	0	0	0	0	0	0	0	0	0	0	1	0	0	0
hsa-miR-3191-3p#NTA(U)	0	0	0	0	0	0	0	0	0	0	0	0	0	0	0	0	0	0	0	0	0	0	0	0	0	0	7
hsa-miR-3199#mv	0	0	0	0	0	0	0	0	0	0	0	0	0	0	0	0	0	0	0	0	14	0	0	0	0	0	0
hsa-miR-32-5p#Canonical_RC	10	0	0	0	0	0	0	0	9	0	14	0	0	0	13	0	0	0	0	0	0	0	0	0	0	0	0
hsa-miR-32-5p#lv3pT	0	16	12	0	0	0	0	0	0	0	0	0	0	0	0	10	0	0	0	0	0	0	0	0	0	0	0
hsa-miR-32-5p#NTA(A)	0	1	0	0	0	0	0	0	0	0	0	0	0	0	0	0	0	0	0	0	0	0	0	0	0	0	0
hsa-miR-3200-3p#NTA(A)	0	0	0	0	0	0	0	0	0	0	0	0	0	0	0	0	0	0	0	0	0	0	23	0	0	0	0
hsa-miR-320a-3p#Canonical_RC	29	0	0	0	18	0	1	0	7	0	24	0	0	15	0	0	0	16	0	0	0	19	63	0	0	0	0
hsa-miR-320a-3p#lv3pE	0	24	15	0	0	0	0	0	0	0	0	0	37	31	40	34	20	34	35	16	14	23	84	11	0	43	0
hsa-miR-320a-3p#lv3pT	40	63	39	0	25	0	5	0	0	20	17	12	0	0	0	0	0	70	28	0	14	0	18	41	0	0	0
hsa-miR-320a-3p#mv	0	0	0	0	0	0	0	0	0	0	0	0	14	16	0	0	0	0	22	0	0	0	0	0	0	0	0
hsa-miR-320a-3p#NTA(A)	0	0	0	0	0	0	0	0	0	0	0	0	9	14	18	5	102	0	1	0	13	0	0	0	0	0	0
hsa-miR-320a-3p#NTA(C)	0	0	0	0	22	0	0	0	0	0	0	0	0	0	0	0	0	14	0	16	0	0	19	0	0	0	0
hsa-miR-320a-3p#NTA(G)	0	1	10	0	0	0	0	0	0	7	0	0	27	15	0	25	0	29	28	19	18	0	0	0	0	10	19
hsa-miR-320a-3p#NTA(U)	158	120	61	229	147	81	246	54	136	88	100	182	0	0	14	0	0	49	60	17	54	0	87	0	0	21	44
hsa-miR-320b#lv3pE	0	0	0	0	0	0	0	0	0	0	0	0	1	0	0	0	0	0	0	0	0	0	0	0	0	0	0
hsa-miR-320b#lv3pT	0	63	0	0	0	0	0	0	0	0	0	0	0	0	0	0	0	70	28	0	14	0	17	41	0	0	0
hsa-miR-320b#NTA(A)	0	0	0	0	0	0	0	0	0	0	0	0	0	0	0	0	0	0	1	0	0	0	0	0	0	0	0
hsa-miR-320b#NTA(C)	0	0	0	0	22	0	0	0	0	0	0	0	0	0	0	0	0	0	0	0	0	0	0	0	0	0	0
hsa-miR-320b#NTA(U)	0	0	0	0	1	0	1	0	0	0	0	0	0	0	0	0	0	0	0	0	0	0	0	0	0	0	0
hsa-miR-320c#lv3pT	0	0	0	0	0	0	0	0	0	0	0	0	0	0	0	0	0	18	0	0	0	0	0	0	0	0	0
hsa-miR-320c#NTA(A)	0	0	0	0	0	0	0	0	0	0	0	0	0	0	0	0	0	0	1	0	0	0	0	0	0	0	0
hsa-miR-320d#Canonical_RC	0	0	0	0	0	0	0	0	0	0	0	0	26	0	0	0	0	0	0	0	0	0	0	0	0	0	0
hsa-miR-320d#lv3pT	0	0	0	0	0	0	0	0	0	0	0	0	0	0	0	0	0	18	0	0	0	0	0	0	0	0	0
hsa-miR-320d#NTA(A)	0	0	0	0	0	0	0	0	0	0	0	0	0	0	0	0	0	0	0	0	0	0	20	0	0	0	0
hsa-miR-320d#NTA(G)	0	0	0	0	0	0	0	0	0	0	0	0	1	0	0	0	0	0	0	0	0	0	0	0	0	0	0
hsa-miR-328-3p#Canonical_RC	0	0	0	0	0	0	0	0	0	0	8	0	0	0	0	0	0	0	0	0	0	0	0	0	0	0	0
hsa-miR-328-3p#NTA(A)	0	0	0	0	0	0	0	0	0	0	0	0	0	0	0	0	13	0	0	0	0	0	0	0	0	0	0
hsa-miR-328-3p#NTA(U)	15	0	0	0	0	0	0	0	0	0	0	0	0	0	0	0	0	0	0	0	0	0	0	0	0	0	0
hsa-miR-330-3p#lv3pE	0	0	0	0	0	0	0	0	0	0	0	0	0	0	0	0	0	0	0	0	0	0	53	0	0	0	0
hsa-miR-330-3p#mv	0	0	0	0	0	0	0	0	0	0	0	0	0	0	0	0	0	0	0	0	0	0	26	0	0	0	0
hsa-miR-330-3p#NTA(A)	0	0	0	0	0	0	0	0	0	0	0	0	0	0	0	0	0	0	0	0	0	0	41	0	0	0	0
hsa-miR-335-3p#Canonical_RC	0	0	0	0	20	0	0	0	0	0	0	0	0	0	0	0	0	63	9	0	16	0	30	0	0	0	0
hsa-miR-335-3p#lv3pT	11	0	0	17	0	0	45	18	0	17	0	0	27	0	0	0	21	51	17	11	0	0	17	6	0	13	0
hsa-miR-335-3p#lv5pE	13	0	0	0	0	0	0	0	0	16	0	0	0	0	0	0	0	0	0	0	0	0	0	0	0	0	0
hsa-miR-335-3p#NTA(A)	9	11	0	17	0	0	0	0	0	0	0	21	19	35	14	0	17	37	33	10	9	23	26	0	0	0	0
hsa-miR-335-3p#NTA(C)	0	0	0	0	0	0	0	0	0	0	0	0	0	23	0	0	0	0	0	0	0	0	0	0	0	0	0
hsa-miR-335-3p#NTA(G)	0	0	0	0	0	0	0	0	0	0	22	0	0	0	0	0	0	21	0	0	0	0	0	0	0	0	0
hsa-miR-335-5p#lv3pT	0	0	0	0	34	0	19	0	26	24	0	0	6	0	0	23	24	18	0	0	0	0	0	0	0	0	0
hsa-miR-339-3p#Canonical_RC	0	0	0	0	0	0	0	0	0	0	17	0	0	0	0	0	0	0	0	0	0	0	0	0	0	0	0
hsa-miR-339-3p#lv3pT	37	13	9	0	0	12	0	0	20	10	30	6	31	0	40	0	11	0	0	0	14	0	0	0	0	0	0
hsa-miR-339-3p#NTA(U)	0	0	0	0	3	0	0	0	0	0	0	0	0	0	0	0	0	0	0	0	0	0	0	0	0	0	0
hsa-miR-339-5p#lv3pE	0	0	0	0	0	0	0	0	0	0	0	0	0	0	0	0	0	0	0	0	0	0	0	0	8	0	0
hsa-miR-339-5p#NTA(A)	0	0	0	0	0	0	0	0	0	0	0	0	0	10	0	0	0	0	0	0	0	0	13	0	0	0	0
hsa-miR-33a-5p#NTA(G)	0	0	0	0	0	0	0	0	0	0	0	0	15	0	0	0	0	0	0	0	0	0	0	0	0	0	0
hsa-miR-340-3p#Canonical_RC	0	0	8	24	0	0	0	0	16	16	0	17	11	0	20	37	0	11	0	0	0	0	0	0	0	0	24
hsa-miR-340-3p#lv3pE	0	23	24	0	8	0	13	0	20	82	38	35	0	0	33	46	61	17	0	0	0	36	0	0	0	13	19
hsa-miR-340-3p#lv3pT	11	0	0	0	0	0	0	0	12	0	0	19	0	0	0	0	0	0	0	0	0	0	0	0	0	0	0
hsa-miR-340-3p#lv5pE	0	0	0	0	0	0	0	0	0	0	0	0	0	0	0	0	0	0	0	0	0	0	20	0	0	0	0
hsa-miR-340-3p#NTA(A)	0	0	0	0	0	0	0	0	0	0	0	0	0	0	0	1	0	0	0	0	0	0	0	0	0	0	0
hsa-miR-340-3p#NTA(U)	0	0	0	0	0	0	0	0	0	0	0	14	0	0	0	0	0	0	0	0	0	0	0	0	0	0	0
hsa-miR-340-5p#Canonical_RC	14	40	0	0	0	0	14	0	0	0	0	37	0	0	21	13	0	43	49	0	0	0	66	29	0	11	0
hsa-miR-340-5p#lv3pT	32	0	0	0	16	0	23	11	0	0	0	13	54	36	0	0	0	36	0	0	0	0	11	0	0	0	0
hsa-miR-340-5p#NTA(A)	0	0	0	0	0	0	0	0	0	0	0	0	0	0	0	12	0	16	0	0	0	0	16	0	0	0	0
hsa-miR-342-5p#lv3pE	0	0	0	0	0	0	0	0	0	0	0	14	0	0	0	0	0	0	0	0	0	0	0	0	0	0	0
hsa-miR-345-5p#Canonical_RC	0	11	0	25	0	0	0	0	0	0	15	18	0	0	0	0	0	0	0	0	0	0	21	0	14	0	0
hsa-miR-345-5p#NTA(A)	0	0	0	0	0	0	0	0	0	0	0	0	0	0	0	9	0	0	0	0	0	0	0	0	0	0	0
hsa-miR-345-5p#NTA(G)	0	0	0	0	0	0	0	0	14	0	0	0	0	0	0	0	0	0	0	0	0	0	0	0	0	0	0
hsa-miR-34c-5p#Canonical_RC	0	0	0	0	0	0	0	0	0	0	0	0	0	15	0	0	0	19	17	0	0	0	47	0	0	0	0
hsa-miR-34c-5p#lv3pT	0	0	0	0	0	0	0	0	0	0	0	0	0	0	0	0	17	13	0	0	0	0	0	0	0	0	0
hsa-miR-34c-5p#mv	0	0	0	0	0	0	0	0	0	0	0	0	0	0	0	0	1	0	0	0	0	0	17	0	0	0	20
hsa-miR-3529-3p#mv	0	0	0	0	0	0	0	0	0	0	0	0	0	0	0	0	0	0	0	0	18	0	0	0	0	0	0
hsa-miR-3609#lv3pE	0	0	0	0	0	0	0	0	0	0	0	0	0	0	0	0	0	26	0	0	0	0	0	0	0	0	0
hsa-miR-3609#mv	12	0	0	0	0	0	0	0	0	0	0	0	0	0	0	0	0	0	0	0	0	0	0	0	0	0	0
hsa-miR-361-3p#lv3pE	10	0	0	0	0	0	0	0	0	0	0	0	0	11	0	0	17	0	0	0	0	0	0	0	0	0	0
hsa-miR-361-3p#mv	0	0	0	0	0	0	23	0	21	0	24	0	0	0	0	0	21	0	0	0	0	0	0	0	0	0	7
hsa-miR-361-3p#NTA(A)	0	0	0	0	0	0	0	0	0	0	15	0	12	15	11	17	24	31	0	0	0	0	21	21	0	0	0
hsa-miR-361-3p#NTA(C)	0	0	0	0	0	0	0	0	1	0	0	0	0	0	0	0	0	0	0	0	0	0	0	0	0	0	0
hsa-miR-361-3p#NTA(G)	1	0	0	0	0	0	0	0	0	0	0	0	0	0	0	1	0	0	0	0	0	0	1	0	0	0	0
hsa-miR-361-3p#NTA(U)	0	0	8	0	11	9	0	0	0	14	0	16	0	10	0	19	0	0	0	0	0	0	0	0	0	0	0
hsa-miR-361-5p#lv3pT	0	0	0	0	0	0	0	0	0	0	23	0	0	0	0	0	0	0	0	0	0	0	0	0	0	0	0
hsa-miR-3613-5p#Canonical_RC	0	0	0	15	0	0	0	0	0	0	0	0	0	0	0	0	0	0	0	0	0	0	25	14	5	0	11
hsa-miR-3613-5p#NTA(A)	0	0	0	0	0	0	0	0	0	0	0	0	0	0	13	0	0	0	0	0	0	0	3	1	0	0	0
hsa-miR-3615#Canonical_RC	0	0	0	0	0	0	0	1	0	0	12	0	0	0	0	0	0	0	0	0	0	0	0	0	0	0	0
hsa-miR-3615#lv3pE	8	37	0	0	0	0	13	0	0	14	29	0	19	0	19	0	0	0	0	0	0	0	0	0	0	0	0
hsa-miR-3615#lv3pT	0	0	0	0	0	0	0	0	14	0	0	0	0	0	0	0	0	0	0	0	0	0	0	0	0	0	0
hsa-miR-3615#NTA(A)	0	1	0	0	0	0	0	0	0	0	0	0	0	0	9	0	0	0	0	0	0	0	27	0	0	0	0
hsa-miR-3615#NTA(G)	0	0	0	0	0	0	0	0	0	0	0	0	0	0	20	0	0	0	0	0	0	0	0	0	0	0	0
hsa-miR-3615#NTA(U)	0	0	0	0	0	0	0	0	0	0	0	0	8	0	0	0	0	0	0	0	0	0	0	0	0	0	0
hsa-miR-362-5p#Canonical_RC	0	0	0	0	20	0	0	0	0	0	0	0	0	0	0	0	0	0	0	0	0	0	0	0	0	0	0
hsa-miR-362-5p#NTA(A)	0	0	0	0	0	0	0	0	0	0	0	0	0	0	0	0	0	0	0	0	0	0	18	0	0	0	0
hsa-miR-363-3p#Canonical_RC	0	0	0	0	0	0	0	0	0	0	0	0	0	0	0	0	0	22	20	0	26	13	38	23	0	12	47
hsa-miR-363-3p#lv3pE	0	0	0	0	0	0	0	0	0	0	0	0	0	0	0	0	0	0	0	0	0	0	0	18	0	0	0
hsa-miR-363-3p#lv3pT	0	0	0	0	0	0	22	0	0	0	0	0	0	0	0	0	0	0	0	0	0	0	0	0	0	0	0
hsa-miR-363-3p#lv5pT	0	0	0	0	0	0	0	0	0	0	0	0	0	0	0	0	0	0	0	0	9	0	0	0	0	0	0
hsa-miR-363-3p#NTA(A)	0	0	0	0	0	0	0	0	0	0	0	0	0	0	0	0	0	0	0	0	1	0	0	0	0	0	0
hsa-miR-363-3p#NTA(U)	0	0	0	0	0	0	0	0	0	0	0	0	0	0	0	0	0	0	0	0	0	1	0	0	0	0	0
hsa-miR-3654#mv	0	16	0	0	0	0	0	0	0	0	0	0	0	0	0	0	0	0	0	0	0	0	0	0	0	0	0
hsa-miR-365a-5p#Canonical_RC	0	0	0	0	0	0	0	0	0	0	0	0	0	0	0	0	0	0	0	0	0	0	0	13	0	0	0
hsa-miR-3681-5p#Canonical_RC	0	0	0	0	0	0	0	0	16	11	0	0	0	11	0	0	0	0	0	0	0	0	0	0	0	0	0
hsa-miR-3681-5p#lv5pT	1	0	0	0	0	0	0	0	0	0	0	0	0	0	0	0	0	0	0	0	0	0	0	0	0	0	0
hsa-miR-3689f#Canonical_RC	0	0	0	0	0	0	0	0	0	0	0	0	0	0	0	0	0	0	15	0	0	0	1	0	9	0	0
hsa-miR-370-3p#Canonical_RC	0	0	0	0	0	0	0	0	0	0	0	0	0	0	0	0	0	0	0	0	0	0	0	0	0	15	0
hsa-miR-371a-3p#Canonical_RC	21	0	33	98	77	39	140	0	56	96	87	37	8	36	78	0	120	52	17	39	13	24	54	19	21	13	15
hsa-miR-371a-3p#lv3pE	0	0	0	0	0	0	0	0	0	0	0	0	0	0	0	0	0	0	0	13	0	0	0	0	0	0	0
hsa-miR-371a-3p#lv3pT	31	0	7	15	38	14	19	0	62	91	19	54	5	23	42	19	15	41	20	0	18	15	69	13	21	73	48
hsa-miR-371a-3p#lv5pT	12	14	45	75	32	17	30	20	99	114	106	23	0	10	69	0	65	32	14	22	15	0	31	0	62	17	13
hsa-miR-371a-3p#mv	0	0	11	0	0	7	40	14	0	0	0	21	0	0	0	0	14	0	0	0	13	18	0	0	0	0	0
hsa-miR-371a-3p#NTA(A)	0	0	1	0	0	7	14	0	14	49	34	16	18	53	27	21	44	22	0	14	33	1	4	16	15	13	0
hsa-miR-371a-3p#NTA(C)	0	0	0	0	0	0	0	0	0	0	0	1	0	0	0	0	0	0	0	0	0	0	0	0	0	0	0
hsa-miR-371a-3p#NTA(G)	0	0	0	0	0	0	1	0	0	0	0	0	0	0	0	0	0	19	0	0	0	0	0	0	0	0	0
hsa-miR-371a-3p#NTA(U)	0	0	0	0	16	0	0	0	19	0	13	0	0	1	0	0	0	0	0	0	0	0	23	0	0	0	0
hsa-miR-371a-5p#Canonical_RC	34	12	0	23	0	0	12	0	0	11	0	11	0	0	0	0	0	30	14	0	0	0	0	15	17	0	0
hsa-miR-371a-5p#lv3pE	107	88	4	36	61	14	149	0	98	160	160	132	0	44	0	0	13	114	64	0	0	13	576	85	111	33	10
hsa-miR-371a-5p#lv3pT	71	35	0	0	51	20	108	13	56	108	80	49	0	33	0	0	0	44	22	12	22	0	42	0	0	8	0
hsa-miR-371a-5p#lv5pT	0	0	0	0	0	0	0	0	0	0	0	0	0	0	0	0	0	0	21	0	0	0	0	0	0	0	0
hsa-miR-371a-5p#mv	0	0	0	0	0	0	0	0	0	0	0	0	0	0	0	0	0	0	0	0	0	0	68	0	0	0	0
hsa-miR-371a-5p#NTA(A)	6	0	0	12	11	0	97	0	31	49	24	31	135	235	97	14	0	433	35	50	12	0	268	52	0	51	17
hsa-miR-371a-5p#NTA(C)	0	0	0	0	0	0	0	0	0	0	0	0	5	0	0	0	0	15	0	0	0	0	0	0	0	7	0
hsa-miR-371a-5p#NTA(G)	0	0	2	0	0	15	30	9	0	15	1	0	0	57	0	0	15	123	0	15	0	0	113	0	0	37	19
hsa-miR-371a-5p#NTA(U)	0	9	0	0	0	0	20	0	6	0	0	0	0	1	0	0	0	25	0	0	0	0	0	0	0	0	0
hsa-miR-372-3p#Canonical_RC	10428	7751	5100	7707	9183	5838	19504	2418	10719	11501	8109	7941	6287	9221	4315	4035	5436	23399	6440	2930	2661	1634	27176	8099	3895	3754	4535
hsa-miR-372-3p#lv3pT	1660	779	762	1682	1354	646	3259	325	2082	2393	1481	1797	920	1134	1344	1313	1688	2742	888	256	520	344	2123	709	195	626	861
hsa-miR-372-3p#lv5pE	18	0	0	0	0	0	0	0	16	0	0	0	0	0	0	0	0	0	0	0	0	0	0	0	0	0	0
hsa-miR-372-3p#lv5pT	1445	787	586	717	885	458	1658	191	1341	1089	809	1016	1268	1702	560	569	743	3975	1041	296	247	147	5251	1752	644	498	611
hsa-miR-372-3p#mv	85	72	68	34	40	32	242	40	87	191	136	96	0	37	48	28	51	108	58	12	36	20	98	0	0	22	20
hsa-miR-372-3p#NTA(A)	305	179	163	216	164	156	1373	44	592	714	725	834	996	1939	1129	1098	1578	5266	910	552	573	627	3355	1353	408	739	696
hsa-miR-372-3p#NTA(C)	1	0	0	1	1	0	4	0	1	2	2	1	17	0	2	0	1	22	1	16	0	0	8	0	0	0	2
hsa-miR-372-3p#NTA(G)	31	31	4	3	2	0	29	0	16	43	0	16	64	113	50	53	93	126	31	0	0	0	191	131	0	146	26
hsa-miR-372-3p#NTA(U)	61	134	26	79	37	40	118	1	106	71	19	59	34	44	28	2	28	219	91	18	12	0	122	85	1	18	16
hsa-miR-372-5p#lv3pT	17	0	0	19	0	0	55	14	19	92	24	0	26	25	18	0	0	33	0	16	19	0	0	0	0	0	45
hsa-miR-372-5p#NTA(A)	0	0	0	0	0	0	0	1	0	1	0	0	0	0	0	0	0	0	0	0	0	0	0	0	0	0	0
hsa-miR-373-3p#Canonical_RC	137	152	21	6	27	37	276	22	143	25	49	56	74	41	59	0	18	67	37	0	0	0	507	129	31	22	15
hsa-miR-373-3p#lv3pT	5	0	0	0	0	10	19	0	7	41	0	0	0	0	0	0	9	0	0	0	0	0	0	0	0	0	0
hsa-miR-373-3p#lv5pT	0	0	0	0	0	0	0	0	0	0	0	0	0	0	0	0	0	13	0	0	0	0	0	0	0	0	0
hsa-miR-373-3p#mv	0	0	0	0	0	0	0	0	17	0	0	0	0	0	0	0	0	0	0	0	0	0	0	0	0	0	0
hsa-miR-373-3p#NTA(A)	18	22	1	1	13	0	39	8	0	30	15	0	72	130	45	60	141	354	0	16	19	32	245	67	71	36	90
hsa-miR-373-3p#NTA(C)	0	0	0	0	0	0	0	0	1	0	0	0	1	0	0	0	0	0	0	0	0	0	1	0	0	0	0
hsa-miR-373-3p#NTA(G)	0	0	0	0	0	0	0	0	0	0	0	0	0	32	13	12	0	56	14	0	11	0	26	15	0	0	0
hsa-miR-373-3p#NTA(U)	0	0	0	0	11	0	0	0	0	0	0	0	19	0	0	0	0	0	0	0	0	0	0	0	0	0	0
hsa-miR-373-5p#lv3pT	0	0	0	0	0	17	0	0	0	0	0	0	0	0	0	0	0	0	0	0	0	0	0	0	0	0	0
hsa-miR-373-5p#mv	0	0	0	0	0	0	0	0	0	0	0	0	0	0	0	0	0	0	0	0	0	0	18	0	0	0	0
hsa-miR-373-5p#NTA(A)	0	0	0	0	0	0	0	0	0	0	0	0	0	0	0	0	0	0	0	0	0	0	12	0	0	0	0
hsa-miR-374a-3p#Canonical_RC	0	4	0	0	0	0	0	0	0	26	0	0	0	21	0	0	0	0	22	0	0	0	0	0	0	0	0
hsa-miR-374a-3p#lv3pE	0	0	0	0	0	0	0	0	0	29	0	0	0	16	0	0	0	0	0	0	0	0	0	0	0	0	0
hsa-miR-374a-3p#lv3pT	0	0	0	0	0	0	0	0	0	0	0	0	0	0	0	0	24	0	0	0	0	0	0	0	0	0	0
hsa-miR-374a-3p#NTA(A)	0	0	0	0	0	0	0	0	0	0	0	0	14	0	0	0	0	0	28	0	0	0	0	0	0	0	0
hsa-miR-374a-3p#NTA(G)	0	0	0	0	0	0	0	0	0	0	0	0	0	0	0	0	0	0	1	0	0	0	0	0	0	0	0
hsa-miR-374a-5p#Canonical_RC	14	0	0	0	0	0	0	0	0	0	0	0	0	0	0	0	0	0	0	0	0	0	0	0	0	0	0
hsa-miR-374a-5p#lv3pT	0	0	10	0	0	0	0	0	0	0	0	0	0	0	0	0	0	0	0	0	0	0	0	0	0	0	0
hsa-miR-374a-5p#NTA(A)	0	0	0	0	0	0	0	0	0	0	0	0	0	0	0	0	0	0	0	0	0	4	0	0	0	0	0
hsa-miR-374b-5p#Canonical_RC	0	0	0	0	0	0	0	0	0	0	0	0	12	0	0	0	0	0	0	0	0	0	0	0	0	0	0
hsa-miR-375-3p#Canonical_RC	0	0	0	0	0	0	0	0	0	0	0	0	0	0	0	0	0	204	19	0	10	0	72	26	0	11	0
hsa-miR-375-3p#lv3pT	0	0	1	0	0	0	0	0	0	0	0	0	0	0	0	0	0	0	0	0	0	0	16	0	0	12	0
hsa-miR-375-3p#NTA(A)	0	0	0	0	0	0	0	0	0	0	0	0	0	0	0	0	0	0	16	0	0	0	0	0	0	0	0
hsa-miR-378a-3p#Canonical_RC	58	84	0	12	0	0	19	0	31	16	54	0	53	17	0	0	18	43	30	0	37	0	659	28	72	88	0
hsa-miR-378a-3p#lv3pE	0	12	0	0	0	0	21	0	0	0	0	0	0	0	0	0	0	0	0	0	0	0	1	0	0	0	0
hsa-miR-378a-3p#lv3pT	27	22	0	0	0	0	0	0	0	0	0	0	7	0	0	0	0	40	43	0	0	0	47	17	0	0	0
hsa-miR-378a-3p#lv5pT	9	0	1	0	0	0	0	0	0	0	0	0	0	0	0	0	0	0	0	0	0	0	37	62	0	0	0
hsa-miR-378a-3p#NTA(A)	19	11	0	0	0	0	0	0	11	19	17	0	11	33	9	0	0	49	0	0	0	0	387	32	0	43	0
hsa-miR-378a-3p#NTA(C)	0	1	0	0	0	0	0	0	0	0	0	0	0	0	0	0	0	0	0	0	0	0	0	0	0	0	0
hsa-miR-378a-3p#NTA(G)	0	0	0	0	0	0	0	0	0	0	0	0	0	0	0	0	0	0	0	0	0	0	19	0	0	1	0
hsa-miR-378a-3p#NTA(U)	69	13	0	0	48	0	29	11	22	64	57	14	23	13	16	0	0	19	0	0	0	0	0	19	0	0	13
hsa-miR-378a-5p#lv3pE	0	0	0	0	0	0	0	0	0	0	0	0	0	0	0	0	0	20	0	0	0	0	0	0	0	0	0
hsa-miR-378a-5p#lv5pT	9	0	0	0	0	0	0	0	0	0	0	0	0	0	0	0	0	0	0	0	0	0	0	0	0	0	0
hsa-miR-378a-5p#NTA(A)	0	0	0	0	0	0	0	0	0	0	0	0	0	0	0	0	0	14	0	0	0	0	0	0	0	0	0
hsa-miR-378b#lv3pT	1	0	0	0	0	0	0	0	0	0	0	0	0	0	0	0	0	0	0	0	0	0	0	0	0	0	0
hsa-miR-378b#NTA(C)	0	0	0	0	0	0	0	0	0	0	0	0	0	0	0	0	0	0	0	0	0	0	1	1	0	0	0
hsa-miR-378c#lv3pT	27	22	0	0	0	0	0	0	0	0	0	0	0	0	0	0	0	0	17	0	0	0	0	0	0	0	0
hsa-miR-378d#lv3pT	12	22	0	0	0	0	0	0	0	0	0	0	0	0	0	0	0	0	17	0	0	0	0	0	0	0	0
hsa-miR-378g#NTA(A)	1	0	0	0	0	0	0	0	0	0	0	0	0	0	0	0	0	0	0	0	0	0	1	0	0	0	0
hsa-miR-378g#NTA(U)	0	0	0	0	0	0	0	0	0	0	0	0	10	0	0	0	0	0	0	0	0	0	0	0	0	0	0
hsa-miR-378i#NTA(A)	0	0	0	0	0	0	0	0	0	0	0	0	1	0	0	0	0	0	0	0	0	0	1	1	0	0	0
hsa-miR-378i#NTA(C)	0	0	0	0	0	0	0	0	0	0	0	0	0	0	0	0	0	1	0	0	0	0	5	0	0	0	0
hsa-miR-381-3p#Canonical_RC	0	0	0	0	0	0	0	0	0	0	0	0	0	0	0	0	0	0	0	0	0	0	14	31	0	0	0
hsa-miR-3913-5p#lv3pT	0	0	0	0	0	0	0	0	0	0	0	0	0	0	0	0	12	0	0	0	0	0	0	0	0	0	0
hsa-miR-3913-5p#NTA(A)	0	0	0	0	0	0	0	0	0	0	0	23	0	0	0	0	0	0	0	0	0	0	0	0	0	0	0
hsa-miR-3925-3p#lv5pE	0	0	0	0	0	0	0	0	0	0	0	0	0	0	0	0	0	10	0	0	0	0	0	0	0	0	0
hsa-miR-3925-5p#Canonical_RC	0	0	0	0	0	0	0	0	0	0	0	0	0	0	0	0	0	0	0	0	0	0	0	0	0	11	0
hsa-miR-3928-3p#lv3pT	0	0	0	0	0	0	0	0	0	0	0	0	0	0	0	0	0	0	0	0	0	0	10	0	0	0	0
hsa-miR-3928-3p#NTA(U)	0	0	0	0	0	0	14	0	0	0	0	0	0	0	0	0	0	0	0	0	0	0	0	0	0	0	0
hsa-miR-3934-5p#lv3pE	0	0	0	0	0	0	0	0	0	0	0	0	0	0	0	0	0	21	0	0	0	0	0	0	0	0	0
hsa-miR-3937#lv3pT	0	0	0	0	0	0	0	0	0	0	0	0	0	0	0	0	0	0	0	0	0	0	0	0	0	0	14
hsa-miR-3940-3p#NTA(U)	6	0	0	0	0	0	0	0	0	0	0	0	0	0	0	0	0	0	0	0	0	0	0	0	0	0	0
hsa-miR-3976#mv	0	0	0	0	0	0	0	0	0	0	0	0	0	3	0	0	0	1	3	0	0	0	0	0	0	0	0
hsa-miR-409-3p#Canonical_RC	0	0	0	0	0	0	0	0	0	0	0	0	0	0	0	0	0	0	0	0	0	20	0	0	0	25	0
hsa-miR-409-3p#lv5pE	0	0	0	0	0	0	0	0	0	0	0	0	0	0	0	0	0	0	0	0	0	0	3	0	0	0	0
hsa-miR-409-3p#lv5pT	0	0	0	0	0	0	0	0	0	0	0	0	0	0	0	0	0	0	0	0	0	0	0	0	0	21	0
hsa-miR-411-5p#lv5pE	0	0	0	0	0	0	0	0	0	0	0	0	0	0	0	0	0	0	0	0	0	0	0	24	0	0	0
hsa-miR-421#lv5pT	0	0	0	0	0	0	0	0	0	0	0	0	0	0	0	0	0	0	0	0	0	0	15	0	0	0	0
hsa-miR-421#NTA(A)	0	0	0	0	0	0	0	0	0	0	0	0	0	0	0	0	0	23	0	0	0	0	0	0	0	0	0
hsa-miR-423-3p#Canonical_RC	57	80	4	16	111	47	43	9	52	96	0	38	36	0	0	26	18	0	13	0	0	0	124	25	0	8	0
hsa-miR-423-3p#lv3pT	39	13	18	32	53	51	108	0	73	60	41	76	8	0	0	44	20	0	24	0	0	0	11	21	15	53	40
hsa-miR-423-3p#lv5pE	8	16	0	0	17	0	0	0	27	15	0	0	0	0	0	0	0	26	0	0	0	0	68	0	0	0	0
hsa-miR-423-3p#lv5pT	0	0	0	0	0	0	0	0	0	0	5	0	0	0	0	0	0	0	0	0	0	0	0	0	0	0	0
hsa-miR-423-3p#mv	17	70	0	19	35	42	0	0	0	0	20	15	0	0	0	22	0	20	0	0	0	0	8	0	0	0	0
hsa-miR-423-3p#NTA(A)	32	1	0	24	0	0	82	12	33	82	0	35	61	29	17	40	67	65	47	39	0	0	124	30	0	70	11
hsa-miR-423-3p#NTA(C)	0	0	0	0	0	0	0	0	0	0	0	0	0	0	0	0	0	13	0	0	0	0	0	0	0	0	0
hsa-miR-423-3p#NTA(G)	0	1	0	0	0	0	0	0	10	0	16	0	0	13	33	0	0	13	0	0	0	0	14	0	0	17	0
hsa-miR-423-3p#NTA(U)	0	8	1	0	0	0	0	0	0	0	0	0	0	0	0	0	0	9	0	0	0	0	0	0	0	0	0
hsa-miR-423-5p#Canonical_RC	30	0	26	34	51	16	74	0	40	16	41	17	14	9	0	12	4	7	31	17	13	0	85	8	0	21	12
hsa-miR-423-5p#lv3pE	0	0	0	0	0	0	19	0	0	0	0	0	0	0	0	0	0	0	0	0	0	0	27	0	0	0	0
hsa-miR-423-5p#lv3pT	34	0	0	0	14	0	56	0	0	0	0	26	0	0	6	0	24	17	0	13	0	0	67	0	14	13	11
hsa-miR-423-5p#NTA(A)	0	0	0	0	13	0	21	0	0	0	0	0	21	0	0	15	9	50	21	7	0	0	0	0	0	0	0
hsa-miR-423-5p#NTA(G)	0	0	0	0	0	0	0	0	0	0	12	0	0	13	0	0	0	0	0	0	0	0	0	0	0	0	0
hsa-miR-424-3p#lv3pT	6	0	0	0	0	0	0	0	0	0	0	0	0	0	0	0	0	0	0	0	0	0	0	0	0	0	0
hsa-miR-425-5p#lv3pE	26	0	13	23	0	0	18	0	57	30	29	22	16	0	65	0	15	3	0	0	49	0	71	43	0	0	35
hsa-miR-425-5p#lv3pT	0	0	0	0	0	0	27	0	0	0	0	0	0	0	0	0	0	0	0	0	0	0	0	0	0	0	0
hsa-miR-425-5p#NTA(A)	0	0	0	0	0	0	0	0	0	0	0	0	0	0	0	0	18	0	0	0	13	0	17	22	0	0	0
hsa-miR-429#Canonical_RC	0	0	0	0	0	0	0	0	0	0	0	0	0	0	0	0	0	0	22	0	0	0	0	0	0	0	0
hsa-miR-4326#lv3pE	0	0	0	0	0	0	0	0	0	0	0	0	0	0	0	0	0	0	0	0	0	0	73	0	21	0	0
hsa-miR-433-3p#lv3pT	0	0	0	0	0	0	0	0	0	0	0	0	0	0	0	0	0	0	0	0	0	0	0	0	0	19	0
hsa-miR-433-3p#NTA(U)	0	0	0	0	0	0	0	0	0	0	0	0	0	0	0	0	0	0	0	0	0	0	17	0	0	0	0
hsa-miR-4418#mv	0	1	0	0	0	0	0	0	0	0	0	0	0	0	0	0	0	0	0	0	0	0	0	0	0	0	0
hsa-miR-4420#mv	0	0	0	0	0	0	0	0	0	0	0	0	1	0	0	0	0	0	0	0	0	0	0	0	0	0	0
hsa-miR-4425#Canonical_RC	0	0	0	0	0	0	0	0	0	0	0	0	0	13	0	0	0	0	0	0	0	0	0	0	0	0	0
hsa-miR-4426#lv3pE	0	0	0	0	0	0	0	0	0	0	0	0	6	0	0	0	0	0	0	0	0	0	0	0	0	0	0
hsa-miR-4429#NTA(G)	0	0	0	0	0	0	0	0	0	0	0	0	1	0	0	0	0	0	0	0	0	0	0	0	0	0	0
hsa-miR-4433a-5p#lv3pE	0	0	0	0	0	0	10	0	0	8	0	0	0	0	0	0	0	0	0	0	4	0	0	0	0	0	0
hsa-miR-4443#mv	0	0	0	0	0	0	0	0	0	0	0	0	0	0	0	0	0	0	0	0	0	0	1	0	0	0	0
hsa-miR-4449#mv	0	10	0	0	0	0	0	0	0	0	0	0	0	0	0	0	0	0	0	0	0	0	0	0	0	0	0
hsa-miR-4457#mv	0	0	0	0	0	0	0	0	0	0	22	0	0	0	0	0	0	0	0	0	0	0	0	0	0	0	0
hsa-miR-4460#mv	0	0	0	0	0	0	0	13	0	0	0	0	0	0	0	0	0	0	0	0	0	0	0	0	0	0	0
hsa-miR-4473#Canonical_RC	0	0	0	0	0	0	0	0	0	0	0	0	0	0	0	0	0	0	0	0	0	0	0	0	0	24	0
hsa-miR-4473#NTA(U)	0	0	0	0	0	0	0	0	0	0	17	0	0	0	0	0	0	0	0	0	0	0	0	0	0	0	0
hsa-miR-4477b#mv	0	0	0	0	0	0	0	0	0	0	0	0	0	0	0	0	0	0	0	0	15	0	0	0	0	0	0
hsa-miR-4482-5p#mv	15	0	0	0	0	7	0	0	0	0	0	0	0	15	0	0	0	0	0	0	0	0	0	0	0	0	0
hsa-miR-4485-3p#lv3pE	0	0	0	0	0	0	0	0	0	0	0	0	0	0	0	0	0	0	0	0	0	0	17	0	0	0	0
hsa-miR-4485-3p#lv3pT	0	15	0	0	0	0	0	0	0	0	0	0	0	0	0	0	0	0	0	0	0	0	0	0	0	0	0
hsa-miR-4485-3p#lv5pE	9	0	0	0	0	0	0	0	0	0	0	0	0	3	0	0	0	0	0	0	0	0	0	0	0	0	0
hsa-miR-4485-3p#lv5pT	0	0	0	0	13	0	0	0	0	0	13	0	0	0	0	0	0	0	0	0	0	0	0	0	0	0	0
hsa-miR-4485-3p#mv	21	17	0	42	7	16	43	8	24	82	0	0	0	8	0	25	0	36	0	0	0	0	74	6	0	37	10
hsa-miR-4485-3p#NTA(A)	1	18	0	0	0	0	24	0	4	0	0	0	0	1	0	0	0	0	1	0	0	0	2	0	0	0	0
hsa-miR-4485-3p#NTA(C)	0	0	0	0	14	25	0	23	19	0	0	0	0	0	0	0	0	11	0	0	0	0	0	0	0	0	0
hsa-miR-4488#Canonical_RC	0	12	0	0	8	0	0	0	0	0	0	0	0	8	0	0	0	0	0	0	0	0	0	0	0	0	0
hsa-miR-4488#lv3pT	0	6	0	0	0	0	0	0	0	0	0	0	3	0	0	0	0	6	0	4	0	0	0	0	0	0	0
hsa-miR-449a#Canonical_RC	17	0	0	0	0	0	0	0	0	0	0	15	0	0	0	0	0	0	0	0	0	0	0	0	0	0	0
hsa-miR-449c-5p#Canonical_RC	0	0	0	0	0	0	0	0	0	0	0	0	0	0	0	0	0	0	0	0	0	0	0	30	0	0	0
hsa-miR-449c-5p#lv3pT	29	0	0	0	0	0	0	0	0	0	0	0	0	0	0	0	0	0	0	0	0	0	0	0	0	0	0
hsa-miR-449c-5p#lv5pT	17	0	0	0	0	0	0	0	0	0	0	0	0	0	0	0	0	19	0	0	0	0	20	0	0	0	0
hsa-miR-449c-5p#mv	0	0	0	0	14	0	0	0	0	0	0	0	0	0	0	0	0	4	0	0	0	24	19	0	0	12	0
hsa-miR-449c-5p#NTA(A)	0	0	0	0	0	0	0	0	0	0	0	0	0	0	0	0	0	0	0	0	0	1	0	0	0	0	0
hsa-miR-450a-5p#lv3pT	0	14	0	0	0	0	0	0	13	0	0	0	0	0	0	0	0	3	0	0	0	0	0	17	0	0	0
hsa-miR-450b-5p#Canonical_RC	0	0	0	0	0	0	0	0	0	0	0	0	0	0	0	0	0	0	0	0	19	0	0	0	0	0	0
hsa-miR-450b-5p#lv3pE	0	0	0	0	0	0	0	0	0	0	0	0	0	0	0	0	0	0	0	0	0	0	0	12	0	0	0
hsa-miR-450b-5p#lv3pT	9	0	0	0	0	0	0	0	0	0	0	0	0	0	0	0	0	0	0	0	0	0	0	0	0	0	0
hsa-miR-4512#mv	0	0	0	0	0	0	0	0	0	0	0	0	0	0	13	0	0	0	0	0	0	0	0	0	0	0	0
hsa-miR-4521#lv3pE	0	0	0	0	0	0	0	0	0	0	0	0	0	0	0	0	0	0	0	0	0	0	21	0	0	0	0
hsa-miR-4521#mv	0	0	0	0	0	0	0	0	0	0	0	0	0	0	0	0	0	0	0	0	0	0	43	0	0	0	0
hsa-miR-454-5p#lv3pE	0	0	0	0	17	0	0	0	0	0	0	0	0	0	0	0	0	0	0	0	0	0	0	0	0	28	0
hsa-miR-455-5p#Canonical_RC	0	0	0	0	0	0	0	0	0	0	0	0	0	0	0	0	0	0	0	0	0	0	0	15	0	0	0
hsa-miR-455-5p#lv3pE	0	0	0	0	0	0	0	0	0	0	0	0	0	0	0	0	0	0	0	0	0	0	26	0	0	0	0
hsa-miR-455-5p#mv	0	0	0	0	0	0	12	0	0	0	0	0	0	0	0	0	0	0	0	0	0	0	0	0	0	0	0
hsa-miR-455-5p#NTA(A)	0	0	0	0	0	0	0	0	0	0	0	0	0	0	0	0	0	0	0	0	0	0	16	0	0	0	0
hsa-miR-455-5p#NTA(U)	0	0	0	0	0	0	0	0	0	0	0	0	0	0	0	0	0	0	0	0	0	0	1	0	0	0	0
hsa-miR-4650-5p#lv3pT	0	0	0	0	0	0	0	0	0	0	0	10	0	0	0	0	0	0	0	0	0	0	0	0	0	0	0
hsa-miR-4654#lv3pE	0	0	0	0	0	0	0	0	0	0	0	0	0	0	0	0	0	0	0	0	0	0	20	0	0	23	0
hsa-miR-4658#mv	0	19	0	0	0	0	0	0	0	0	0	0	0	0	0	0	0	0	0	0	0	0	0	0	0	0	0
hsa-miR-4659b-3p#NTA(A)	0	0	0	0	0	0	0	0	0	0	0	0	0	0	0	0	0	0	0	0	0	0	0	0	0	14	0
hsa-miR-4661-5p#Canonical_RC	0	0	0	0	0	0	0	0	0	0	0	0	0	0	0	0	0	0	0	0	0	0	0	4	0	0	0
hsa-miR-4661-5p#lv3pE	0	0	0	0	0	0	0	0	0	0	0	0	0	0	25	0	25	0	18	0	0	0	0	0	0	0	0
hsa-miR-4661-5p#lv3pT	12	0	0	0	0	0	0	0	0	18	0	0	0	0	0	0	0	0	19	0	0	0	0	0	0	0	0
hsa-miR-4661-5p#NTA(A)	0	0	0	0	0	0	0	0	18	0	0	0	0	12	19	0	0	0	40	0	0	0	0	0	0	0	0
hsa-miR-4661-5p#NTA(C)	0	0	0	0	0	0	0	0	0	0	6	0	0	0	0	18	0	0	0	0	0	0	0	0	0	0	0
hsa-miR-4664-3p#mv	0	0	0	0	0	0	0	0	19	0	0	0	0	0	0	0	0	0	0	0	0	0	0	0	0	0	0
hsa-miR-4684-5p#Canonical_RC	0	0	0	0	0	0	0	0	0	0	0	0	0	0	0	0	0	0	0	0	0	0	0	14	0	0	0
hsa-miR-4685-5p#mv	0	2	0	0	0	1	0	0	0	0	0	0	0	0	0	0	0	0	0	0	0	0	0	0	0	0	0
hsa-miR-4687-3p#lv5pE	0	0	0	0	0	0	0	0	0	0	0	0	0	0	0	0	0	0	0	0	0	0	0	0	8	0	0
hsa-miR-4687-3p#mv	0	0	0	0	0	0	0	0	0	0	0	0	0	0	0	0	0	0	0	0	0	0	17	0	0	0	0
hsa-miR-4705#Canonical_RC	0	0	0	0	0	0	0	0	0	0	13	18	0	0	0	0	0	0	0	0	0	0	0	0	0	0	0
hsa-miR-4705#lv3pT	0	0	0	0	0	0	0	0	0	0	0	0	27	0	0	0	0	0	0	0	0	0	0	0	0	0	0
hsa-miR-4721#lv3pT	0	0	9	0	0	0	0	0	0	0	0	0	0	0	0	0	0	0	0	0	0	0	0	0	0	0	0
hsa-miR-4727-5p#mv	0	0	0	0	1	0	0	0	0	0	0	0	0	0	0	0	0	0	0	0	0	0	0	0	0	0	0
hsa-miR-4745-5p#lv3pT	23	6	0	0	12	0	0	0	0	0	0	0	0	0	0	0	0	0	0	0	0	0	0	0	0	0	0
hsa-miR-4746-5p#lv3pT	0	0	0	0	0	0	0	0	0	0	0	0	0	0	0	0	0	0	0	0	0	0	0	0	21	0	0
hsa-miR-4775#Canonical_RC	0	28	0	0	0	0	0	0	0	0	0	0	0	0	11	0	0	36	10	13	0	17	0	0	0	0	0
hsa-miR-4775#NTA(A)	0	0	0	0	0	0	0	0	0	0	0	0	0	17	1	0	0	0	0	0	0	0	0	0	0	0	0
hsa-miR-4787-3p#NTA(A)	0	14	0	0	0	0	0	0	0	0	0	0	0	0	0	0	0	0	0	0	0	0	0	0	0	0	0
hsa-miR-4788#lv3pE	0	0	0	0	0	0	0	0	0	0	0	0	0	0	0	0	0	0	0	0	0	16	0	0	0	0	0
hsa-miR-4797-5p#mv	0	0	0	0	0	0	0	0	0	0	0	0	0	0	0	0	0	0	0	0	0	0	0	0	0	18	0
hsa-miR-4798-5p#Canonical_RC	0	0	0	0	0	0	0	0	0	0	0	0	0	0	0	0	0	13	0	0	0	0	0	0	0	0	0
hsa-miR-4800-3p#mv	0	0	0	0	0	0	0	0	0	0	0	0	0	0	0	0	0	0	0	0	9	0	0	0	0	0	0
hsa-miR-483-3p#lv3pE	0	0	0	0	0	0	0	0	0	0	0	0	0	0	0	0	0	0	0	0	0	0	0	0	0	16	14
hsa-miR-483-3p#NTA(A)	0	0	0	0	0	0	0	0	0	0	0	0	0	0	15	0	0	0	0	0	0	0	0	0	0	0	0
hsa-miR-483-3p#NTA(C)	0	0	0	0	0	0	0	0	0	0	0	0	0	0	0	0	0	0	0	0	23	0	0	0	0	0	0
hsa-miR-484#lv5pT	0	0	0	0	16	0	0	0	0	0	0	0	0	0	0	0	0	0	0	0	0	0	0	0	0	0	0
hsa-miR-484#NTA(A)	0	0	0	0	0	0	0	0	11	0	0	0	0	0	0	0	0	0	0	0	0	0	0	0	0	0	0
hsa-miR-484#NTA(U)	0	0	1	0	0	0	0	0	0	0	0	0	0	0	0	0	0	0	0	0	0	0	0	0	0	0	0
hsa-miR-485-3p#lv3pE	0	0	15	0	0	0	0	0	0	0	0	0	0	0	0	0	0	0	0	0	0	0	0	0	0	0	0
hsa-miR-485-3p#NTA(A)	0	0	0	0	0	0	0	0	0	0	0	0	0	0	0	0	0	0	0	0	0	0	25	0	0	0	0
hsa-miR-493-3p#Canonical_RC	0	0	0	0	0	0	0	0	0	0	0	0	0	0	0	0	0	33	0	0	0	0	0	19	0	14	0
hsa-miR-497-5p#Canonical_RC	0	0	0	0	0	0	0	0	0	25	0	0	0	0	0	0	0	0	0	0	0	0	0	0	0	0	0
hsa-miR-497-5p#mv	0	0	0	0	0	0	0	0	0	0	21	0	0	0	0	0	0	0	0	0	0	0	0	0	0	0	0
hsa-miR-4999-5p#lv3pE	0	0	0	0	0	0	0	0	0	0	0	0	0	0	0	4	0	0	0	0	0	0	0	0	0	0	0
hsa-miR-4999-5p#NTA(C)	0	0	0	0	0	0	0	0	0	0	0	0	10	0	0	0	0	0	0	0	0	0	0	0	0	0	0
hsa-miR-4999-5p#NTA(U)	0	0	0	0	0	0	0	0	0	0	0	0	0	12	0	0	0	0	0	0	0	0	0	0	0	0	0
hsa-miR-499a-5p#Canonical_RC	0	0	0	0	0	0	17	0	0	0	0	0	0	1	0	0	21	0	0	0	0	0	0	0	20	0	19
hsa-miR-499a-5p#lv3pE	31	63	0	0	11	0	20	0	15	0	19	26	0	35	0	0	20	68	0	16	0	0	0	0	0	0	0
hsa-miR-499a-5p#lv3pT	0	0	0	12	0	0	0	9	0	51	10	0	0	16	0	16	14	20	0	35	0	0	0	0	0	0	0
hsa-miR-499a-5p#lv5pT	0	0	0	0	0	0	0	0	0	0	0	0	0	0	25	0	0	0	0	0	0	0	0	0	0	0	0
hsa-miR-499a-5p#mv	17	0	0	13	0	0	16	10	0	0	0	0	0	0	0	27	0	0	0	0	0	0	30	0	0	0	0
hsa-miR-499a-5p#NTA(U)	0	0	0	0	0	0	0	0	0	0	0	0	10	0	0	0	0	25	0	0	0	0	0	0	0	0	0
hsa-miR-5001-5p#mv	0	0	0	0	0	0	0	0	0	0	0	0	0	0	0	0	0	0	0	0	0	0	1	0	0	0	0
hsa-miR-5002-3p#lv3pT	0	0	0	0	1	0	0	0	0	0	0	0	0	0	0	0	0	0	0	0	0	0	0	0	0	0	0
hsa-miR-500a-3p#lv3pT	0	0	0	0	0	0	0	0	0	0	0	0	0	0	0	0	0	17	0	0	0	0	0	0	0	0	0
hsa-miR-500a-3p#mv	0	0	0	0	0	0	0	0	0	27	0	0	18	0	22	0	7	0	0	0	0	0	0	38	0	0	0
hsa-miR-500a-3p#NTA(A)	0	0	0	0	0	0	0	0	0	1	0	0	15	0	0	0	0	0	0	0	0	0	0	0	0	0	0
hsa-miR-500a-3p#NTA(C)	0	0	0	16	0	0	17	0	28	0	21	0	13	0	0	0	31	40	0	0	33	0	1	0	35	0	0
hsa-miR-500a-3p#NTA(U)	33	0	0	0	0	0	0	0	0	0	0	0	0	0	0	0	22	0	0	0	0	0	0	0	0	0	0
hsa-miR-500b-3p#lv5pE	0	0	0	0	0	0	0	0	0	0	0	0	0	0	0	0	0	0	0	0	0	0	7	0	0	0	0
hsa-miR-500b-3p#mv	0	27	0	0	0	0	0	0	0	0	0	0	4	0	0	0	0	0	0	0	0	0	0	0	0	0	0
hsa-miR-500b-3p#NTA(C)	0	0	0	0	0	0	0	0	0	0	0	0	0	0	0	0	0	1	0	0	0	0	0	0	0	0	0
hsa-miR-501-3p#Canonical_RC	0	14	0	0	0	0	8	0	0	0	0	0	4	0	0	0	0	0	0	0	0	0	13	0	0	0	17
hsa-miR-501-3p#lv3pT	0	0	0	0	0	0	15	0	0	0	0	23	0	0	19	0	0	0	0	0	0	0	0	0	0	0	0
hsa-miR-501-3p#NTA(A)	0	1	0	0	0	0	12	0	0	0	0	0	0	0	0	0	0	0	0	0	0	0	0	0	0	27	1
hsa-miR-501-3p#NTA(C)	0	0	0	0	0	0	0	0	0	20	0	15	0	13	0	0	13	16	0	0	0	0	31	0	0	20	0
hsa-miR-501-5p#lv3pE	0	0	0	0	0	0	0	0	10	0	0	0	0	0	0	0	0	0	0	0	0	0	0	0	0	0	0
hsa-miR-5010-3p#NTA(G)	0	0	0	0	0	0	0	0	6	0	0	0	0	0	0	0	0	0	0	0	0	0	0	0	0	0	0
hsa-miR-5011-3p#lv3pT	0	0	0	0	0	0	0	0	17	14	0	0	0	0	8	0	0	0	8	0	0	0	0	0	0	0	0
hsa-miR-5011-5p#NTA(A)	0	0	14	0	0	0	0	0	0	0	0	0	0	0	0	0	0	0	0	0	0	0	0	0	0	0	0
hsa-miR-502-3p#Canonical_RC	10	0	0	0	0	0	0	0	0	14	0	26	16	44	0	0	17	75	0	0	0	18	0	0	0	14	0
hsa-miR-502-3p#lv3pE	0	21	0	0	0	0	0	0	0	0	0	0	0	0	0	0	0	0	0	0	0	0	0	0	0	0	0
hsa-miR-502-3p#lv3pT	0	0	0	0	0	0	0	0	0	27	0	0	17	0	22	0	7	0	0	0	0	0	0	38	0	0	0
hsa-miR-502-3p#NTA(A)	0	0	0	0	0	0	0	0	0	1	0	0	0	0	0	0	0	1	0	0	0	0	0	0	0	0	0
hsa-miR-502-3p#NTA(C)	0	0	0	16	0	0	17	0	28	0	21	0	13	0	0	0	31	40	0	0	33	0	1	0	35	0	0
hsa-miR-503-5p#lv3pT	0	0	0	0	0	0	0	0	0	0	0	0	0	0	0	0	0	0	14	0	0	0	0	0	0	0	0
hsa-miR-503-5p#NTA(A)	0	0	0	0	0	0	0	0	0	0	0	0	0	16	0	0	0	0	0	0	0	0	0	0	0	0	0
hsa-miR-504-5p#lv5pT	0	0	0	0	0	0	0	0	0	0	0	0	26	12	0	0	0	0	16	0	0	0	0	0	0	0	0
hsa-miR-504-5p#mv	0	0	16	0	0	0	21	0	0	0	0	0	0	0	0	0	0	25	0	0	0	0	0	0	0	0	0
hsa-miR-505-3p#mv	0	0	0	0	0	0	0	0	0	0	17	0	0	0	0	0	0	0	0	0	0	0	0	0	0	0	0
hsa-miR-506-3p#lv5pE	0	0	0	14	12	0	72	17	7	25	17	49	0	0	26	27	21	0	0	0	25	0	0	38	0	0	0
hsa-miR-506-5p#lv3pT	0	0	0	0	0	0	0	0	18	0	0	0	0	0	0	0	0	16	0	0	0	0	0	0	0	0	0
hsa-miR-508-3p#Canonical_RC	163	56	0	37	26	33	71	0	49	48	26	104	76	98	14	0	60	166	44	11	0	0	127	34	0	0	0
hsa-miR-508-3p#lv3pT	128	75	35	11	43	52	97	52	85	98	0	81	156	147	111	116	51	402	76	35	94	1	282	25	15	49	41
hsa-miR-508-3p#lv5pT	51	0	0	0	9	0	0	0	13	0	0	0	0	0	16	0	0	50	9	0	0	0	19	21	11	0	0
hsa-miR-508-3p#mv	10	0	0	0	0	0	0	0	0	0	0	0	0	0	0	0	0	0	15	0	0	0	24	0	0	0	0
hsa-miR-508-3p#NTA(A)	0	0	0	0	0	0	20	0	0	7	0	0	60	19	25	16	0	76	15	11	13	0	114	20	0	0	0
hsa-miR-508-3p#NTA(C)	0	0	0	1	0	0	0	0	0	22	0	0	0	0	0	0	0	21	0	0	0	0	16	0	0	0	0
hsa-miR-508-3p#NTA(U)	12	10	0	15	0	0	0	0	18	19	0	10	0	23	0	0	0	41	23	0	0	0	17	0	0	23	0
hsa-miR-508-5p#Canonical_RC	14	0	0	0	0	0	0	0	0	0	0	0	15	16	0	0	0	0	0	0	0	0	21	11	0	0	0
hsa-miR-508-5p#lv3pE	0	0	0	0	0	0	0	0	0	0	0	0	0	0	0	0	0	0	0	0	0	0	14	0	0	0	0
hsa-miR-508-5p#lv3pT	0	0	0	0	0	0	16	0	0	0	0	0	0	0	0	0	0	0	0	0	0	0	11	29	0	0	0
hsa-miR-508-5p#NTA(A)	0	0	9	0	0	0	0	0	0	0	0	0	13	17	0	0	0	24	0	0	0	0	13	18	0	0	0
hsa-miR-509-3-5p#Canonical_RC	328	103	59	32	210	46	383	9	115	83	144	226	171	246	138	193	232	291	100	85	78	21	308	53	25	31	96
hsa-miR-509-3-5p#lv3pE	10	27	15	0	0	0	0	0	13	22	0	20	0	0	23	0	26	1	2	0	0	0	2	0	0	0	0
hsa-miR-509-3-5p#lv3pT	779	261	83	145	323	89	1004	65	412	388	399	502	352	561	417	252	634	756	403	275	145	177	1080	101	201	166	167
hsa-miR-509-3-5p#NTA(A)	2	29	12	0	0	0	127	0	0	60	49	158	295	420	719	450	527	850	539	381	267	309	1889	101	195	204	175
hsa-miR-509-3-5p#NTA(C)	0	0	0	0	0	0	0	0	1	0	0	0	0	0	0	0	1	0	23	0	0	0	50	0	0	0	11
hsa-miR-509-3-5p#NTA(G)	1	0	0	0	0	0	0	0	6	0	0	0	16	0	0	0	25	26	12	43	11	0	115	1	0	0	0
hsa-miR-509-3-5p#NTA(U)	2	1	0	0	0	0	27	0	0	0	12	15	0	25	45	0	19	36	0	0	0	0	2	0	0	0	0
hsa-miR-509-3p#Canonical_RC	52	17	0	0	0	0	15	0	0	16	12	12	12	9	0	0	0	13	0	0	0	0	8	0	0	18	0
hsa-miR-509-3p#lv3pE	18	0	0	0	0	23	0	0	0	16	0	9	0	0	17	0	0	0	0	0	0	0	0	0	0	0	49
hsa-miR-509-3p#lv3pT	16	0	0	30	0	0	17	0	12	26	17	0	0	0	0	0	2	5	0	0	8	0	9	0	0	0	0
hsa-miR-509-3p#mv	0	0	0	0	0	0	0	0	0	0	0	0	0	0	0	0	0	18	0	0	0	0	0	0	0	0	0
hsa-miR-509-3p#NTA(A)	0	0	0	0	0	0	37	0	0	0	0	0	49	101	87	0	30	11	17	5	9	0	64	23	19	11	0
hsa-miR-509-3p#NTA(G)	0	0	0	0	0	0	0	0	0	0	0	0	9	0	0	0	0	0	0	0	0	0	0	0	0	0	0
hsa-miR-509-3p#NTA(U)	14	0	5	0	0	0	0	0	0	0	0	12	0	0	0	0	0	6	12	0	0	0	1	40	0	0	0
hsa-miR-509-5p#lv3pE	21	17	0	20	0	0	0	0	0	52	19	26	0	0	0	0	16	0	0	0	0	0	0	0	0	0	0
hsa-miR-5094#mv	0	0	0	0	0	1	0	0	0	0	1	0	0	0	0	0	0	0	0	0	0	0	0	0	0	0	0
hsa-miR-5100#mv	6	0	14	0	0	0	27	8	10	14	0	0	15	22	15	27	18	90	0	0	17	24	10	0	26	31	6
hsa-miR-511-5p#lv3pE	0	0	0	0	0	0	0	0	0	0	0	0	0	0	0	0	0	0	0	0	0	0	0	0	0	14	0
hsa-miR-511-5p#lv5pE	0	0	0	0	0	0	0	0	0	0	0	0	0	0	0	0	0	0	0	0	0	0	9	0	0	0	0
hsa-miR-511-5p#NTA(A)	0	0	0	0	0	0	0	0	0	0	0	0	0	0	0	0	0	15	0	0	0	0	0	0	0	0	0
hsa-miR-512-3p#Canonical_RC	7	0	14	25	12	0	13	0	0	0	0	20	0	22	0	0	0	14	31	16	22	0	189	15	82	1	0
hsa-miR-512-3p#lv3pE	0	0	0	0	0	0	0	0	0	0	0	0	0	0	0	0	0	0	0	0	0	0	15	0	0	0	0
hsa-miR-512-3p#lv3pT	0	0	0	0	0	0	0	0	23	10	6	0	15	0	0	0	0	0	14	0	0	0	8	0	0	0	0
hsa-miR-512-3p#NTA(A)	0	13	0	0	0	0	0	0	17	0	0	0	0	26	0	0	19	0	0	0	0	0	0	0	0	19	0
hsa-miR-512-3p#NTA(G)	0	17	0	0	0	0	0	0	0	0	0	0	0	0	0	0	0	0	0	0	0	0	0	0	0	0	0
hsa-miR-512-3p#NTA(U)	0	0	0	0	0	0	0	0	0	0	0	0	0	0	0	0	0	1	0	0	0	0	0	0	0	0	0
hsa-miR-513b-5p#lv3pT	0	0	0	0	0	1	0	0	0	0	0	0	0	0	0	0	0	0	0	0	0	0	0	0	0	0	0
hsa-miR-513b-5p#NTA(A)	0	0	0	0	0	0	0	0	0	0	0	0	0	0	0	0	0	1	0	0	0	0	26	0	0	0	0
hsa-miR-513c-5p#Canonical_RC	10	18	0	0	4	0	0	0	0	15	0	0	0	15	0	0	37	0	20	0	0	0	29	27	0	0	0
hsa-miR-513c-5p#lv3pE	0	0	0	0	0	0	0	0	0	0	0	0	15	0	0	0	0	0	0	0	0	0	0	0	0	0	0
hsa-miR-513c-5p#lv3pT	0	0	0	0	0	13	19	0	9	0	0	0	0	0	0	0	0	15	0	0	0	0	0	0	0	0	0
hsa-miR-513c-5p#NTA(A)	0	16	0	0	0	0	0	0	0	0	0	0	0	0	25	0	0	24	0	0	0	0	0	0	0	0	0
hsa-miR-514a-3p#Canonical_RC	209	159	305	674	474	327	1769	107	585	782	509	601	114	54	619	558	719	404	80	375	238	110	355	72	87	255	294
hsa-miR-514a-3p#lv3pT	0	0	0	0	21	0	0	0	0	1	0	14	0	16	0	0	0	0	0	0	0	0	0	0	0	0	11
hsa-miR-514a-3p#lv5pE	69	12	27	35	197	92	82	16	68	178	93	167	17	17	121	35	88	16	21	0	31	12	0	23	0	41	32
hsa-miR-514a-3p#mv	0	0	0	0	0	0	17	0	0	25	0	0	0	0	0	0	0	20	0	0	0	0	0	0	0	0	0
hsa-miR-514a-3p#NTA(A)	0	0	0	0	12	0	0	0	15	0	0	0	0	0	0	0	15	0	0	0	0	0	58	0	0	0	0
hsa-miR-514a-3p#NTA(C)	0	0	0	0	0	0	1	0	0	0	0	0	0	0	0	0	0	0	1	0	0	0	0	1	0	0	0
hsa-miR-514a-3p#NTA(G)	0	0	0	0	0	0	0	0	0	1	0	0	0	0	0	0	0	0	0	1	0	0	0	0	0	0	0
hsa-miR-514a-3p#NTA(U)	0	0	1	0	0	0	0	0	0	0	0	0	0	0	1	0	0	0	0	0	0	0	0	0	0	0	0
hsa-miR-514a-5p#Canonical_RC	0	0	0	0	0	0	0	0	13	0	0	0	0	0	16	0	0	0	0	0	0	0	21	0	0	0	19
hsa-miR-514a-5p#NTA(C)	0	0	0	0	0	0	0	7	0	0	0	0	0	0	0	0	0	0	0	0	0	0	0	0	0	0	0
hsa-miR-515-3p#mv	0	0	0	0	0	0	12	0	0	0	0	0	0	0	0	0	0	0	0	0	0	0	0	0	0	0	0
hsa-miR-515-3p#NTA(A)	0	0	0	0	0	0	0	0	0	0	0	0	0	0	0	22	0	0	0	0	0	0	0	0	0	0	0
hsa-miR-515-5p#Canonical_RC	11	0	0	0	0	0	0	0	0	0	0	0	0	0	0	0	0	0	0	0	0	0	0	0	0	0	0
hsa-miR-515-5p#lv3pE	0	20	0	0	0	0	0	0	0	0	0	0	0	0	0	0	0	0	0	0	0	0	0	0	0	0	0
hsa-miR-515-5p#NTA(A)	0	0	0	0	0	0	0	0	0	0	0	0	0	28	0	0	0	0	0	0	0	0	0	0	0	0	0
hsa-miR-516a-5p#Canonical_RC	0	0	0	0	0	0	12	0	0	0	0	0	0	0	0	0	17	0	0	0	0	0	0	0	0	0	0
hsa-miR-516a-5p#lv3pE	0	0	0	15	0	0	0	0	0	0	0	0	0	0	0	0	0	0	0	0	0	0	0	0	0	0	18
hsa-miR-516a-5p#lv3pT	8	17	20	0	0	0	0	0	31	0	0	0	8	14	0	0	9	26	0	0	16	0	21	11	0	0	0
hsa-miR-516a-5p#NTA(A)	0	0	0	0	0	0	0	0	0	0	0	0	0	10	0	0	0	0	0	0	0	0	0	0	0	0	0
hsa-miR-516a-5p#NTA(G)	0	0	0	0	0	0	0	0	0	0	0	0	12	0	0	13	10	0	0	0	0	0	0	0	0	0	0
hsa-miR-516b-5p#Canonical_RC	268	152	141	271	183	223	374	77	195	239	402	197	57	95	152	110	92	360	278	148	116	75	417	28	39	149	293
hsa-miR-516b-5p#lv3pE	42	21	17	24	22	23	29	21	18	0	65	21	11	23	0	18	38	55	1	0	9	8	1	47	32	20	24
hsa-miR-516b-5p#lv3pT	79	36	0	35	56	0	126	15	81	9	22	19	0	17	0	26	11	83	47	0	10	0	6	18	0	0	0
hsa-miR-516b-5p#lv5pE	0	0	0	0	0	0	15	0	0	0	0	0	0	0	0	0	0	0	0	16	0	0	21	0	0	36	23
hsa-miR-516b-5p#mv	0	0	0	0	0	0	0	0	0	0	0	0	0	0	0	0	0	0	57	21	0	0	283	0	0	0	0
hsa-miR-516b-5p#NTA(A)	10	25	0	15	0	0	103	0	36	57	64	80	48	1	19	57	78	228	56	35	38	13	107	35	0	28	69
hsa-miR-516b-5p#NTA(C)	0	0	0	0	0	0	0	0	0	0	0	0	0	0	0	0	0	0	0	0	0	0	0	0	0	0	1
hsa-miR-516b-5p#NTA(G)	0	0	0	0	0	0	0	0	0	0	0	0	0	0	0	0	16	0	0	13	0	0	0	0	0	0	0
hsa-miR-516b-5p#NTA(U)	23	0	0	0	0	0	0	0	7	0	0	0	0	0	0	0	0	0	0	0	0	0	0	0	0	15	0
hsa-miR-517-5p#Canonical_RC	0	0	0	0	0	0	0	0	0	0	0	0	0	0	0	0	0	0	0	0	0	16	0	0	0	0	0
hsa-miR-517a-3p#Canonical_RC	15	0	0	20	17	0	37	0	0	0	0	0	0	0	0	0	0	0	0	0	0	0	30	0	0	0	21
hsa-miR-517a-3p#lv3pT	0	0	0	0	0	0	20	12	0	0	0	0	1	0	0	32	11	0	0	0	0	0	0	0	0	0	0
hsa-miR-517a-3p#NTA(A)	0	0	0	0	0	0	0	0	0	21	0	0	0	0	0	0	0	0	23	0	0	0	0	0	0	0	0
hsa-miR-517b-3p#Canonical_RC	15	0	0	20	17	0	37	0	0	0	0	0	0	0	0	0	0	0	0	0	0	0	30	0	0	0	21
hsa-miR-517b-3p#lv3pT	0	0	0	0	0	0	20	12	0	0	0	0	1	0	0	32	11	0	0	0	0	0	0	0	0	0	0
hsa-miR-517b-3p#NTA(A)	0	0	0	0	0	0	0	0	0	21	0	0	0	0	0	0	0	0	23	0	0	0	0	0	0	0	0
hsa-miR-517c-3p#lv3pT	0	0	0	0	18	0	0	0	0	0	0	0	0	0	0	0	0	0	0	0	0	0	0	0	0	0	0
hsa-miR-518a-3p#Canonical_RC	0	0	0	0	0	0	0	0	0	0	0	0	13	0	0	0	0	0	0	0	0	0	0	0	0	0	0
hsa-miR-518a-3p#mv	0	0	0	0	0	0	0	0	0	0	0	0	0	0	0	0	0	0	0	0	0	0	17	0	0	0	0
hsa-miR-518b#Canonical_RC	0	0	0	0	0	0	14	0	0	0	0	20	0	0	0	0	0	0	0	0	18	20	17	0	0	0	0
hsa-miR-518b#lv3pE	0	0	0	0	0	0	0	0	0	0	0	0	0	0	0	0	0	0	0	0	0	0	0	18	0	0	0
hsa-miR-518b#lv3pT	0	0	0	0	0	0	0	0	0	0	0	20	0	0	0	19	0	0	0	0	0	0	0	0	0	0	0
hsa-miR-518c-3p#lv3pT	0	0	0	0	0	0	11	0	0	0	16	0	0	0	54	0	0	0	0	12	13	0	20	0	0	0	23
hsa-miR-518c-3p#NTA(A)	0	0	0	0	0	0	0	0	0	0	0	0	0	0	27	0	0	0	0	0	0	0	0	0	0	0	0
hsa-miR-518c-5p#lv3pT	0	0	0	0	0	0	0	0	0	0	0	0	13	0	0	0	0	0	0	0	0	0	0	0	0	0	0
hsa-miR-518c-5p#lv5pT	0	0	0	0	0	0	0	0	0	0	0	0	0	0	0	0	0	15	0	0	0	0	0	0	0	0	0
hsa-miR-518c-5p#mv	0	0	0	0	0	0	0	0	0	0	0	0	0	0	0	0	0	0	0	0	0	0	0	0	23	0	0
hsa-miR-518d-5p#Canonical_RC	0	0	0	0	0	0	0	0	0	0	0	0	0	0	0	0	0	23	0	0	0	0	0	0	0	0	0
hsa-miR-518d-5p#lv3pT	14	0	0	16	0	0	0	0	0	37	1	0	0	0	28	0	0	0	0	0	0	0	24	0	0	0	20
hsa-miR-518d-5p#NTA(A)	0	0	0	0	0	0	0	0	0	0	0	0	1	0	1	0	0	0	0	0	0	0	21	0	0	0	0
hsa-miR-518e-5p#Canonical_RC	0	0	0	16	0	0	0	10	0	0	0	0	0	0	0	0	0	0	0	0	9	17	34	14	0	19	0
hsa-miR-518e-5p#lv3pE	0	0	0	0	0	0	16	0	0	0	0	6	0	0	0	21	0	0	0	0	0	0	0	0	0	0	0
hsa-miR-518e-5p#lv3pT	0	0	0	11	0	0	16	0	0	20	15	13	0	0	0	0	31	0	0	13	17	0	21	0	16	14	0
hsa-miR-518e-5p#mv	0	0	0	0	0	1	0	0	0	0	0	0	0	0	0	1	0	0	0	0	0	0	0	0	0	0	0
hsa-miR-518e-5p#NTA(A)	0	0	0	0	0	0	0	0	0	0	0	0	0	0	0	0	0	17	0	0	0	0	32	0	0	14	20
hsa-miR-518f-5p#Canonical_RC	0	0	0	0	0	0	0	0	0	0	0	0	0	0	0	0	0	0	0	0	0	0	0	0	24	0	0
hsa-miR-518f-5p#lv3pT	14	0	0	16	0	0	0	0	0	37	1	0	0	0	28	0	0	0	0	0	0	0	24	0	0	0	20
hsa-miR-518f-5p#NTA(A)	0	0	0	0	0	0	0	0	0	0	0	0	0	0	18	0	0	0	0	0	0	0	21	0	0	0	0
hsa-miR-519a-2-5p#mv	0	0	0	0	0	0	0	0	0	0	0	0	0	0	0	0	1	0	0	0	0	0	0	0	0	0	0
hsa-miR-519a-3p#Canonical_RC	18	0	0	0	0	0	0	0	0	0	0	0	0	0	0	0	0	20	0	0	0	0	21	0	0	0	0
hsa-miR-519a-3p#lv3pT	0	0	0	0	1	0	13	0	0	0	0	0	0	0	0	0	0	0	0	0	0	0	0	0	0	0	0
hsa-miR-519a-5p#Canonical_RC	0	0	0	16	0	0	0	10	0	0	0	0	0	0	0	0	0	0	0	0	9	17	34	14	0	19	0
hsa-miR-519a-5p#lv3pE	0	0	0	0	0	0	16	0	0	0	0	6	0	0	0	21	0	0	0	0	0	0	0	0	0	0	0
hsa-miR-519a-5p#lv3pT	0	0	0	11	0	0	16	0	0	20	15	13	0	0	0	0	31	0	0	13	17	0	21	0	16	14	0
hsa-miR-519a-5p#mv	0	0	0	0	0	13	0	0	0	17	3	0	7	0	0	29	0	0	0	0	0	0	0	0	0	0	0
hsa-miR-519a-5p#NTA(A)	0	0	0	0	0	0	0	0	0	0	0	0	0	0	0	0	0	17	0	0	0	0	32	0	0	14	20
hsa-miR-519b-5p#Canonical_RC	0	0	0	16	0	0	0	10	0	0	0	0	0	0	0	0	0	0	0	0	9	17	34	14	0	19	0
hsa-miR-519b-5p#lv3pE	0	0	0	0	0	0	16	0	0	0	0	6	0	0	0	21	0	0	0	0	0	0	0	0	0	0	0
hsa-miR-519b-5p#lv3pT	0	0	0	11	0	0	16	0	0	20	15	13	0	0	0	0	31	0	0	13	17	0	21	0	16	14	0
hsa-miR-519b-5p#mv	0	0	0	0	0	1	0	0	0	0	0	0	0	0	0	1	0	0	0	0	0	0	0	0	0	0	0
hsa-miR-519b-5p#NTA(A)	0	0	0	0	0	0	0	0	0	0	0	0	0	0	0	0	0	17	0	0	0	0	32	0	0	14	20
hsa-miR-519c-5p#Canonical_RC	0	0	0	16	0	0	0	10	0	0	0	0	0	0	0	0	0	0	0	0	9	17	34	14	0	19	0
hsa-miR-519c-5p#lv3pE	0	0	0	0	0	0	16	0	0	0	0	6	0	0	0	21	0	0	0	0	0	0	0	0	0	0	0
hsa-miR-519c-5p#lv3pT	0	0	0	11	0	0	16	0	0	20	15	13	0	0	0	0	31	0	0	13	17	0	21	0	16	14	0
hsa-miR-519c-5p#mv	0	0	0	0	0	1	0	0	0	0	0	0	0	0	0	1	0	0	0	0	0	0	0	0	0	0	0
hsa-miR-519c-5p#NTA(A)	0	0	0	0	0	0	0	0	0	0	0	0	0	0	0	0	0	17	0	0	0	0	32	0	0	14	20
hsa-miR-519d-3p#Canonical_RC	0	0	0	0	0	0	0	0	0	0	18	0	0	0	0	0	0	0	0	0	0	0	0	0	0	0	0
hsa-miR-519d-3p#lv3pE	0	19	0	0	0	0	15	0	0	0	23	0	0	0	0	0	0	0	0	23	0	0	39	0	0	0	0
hsa-miR-519d-3p#lv3pT	0	0	0	0	0	0	0	0	0	0	0	0	0	0	0	0	0	0	0	0	0	0	0	0	0	28	0
hsa-miR-519d-3p#mv	0	0	0	0	0	0	0	0	14	0	0	0	0	0	0	0	0	0	0	0	0	0	0	0	0	0	0
hsa-miR-519d-3p#NTA(A)	0	0	0	0	0	0	0	0	0	0	0	0	0	0	0	0	0	0	0	0	0	0	33	0	0	0	0
hsa-miR-519d-3p#NTA(U)	0	0	0	0	0	0	0	0	1	0	0	0	0	0	0	0	0	0	0	0	0	0	0	0	0	0	0
hsa-miR-519e-3p#mv	0	0	0	0	0	0	0	0	0	0	1	0	0	0	0	0	0	0	0	0	0	0	0	0	0	0	0
hsa-miR-520a-3p#Canonical_RC	0	0	0	0	0	0	0	0	0	0	0	0	0	0	0	0	0	19	0	0	0	0	0	0	0	0	0
hsa-miR-520a-3p#lv3pT	0	0	0	0	12	0	30	0	0	0	0	16	14	41	19	0	0	0	21	22	0	0	153	16	0	0	0
hsa-miR-520a-3p#mv	11	0	0	0	0	0	0	0	0	0	0	0	0	0	0	0	0	0	0	0	0	0	0	0	0	0	0
hsa-miR-520a-3p#NTA(A)	0	0	0	0	0	0	0	0	0	0	0	0	0	27	0	26	0	22	0	10	17	0	0	0	0	0	0
hsa-miR-520a-3p#NTA(G)	0	0	0	0	0	0	0	0	0	0	0	0	0	0	0	0	0	23	0	0	0	0	1	0	0	0	0
hsa-miR-520a-5p#Canonical_RC	0	0	0	1	0	0	0	0	0	0	0	0	0	0	0	0	0	0	0	0	18	0	18	0	0	0	0
hsa-miR-520a-5p#lv3pT	0	0	0	0	0	0	0	0	0	0	0	0	0	0	0	0	0	0	0	12	0	0	0	0	0	0	0
hsa-miR-520a-5p#NTA(A)	0	0	0	0	0	0	0	0	0	0	0	0	0	19	0	0	0	0	0	0	0	0	1	0	0	0	0
hsa-miR-520b-3p#Canonical_RC	0	0	0	16	0	0	0	0	0	0	0	0	0	0	0	0	0	0	0	0	0	0	0	0	0	0	0
hsa-miR-520b-5p#mv	0	0	0	0	0	0	0	0	0	0	0	0	0	0	0	0	1	0	0	0	0	0	0	0	0	0	0
hsa-miR-520c-3p#lv3pT	0	0	0	18	0	0	0	0	0	0	0	0	0	0	0	0	0	0	0	0	0	0	0	0	0	0	0
hsa-miR-520c-5p#Canonical_RC	0	0	0	0	0	0	0	0	0	0	0	0	0	0	0	0	0	23	0	0	0	0	0	0	0	0	0
hsa-miR-520c-5p#lv3pT	14	0	0	16	0	0	0	0	0	37	1	0	0	0	28	0	0	0	0	0	0	0	24	0	0	0	20
hsa-miR-520c-5p#NTA(A)	0	0	0	0	0	0	0	0	0	0	0	0	1	0	1	0	0	0	0	0	0	0	21	0	0	0	0
hsa-miR-520d-3p#mv	0	0	0	0	0	0	0	2	0	0	0	0	0	0	0	0	0	0	0	0	0	0	0	0	0	0	0
hsa-miR-520d-5p#mv	0	0	0	0	0	0	0	0	0	0	0	0	0	0	0	0	0	28	0	0	0	0	0	0	0	0	0
hsa-miR-520e-5p#mv	0	0	0	0	0	0	0	0	0	0	0	0	0	0	0	0	0	0	0	0	0	0	0	0	16	0	0
hsa-miR-520f-3p#lv5pE	0	0	0	0	0	8	0	0	0	0	0	0	0	0	0	0	0	0	0	0	0	0	0	0	0	0	0
hsa-miR-520f-3p#mv	0	0	16	58	20	35	15	0	0	0	11	0	27	0	0	16	0	0	0	0	16	0	109	0	19	0	0
hsa-miR-520f-3p#NTA(A)	0	0	0	0	0	28	25	0	0	0	0	0	0	0	0	0	0	0	0	0	0	14	2	0	0	0	0
hsa-miR-520f-3p#NTA(U)	0	0	0	0	0	0	0	0	0	0	0	0	0	0	0	0	0	0	0	0	0	0	1	0	0	0	0
hsa-miR-520g-3p#Canonical_RC	0	0	0	0	0	0	22	0	0	0	0	0	0	0	31	0	0	0	0	0	0	0	0	0	0	0	0
hsa-miR-520g-3p#lv5pT	0	0	0	0	0	0	0	0	0	0	0	0	0	0	0	0	0	0	0	0	0	0	26	33	0	0	0
hsa-miR-520g-3p#mv	0	0	14	0	0	0	0	0	0	0	0	0	0	0	0	0	0	0	0	0	0	0	1	0	0	0	0
hsa-miR-520g-5p#lv3pT	0	0	0	0	0	0	0	0	0	0	0	0	0	1	0	0	0	0	0	0	0	0	0	0	0	0	0
hsa-miR-520g-5p#lv5pE	0	0	0	0	0	0	0	0	0	0	0	0	0	0	0	0	0	0	0	0	10	0	0	0	0	0	0
hsa-miR-520g-5p#mv	0	0	0	0	0	0	0	0	0	0	0	0	0	0	0	18	0	0	0	0	0	44	0	0	0	0	10
hsa-miR-520g-5p#NTA(A)	0	0	0	0	0	0	0	0	0	0	0	0	0	0	0	0	0	0	0	0	0	1	0	0	0	0	0
hsa-miR-522-3p#Canonical_RC	10	0	0	0	0	0	0	0	0	0	15	0	0	0	0	0	0	0	0	0	0	0	15	0	0	0	0
hsa-miR-522-3p#lv3pT	0	0	0	0	0	0	0	0	8	21	0	0	0	0	0	0	0	0	0	0	0	0	19	0	20	0	0
hsa-miR-522-5p#Canonical_RC	0	0	0	16	0	0	0	10	0	0	0	0	0	0	0	0	0	0	0	0	9	17	34	14	0	19	0
hsa-miR-522-5p#lv3pE	0	0	0	0	0	0	16	0	0	0	0	6	0	0	0	21	0	0	0	0	0	0	0	0	0	0	0
hsa-miR-522-5p#lv3pT	0	0	0	11	0	0	16	0	0	20	15	13	0	0	0	0	31	0	0	13	17	0	21	0	16	14	0
hsa-miR-522-5p#mv	0	0	0	0	0	1	0	0	0	0	0	0	0	0	0	1	0	0	0	0	0	0	0	0	0	0	0
hsa-miR-522-5p#NTA(A)	0	0	0	0	0	0	0	0	0	0	0	0	0	0	0	0	0	17	0	0	0	0	32	0	0	14	20
hsa-miR-523-3p#lv5pT	0	0	0	0	0	0	17	0	0	0	0	0	0	0	5	0	0	0	0	0	0	0	0	0	0	0	0
hsa-miR-523-3p#NTA(G)	0	0	0	0	0	0	0	0	0	0	0	0	0	0	0	0	0	0	0	19	0	0	0	0	0	0	0
hsa-miR-523-5p#Canonical_RC	0	0	0	16	0	0	0	10	0	0	0	0	0	0	0	0	0	0	0	0	9	17	34	14	0	19	0
hsa-miR-523-5p#lv3pE	0	0	0	0	0	0	16	0	0	0	0	6	0	0	0	21	0	0	0	0	0	0	0	0	0	0	0
hsa-miR-523-5p#lv3pT	0	0	0	11	0	0	16	0	0	20	15	13	0	0	0	0	31	0	0	13	17	0	21	0	16	14	0
hsa-miR-523-5p#mv	0	0	0	0	0	1	0	0	0	0	0	0	0	0	0	1	0	0	0	0	0	0	0	0	0	0	0
hsa-miR-523-5p#NTA(A)	0	0	0	0	0	0	0	0	0	0	0	0	0	0	0	0	0	17	0	0	0	0	32	0	0	14	20
hsa-miR-525-5p#Canonical_RC	0	0	0	0	0	0	0	0	0	0	0	0	0	0	19	0	0	0	0	0	0	0	0	0	0	0	0
hsa-miR-525-5p#NTA(A)	0	0	0	0	0	0	0	0	0	0	0	0	0	0	0	0	0	0	0	0	0	0	36	0	0	0	0
hsa-miR-526a-5p#Canonical_RC	0	0	0	0	0	0	0	0	0	0	0	0	0	0	0	0	0	23	0	0	0	0	0	0	0	0	0
hsa-miR-526a-5p#lv3pT	14	0	0	16	0	0	0	0	0	37	1	0	0	0	28	0	0	0	0	0	0	0	24	0	0	0	20
hsa-miR-526a-5p#NTA(A)	0	0	0	0	0	0	0	0	0	0	0	0	1	0	1	0	0	0	0	0	0	0	21	0	0	0	0
hsa-miR-526b-5p#lv3pT	0	0	0	0	0	0	0	0	16	19	0	9	0	0	0	0	0	0	0	0	0	15	34	0	50	0	0
hsa-miR-526b-5p#NTA(A)	0	0	0	0	0	0	0	0	0	0	0	0	40	0	38	16	18	29	0	0	18	14	114	0	0	0	0
hsa-miR-532-5p#Canonical_RC	315	276	20	31	66	27	145	13	54	52	27	17	0	0	0	0	0	0	26	0	0	0	186	0	0	0	0
hsa-miR-532-5p#lv3pE	0	16	0	0	0	0	0	0	0	0	0	0	0	0	0	0	0	0	0	0	0	0	0	0	0	0	0
hsa-miR-532-5p#lv5pT	14	0	0	0	0	19	0	0	0	0	0	0	0	17	0	0	19	0	0	0	0	0	0	0	0	0	0
hsa-miR-532-5p#NTA(A)	0	20	0	24	0	0	17	0	33	50	30	23	0	20	0	20	32	146	90	27	25	17	65	0	0	16	17
hsa-miR-532-5p#NTA(C)	0	5	0	0	0	0	0	0	0	0	0	0	0	0	0	0	0	22	0	0	0	0	0	0	0	0	0
hsa-miR-532-5p#NTA(G)	0	0	0	0	0	0	0	0	0	0	0	0	0	0	0	0	0	31	0	0	0	0	0	0	0	0	0
hsa-miR-532-5p#NTA(U)	1	0	0	0	0	0	0	0	0	0	0	0	0	0	0	0	0	0	0	20	0	0	1	0	0	0	0
hsa-miR-542-3p#Canonical_RC	0	0	0	0	15	0	0	0	0	0	0	0	12	0	0	0	0	0	0	0	0	0	0	0	0	0	0
hsa-miR-542-3p#lv3pT	0	0	0	0	0	0	0	0	0	0	0	0	0	0	0	0	0	0	0	0	0	0	14	0	0	0	0
hsa-miR-543#Canonical_RC	0	0	0	0	0	0	0	0	0	0	0	0	0	0	0	0	0	0	0	0	0	0	0	0	0	48	0
hsa-miR-543#lv3pT	0	0	0	0	0	0	0	0	0	0	0	0	0	0	0	0	0	0	0	22	0	0	0	4	0	0	0
hsa-miR-548ad-3p#Canonical_RC	0	0	0	0	0	0	0	0	0	0	0	0	0	0	0	0	0	13	0	0	0	0	0	0	0	0	0
hsa-miR-548ag#lv3pE	0	0	0	3	0	19	0	0	0	0	0	0	0	0	0	0	0	0	0	0	0	0	0	0	0	0	0
hsa-miR-548ag#NTA(A)	0	0	0	0	0	0	0	0	0	0	0	0	0	0	0	0	0	20	0	0	0	0	0	0	0	0	0
hsa-miR-548ba#Canonical_RC	0	47	0	17	0	0	0	0	0	0	21	0	10	22	0	0	0	38	0	21	0	0	17	21	0	0	0
hsa-miR-548ba#lv3pE	0	0	0	0	0	0	0	0	0	0	0	0	0	0	0	0	0	20	0	0	0	0	0	0	0	0	0
hsa-miR-548ba#lv3pT	10	0	0	0	0	0	26	0	0	0	0	12	19	0	15	47	22	19	17	0	0	0	23	0	12	0	18
hsa-miR-548ba#lv5pT	0	0	0	0	0	0	0	0	0	0	0	0	0	0	0	0	0	1	0	0	0	0	0	0	0	0	0
hsa-miR-548ba#NTA(A)	0	0	0	1	0	0	0	0	0	0	0	0	0	0	0	0	0	0	0	0	0	0	0	0	0	0	0
hsa-miR-548j-3p#Canonical_RC	0	0	0	0	0	0	0	0	0	0	0	0	0	0	0	0	0	0	0	0	0	0	0	24	0	0	0
hsa-miR-548k#Canonical_RC	0	0	0	0	0	0	0	0	0	0	0	0	0	0	0	0	0	19	0	0	0	0	0	0	0	0	0
hsa-miR-548o-3p#Canonical_RC	0	0	0	0	0	0	0	0	0	0	0	0	0	0	0	0	0	0	0	0	0	0	84	27	1	22	0
hsa-miR-548o-3p#NTA(A)	0	0	0	0	0	0	0	0	0	0	0	0	0	0	0	0	0	0	0	0	0	0	1	1	0	0	0
hsa-miR-548o-3p#NTA(C)	0	0	0	0	0	0	0	0	0	0	0	0	0	0	0	0	0	0	0	0	0	0	1	0	0	0	0
hsa-miR-549a-3p#mv	0	0	0	0	0	0	0	0	0	20	0	0	0	0	0	0	0	0	0	0	0	0	0	0	0	0	0
hsa-miR-549a-5p#lv3pE	0	0	0	0	0	0	0	0	0	0	0	0	0	0	0	4	0	0	0	0	0	0	0	0	0	0	0
hsa-miR-550a-5p#lv3pE	0	0	0	0	0	0	0	0	0	0	0	0	0	0	0	0	0	0	0	0	0	0	7	0	0	0	0
hsa-miR-550a-5p#lv3pT	0	0	0	0	0	0	0	0	0	11	0	0	0	0	0	0	0	0	0	15	0	0	0	0	0	0	0
hsa-miR-551b-3p#NTA(U)	0	0	0	0	0	0	0	0	0	0	0	0	0	0	0	0	0	0	0	0	0	0	0	0	0	0	15
hsa-miR-556-5p#lv3pT	0	0	0	0	0	0	0	0	0	0	0	0	0	0	0	0	0	0	0	0	0	0	0	24	0	0	0
hsa-miR-5682#lv5pT	0	0	0	0	0	0	27	0	0	0	0	0	0	0	0	0	0	0	0	0	0	0	0	0	0	0	0
hsa-miR-5683#Canonical_RC	20	0	0	0	0	0	0	0	0	0	0	0	0	0	0	0	0	0	0	0	0	0	26	0	0	0	0
hsa-miR-5683#lv3pT	0	0	0	0	0	0	0	0	0	0	17	0	0	0	0	0	0	0	0	0	0	42	0	17	0	0	0
hsa-miR-5683#NTA(A)	0	0	0	0	0	0	0	0	0	0	0	0	18	0	0	0	0	0	0	0	0	0	0	0	0	0	0
hsa-miR-5699-3p#lv5pT	0	0	0	0	0	0	0	0	0	0	0	0	0	0	0	0	0	0	0	0	0	0	0	0	10	0	0
hsa-miR-5701#lv5pT	0	23	0	0	17	0	0	0	0	0	0	0	0	0	0	0	0	9	13	1	0	0	0	0	0	0	0
hsa-miR-576-5p#Canonical_RC	0	0	0	0	0	0	0	0	0	0	0	0	0	13	0	0	0	0	0	0	0	0	0	0	0	0	0
hsa-miR-582-3p#Canonical_RC	11	0	0	0	0	0	0	0	4	0	0	0	0	29	0	0	33	0	39	0	22	13	0	0	0	13	0
hsa-miR-582-3p#NTA(A)	0	0	0	0	0	0	0	0	0	0	0	0	0	1	0	0	1	0	1	0	0	0	0	0	0	0	0
hsa-miR-582-3p#NTA(C)	0	0	0	0	0	0	0	0	0	0	0	0	0	1	0	0	0	0	0	0	0	0	0	0	0	0	0
hsa-miR-582-5p#mv	0	0	0	0	0	0	0	0	0	0	0	0	0	0	0	0	0	0	0	0	13	0	0	0	0	0	0
hsa-miR-582-5p#NTA(A)	0	0	0	0	0	0	0	0	0	0	0	0	0	0	0	0	0	0	21	0	0	0	0	0	0	0	0
hsa-miR-585-3p#lv3pE	46	610	0	89	6	10	78	12	17	29	11	29	61	124	34	120	368	385	22	0	0	0	0	134	0	0	0
hsa-miR-585-3p#mv	24	97	0	16	0	0	14	16	0	0	0	0	59	39	0	36	30	56	0	0	0	0	0	8	0	12	0
hsa-miR-585-3p#NTA(A)	0	43	0	0	0	16	71	0	0	19	0	0	36	66	0	75	83	151	35	2	0	0	0	85	0	12	0
hsa-miR-585-3p#NTA(C)	0	0	0	0	0	0	1	0	0	0	0	0	0	9	0	0	0	1	0	21	0	0	0	0	0	0	0
hsa-miR-585-3p#NTA(G)	0	0	0	0	0	0	0	0	0	0	0	0	0	3	0	0	0	39	0	15	0	0	0	0	0	0	0
hsa-miR-585-3p#NTA(U)	21	234	2	4	0	17	15	0	0	11	0	12	0	27	0	0	45	158	0	4	0	0	0	0	0	0	0
hsa-miR-589-5p#lv3pE	0	0	0	0	0	0	7	0	0	0	0	0	0	0	0	0	0	0	0	0	0	0	34	0	0	0	6
hsa-miR-589-5p#lv3pT	0	0	0	0	0	0	0	0	0	0	0	0	0	0	0	0	0	0	0	0	0	0	3	0	0	0	0
hsa-miR-589-5p#NTA(A)	0	0	0	0	0	0	0	0	0	0	0	0	0	0	0	0	0	0	0	0	0	0	15	0	0	0	0
hsa-miR-592#lv3pE	0	0	0	0	0	0	0	0	0	18	0	0	0	0	0	0	0	0	0	0	0	0	0	0	0	0	0
hsa-miR-592#lv3pT	0	0	0	0	0	0	0	0	0	0	0	0	0	0	0	0	0	0	0	0	0	0	14	0	0	0	0
hsa-miR-592#NTA(A)	0	0	0	0	0	0	0	0	0	0	0	0	0	0	0	0	12	0	0	0	0	0	0	0	0	0	0
hsa-miR-615-3p#Canonical_RC	0	0	0	0	0	0	0	0	0	0	0	0	0	0	0	0	0	10	0	0	0	0	0	0	0	0	0
hsa-miR-615-3p#lv3pT	13	0	0	0	18	0	0	0	0	0	0	0	0	0	0	0	0	0	0	14	0	0	0	0	0	0	0
hsa-miR-615-3p#NTA(A)	1	0	0	0	0	0	0	0	0	0	0	0	0	0	0	0	0	0	0	0	0	0	20	0	0	0	0
hsa-miR-615-3p#NTA(G)	0	0	0	0	0	0	0	0	0	0	0	0	0	0	0	0	0	0	0	0	0	0	0	0	11	0	0
hsa-miR-615-3p#NTA(U)	0	17	0	0	0	0	0	0	0	0	0	0	0	0	0	0	0	0	0	0	0	0	0	0	0	0	0
hsa-miR-618#Canonical_RC	0	0	0	0	0	0	0	0	0	0	0	0	0	0	0	0	0	0	0	0	0	15	0	0	0	0	0
hsa-miR-625-3p#Canonical_RC	0	0	0	0	0	0	0	0	0	0	0	0	0	17	0	0	0	0	0	0	0	0	0	0	0	0	0
hsa-miR-625-3p#lv3pE	0	0	0	0	0	0	0	15	0	0	0	0	0	0	0	0	0	0	0	0	0	0	0	0	0	0	0
hsa-miR-625-3p#lv3pT	0	0	0	18	0	0	0	0	0	29	0	0	0	19	0	0	0	0	0	0	0	0	0	0	0	0	0
hsa-miR-625-3p#NTA(A)	0	0	0	0	0	0	0	0	0	0	0	0	14	0	42	0	17	60	0	0	0	0	16	16	0	13	0
hsa-miR-625-3p#NTA(U)	0	0	10	0	0	0	13	0	13	0	0	0	0	0	0	0	0	0	0	0	0	28	0	0	0	0	0
hsa-miR-625-5p#lv3pT	0	0	0	0	0	0	0	0	0	0	0	0	0	0	0	0	0	11	0	0	0	0	0	0	0	0	0
hsa-miR-628-3p#lv5pE	0	0	0	0	10	0	0	0	0	0	0	0	0	0	0	0	0	0	0	0	0	0	0	0	0	0	0
hsa-miR-628-3p#NTA(A)	0	0	0	0	0	0	0	0	0	0	0	0	10	0	16	0	2	23	0	11	0	0	19	0	0	0	0
hsa-miR-628-5p#lv3pT	8	0	0	0	0	0	0	0	0	0	0	0	0	0	0	0	0	0	0	0	0	0	0	0	0	0	0
hsa-miR-629-5p#Canonical_RC	0	0	0	0	0	0	0	0	0	0	0	0	0	0	0	0	0	14	0	0	0	0	11	0	0	0	0
hsa-miR-629-5p#lv3pE	0	0	0	0	0	0	0	0	0	0	0	0	0	0	0	0	0	32	45	19	1	0	43	7	0	15	0
hsa-miR-629-5p#NTA(C)	0	0	0	0	0	0	0	0	0	0	0	0	0	0	0	0	0	0	0	0	0	0	0	1	0	0	0
hsa-miR-632#mv	0	0	0	0	9	0	0	0	0	0	0	0	0	0	0	0	0	0	0	0	0	0	0	0	0	0	0
hsa-miR-642a-3p#Canonical_RC	0	0	0	0	0	0	0	0	0	0	0	0	0	0	0	0	0	0	0	0	0	0	0	0	29	0	0
hsa-miR-6500-3p#Canonical_RC	0	0	0	0	0	0	0	0	0	0	0	0	0	0	0	0	0	0	0	0	0	0	12	0	0	0	0
hsa-miR-6507-5p#mv	0	0	0	0	24	0	0	0	0	0	0	0	0	0	0	0	0	0	0	0	0	0	0	0	0	0	0
hsa-miR-6507-5p#NTA(A)	0	0	0	0	0	0	0	0	0	0	0	0	0	0	0	0	0	0	0	0	0	0	19	0	0	0	0
hsa-miR-651-5p#Canonical_RC	0	0	0	0	0	0	0	0	0	0	0	0	0	0	0	0	0	16	0	0	0	0	13	0	0	0	0
hsa-miR-651-5p#lv3pT	0	0	0	0	0	0	0	5	0	0	0	0	0	0	0	0	0	0	0	0	0	0	0	0	0	0	8
hsa-miR-651-5p#NTA(A)	0	0	0	0	0	0	0	0	0	0	0	0	0	0	0	0	0	0	0	0	0	0	25	0	0	0	0
hsa-miR-6511a-3p#Canonical_RC	0	0	0	0	0	0	0	0	0	0	17	0	0	0	0	0	0	0	0	0	0	0	0	0	0	0	0
hsa-miR-6511a-3p#lv5pT	0	0	0	0	0	0	0	0	0	0	0	17	0	0	0	0	0	0	0	0	0	0	0	0	0	0	0
hsa-miR-6511a-3p#mv	0	0	0	0	13	0	0	0	0	0	0	0	0	23	0	0	0	0	0	0	0	0	0	0	0	0	0
hsa-miR-6511b-3p#lv3pT	0	0	0	0	0	0	0	0	0	0	1	0	0	0	0	0	0	0	0	0	0	0	0	0	0	0	0
hsa-miR-6511b-3p#NTA(A)	0	0	0	0	0	0	0	0	0	0	0	0	0	0	14	0	0	0	0	0	0	0	0	0	0	14	0
hsa-miR-6511b-3p#NTA(U)	0	0	7	0	0	0	14	0	0	0	0	0	13	0	0	0	0	0	0	0	0	0	0	0	0	0	0
hsa-miR-6511b-5p#mv	0	0	0	0	10	0	0	0	0	0	0	0	0	0	0	0	0	0	0	0	0	0	0	0	0	0	0
hsa-miR-6516-5p#mv	0	0	0	0	0	0	0	0	0	0	0	0	0	0	0	0	0	0	0	0	0	0	15	0	0	0	0
hsa-miR-652-3p#Canonical_RC	0	0	0	0	0	1	0	0	0	11	0	0	0	0	0	0	0	0	11	0	0	0	32	0	0	0	0
hsa-miR-652-3p#lv3pE	0	0	0	0	0	0	0	0	0	0	0	0	5	0	0	0	0	0	0	0	0	0	0	0	0	0	0
hsa-miR-654-5p#Canonical_RC	0	0	0	0	0	0	0	0	0	0	0	0	0	0	0	0	0	0	0	0	0	0	6	0	0	0	0
hsa-miR-659-5p#Canonical_RC	0	0	35	0	0	0	0	0	0	0	0	0	0	0	0	0	0	0	0	0	0	0	0	0	0	0	0
hsa-miR-660-5p#Canonical_RC	0	0	0	0	0	0	0	0	0	0	0	0	0	0	0	0	0	0	0	18	0	0	4	0	0	0	0
hsa-miR-660-5p#lv3pE	27	0	0	0	0	0	55	0	34	10	59	0	36	88	2	0	7	165	17	0	19	0	93	12	0	0	19
hsa-miR-660-5p#NTA(A)	0	0	0	0	0	0	1	0	0	0	0	0	0	0	0	0	0	1	0	0	0	0	0	0	0	0	13
hsa-miR-660-5p#NTA(G)	0	0	0	0	0	0	0	0	0	0	0	0	0	0	0	0	0	0	0	0	0	0	1	0	0	0	0
hsa-miR-664a-5p#lv3pT	11	0	0	0	0	0	0	0	0	0	0	0	0	0	0	0	0	22	0	0	0	0	0	0	0	0	0
hsa-miR-664a-5p#mv	6	0	0	0	0	0	0	0	0	0	0	0	11	0	0	0	0	0	0	0	0	0	0	0	0	0	0
hsa-miR-664b-5p#Canonical_RC	0	0	0	0	0	0	0	0	0	0	0	0	0	10	0	0	0	0	0	0	0	0	0	0	0	0	0
hsa-miR-664b-5p#lv3pT	30	38	8	0	0	24	0	0	13	0	17	7	31	54	0	0	0	26	0	0	0	0	0	0	0	0	0
hsa-miR-664b-5p#NTA(A)	12	0	0	0	0	0	0	0	0	0	0	0	0	0	0	0	0	0	0	0	0	0	0	0	0	0	0
hsa-miR-671-3p#Canonical_RC	0	0	0	0	0	0	0	0	0	0	0	0	0	0	0	0	0	13	0	0	0	0	0	0	0	0	0
hsa-miR-671-3p#NTA(A)	0	0	0	0	0	0	0	0	4	0	0	0	0	0	0	0	0	0	0	0	0	0	0	0	0	0	0
hsa-miR-671-5p#lv3pE	0	0	0	0	0	0	0	0	0	0	0	0	0	0	0	0	0	0	0	0	0	0	1	22	0	0	0
hsa-miR-671-5p#NTA(A)	0	0	0	0	0	0	0	0	0	0	0	0	0	0	0	0	0	0	0	2	0	0	0	0	0	0	0
hsa-miR-6715a-3p#Canonical_RC	0	0	0	0	0	0	0	0	0	0	0	0	0	0	0	0	0	0	0	0	0	0	6	0	0	0	0
hsa-miR-6724-5p#lv5pT	0	0	0	0	0	0	19	0	0	0	0	0	0	0	0	0	0	0	0	0	0	0	0	0	0	0	0
hsa-miR-6766-3p#NTA(A)	0	0	0	0	0	0	0	0	0	0	0	0	0	0	0	0	0	17	0	0	0	0	0	0	0	0	0
hsa-miR-6772-3p#Canonical_RC	0	0	0	0	0	0	0	0	0	23	0	0	0	0	0	0	0	0	0	0	0	0	0	0	0	0	0
hsa-miR-6785-5p#lv3pT	0	12	0	0	0	0	0	0	0	0	0	0	0	0	0	0	0	0	0	0	0	0	0	0	0	0	0
hsa-miR-6785-5p#NTA(A)	0	1	0	0	0	0	0	0	0	0	0	0	0	0	0	0	0	0	0	0	0	0	0	0	0	0	0
hsa-miR-6787-3p#lv3pT	0	1	0	1	0	0	0	0	0	0	0	0	0	1	0	1	0	0	1	0	0	0	0	0	0	0	0
hsa-miR-6789-5p#mv	0	0	0	0	0	0	12	0	0	0	0	0	0	0	0	0	0	0	0	0	0	0	0	0	0	0	0
hsa-miR-6800-5p#lv3pT	1	0	0	0	0	0	0	0	0	0	0	0	0	0	0	0	0	0	0	0	0	0	0	0	0	0	0
hsa-miR-6800-5p#lv5pT	11	0	0	0	0	0	0	0	0	0	0	0	0	0	0	0	0	0	0	0	0	0	0	0	0	0	0
hsa-miR-6800-5p#mv	7	0	0	0	0	0	14	0	0	0	0	0	0	0	0	0	0	0	0	0	0	0	0	0	0	0	0
hsa-miR-6800-5p#NTA(C)	1	0	0	0	0	0	0	0	0	0	0	0	0	0	0	0	0	0	0	0	0	0	0	0	0	0	0
hsa-miR-6803-3p#Canonical_RC	0	13	0	0	0	0	0	0	0	0	0	0	0	0	0	0	0	0	0	0	0	0	0	0	0	0	0
hsa-miR-6821-5p#mv	0	20	0	60	27	0	10	10	54	18	0	24	0	0	0	0	0	0	0	0	0	0	0	0	0	0	0
hsa-miR-6823-3p#mv	1	0	0	0	0	0	0	0	0	0	0	0	0	0	0	0	0	0	0	0	0	0	0	0	0	0	0
hsa-miR-6839-5p#lv3pT	10	0	0	0	0	0	0	0	0	0	0	0	0	0	0	0	0	0	0	0	0	0	0	0	0	0	0
hsa-miR-7-5p#Canonical_RC	611	597	228	909	613	553	930	277	689	1021	606	604	194	553	145	636	916	1361	1406	296	938	348	7996	1371	1849	811	725
hsa-miR-7-5p#lv3pE	27	12	0	20	19	18	22	0	12	0	34	0	0	23	0	0	24	29	51	0	0	0	14	0	0	0	0
hsa-miR-7-5p#lv3pT	248	145	38	191	102	84	239	28	101	373	151	147	130	257	148	68	174	611	149	16	38	12	427	32	1	54	52
hsa-miR-7-5p#lv5pE	0	0	0	0	0	0	0	12	0	0	0	0	0	0	0	0	0	0	0	0	0	0	0	0	0	0	0
hsa-miR-7-5p#lv5pT	0	0	0	0	0	0	0	0	0	0	0	0	0	0	0	0	0	0	0	0	0	0	2	0	0	0	0
hsa-miR-7-5p#mv	0	0	0	0	0	0	0	0	0	0	0	0	0	0	0	0	0	1	0	0	0	0	0	0	0	0	1
hsa-miR-7-5p#NTA(A)	108	130	36	19	13	58	87	0	117	114	29	20	385	525	28	162	109	562	155	57	47	37	387	147	20	52	39
hsa-miR-7-5p#NTA(C)	0	0	0	0	0	0	0	0	0	0	0	0	0	0	0	0	0	0	16	0	0	0	0	0	0	0	0
hsa-miR-7-5p#NTA(G)	0	0	0	0	0	1	0	0	0	0	0	1	0	16	0	0	0	1	1	0	0	0	5	3	15	0	0
hsa-miR-7-5p#NTA(U)	1	1	0	0	1	1	0	0	0	0	1	0	1	1	0	0	1	0	0	0	0	0	2	0	0	0	0
hsa-miR-7161-3p#lv3pT	0	44	0	0	0	0	0	0	22	0	0	0	0	0	0	0	0	23	0	0	0	0	0	0	0	0	0
hsa-miR-7161-3p#NTA(U)	0	0	0	0	0	0	0	0	0	0	0	0	0	0	0	0	0	1	0	0	0	0	0	0	0	0	0
hsa-miR-7161-5p#lv5pT	0	0	0	0	0	16	0	0	0	0	0	0	0	0	0	0	0	0	0	0	0	0	0	0	0	0	0
hsa-miR-7161-5p#mv	0	0	0	0	0	0	0	14	0	0	0	0	0	0	0	0	0	0	0	0	0	0	0	0	0	0	0
hsa-miR-744-3p#NTA(A)	0	0	0	0	0	0	0	0	0	0	0	0	14	0	0	0	0	0	0	0	0	0	0	0	0	0	0
hsa-miR-760#NTA(U)	0	0	0	0	5	0	0	0	0	0	0	0	0	0	0	0	0	0	0	0	0	0	12	18	0	0	0
hsa-miR-769-5p#Canonical_RC	28	20	0	10	0	0	0	0	0	0	16	0	0	0	0	0	0	0	0	0	0	0	5	0	0	0	0
hsa-miR-769-5p#lv3pT	0	0	0	0	0	0	11	10	0	0	0	22	0	0	0	0	0	32	0	0	0	0	0	35	0	0	0
hsa-miR-769-5p#NTA(A)	0	0	0	0	0	0	0	0	0	0	0	0	14	0	0	0	0	15	0	0	0	0	0	0	0	0	0
hsa-miR-7702#Canonical_RC	0	16	0	0	0	0	0	0	12	0	0	0	0	0	0	20	0	0	0	0	0	0	0	0	0	0	0
hsa-miR-7702#lv5pT	0	0	0	0	0	0	14	0	0	0	0	0	0	0	0	0	0	0	0	0	0	0	0	0	0	0	0
hsa-miR-7702#NTA(A)	0	0	0	0	0	0	0	0	0	0	0	0	0	0	0	0	0	0	0	0	0	0	21	0	0	0	0
hsa-miR-7704#lv3pT	65	131	14	39	34	6	54	19	20	49	0	38	116	106	41	7	13	187	87	11	0	14	169	37	13	32	32
hsa-miR-7704#lv5pT	0	0	0	0	0	0	0	0	0	0	0	0	0	0	0	0	0	0	0	0	0	0	13	0	0	0	0
hsa-miR-7704#mv	0	9	0	7	0	0	0	6	0	0	0	0	10	0	11	0	0	0	0	0	0	11	0	0	0	0	0
hsa-miR-7704#NTA(A)	0	0	0	0	0	0	0	0	0	0	0	0	2	0	0	0	0	0	11	0	0	0	0	0	0	0	0
hsa-miR-7704#NTA(G)	0	0	0	0	0	0	0	0	0	0	0	0	0	0	0	0	0	11	0	0	0	0	0	0	0	0	0
hsa-miR-7706#Canonical_RC	0	0	0	0	0	0	0	0	0	0	0	0	0	0	0	0	0	0	0	0	0	0	0	11	0	0	0
hsa-miR-7706#lv3pT	0	0	0	0	0	0	0	0	9	0	0	0	0	0	0	0	0	0	0	0	0	0	1	0	14	0	0
hsa-miR-7706#NTA(U)	0	0	0	0	0	0	0	0	0	0	11	0	0	0	0	0	0	0	0	0	0	0	8	0	0	0	0
hsa-miR-7977#lv3pT	8	0	0	0	22	0	0	0	7	0	0	0	0	0	0	0	0	0	0	0	0	0	0	0	0	0	0
hsa-miR-873-5p#mv	0	0	0	0	0	0	0	0	0	0	0	0	0	0	0	0	0	16	0	0	0	0	15	0	0	0	0
hsa-miR-874-3p#lv3pE	0	22	0	0	0	0	0	0	0	0	0	0	0	0	0	0	0	0	0	0	0	0	0	0	0	0	0
hsa-miR-877-5p#lv3pE	0	0	0	0	0	0	0	0	0	0	0	0	0	0	0	0	0	0	0	0	0	0	43	0	20	0	0
hsa-miR-877-5p#mv	0	0	0	0	0	0	0	0	15	0	0	0	0	0	0	0	0	0	0	0	0	0	0	0	0	0	0
hsa-miR-877-5p#NTA(A)	13	0	0	0	0	0	0	0	0	0	0	0	0	0	0	0	0	0	0	0	0	0	0	0	0	0	0
hsa-miR-885-3p#Canonical_RC	0	0	0	0	0	0	0	0	0	0	0	0	0	0	0	0	0	0	0	0	0	0	7	0	0	0	0
hsa-miR-885-5p#Canonical_RC	0	0	0	0	0	0	0	0	0	0	0	0	0	32	0	0	0	0	0	0	0	0	0	0	0	0	0
hsa-miR-887-5p#mv	0	0	0	0	0	0	0	0	0	18	0	0	0	0	0	0	0	0	0	0	0	0	0	0	0	0	0
hsa-miR-888-5p#Canonical_RC	0	0	0	0	0	0	22	0	6	0	0	0	0	0	0	0	0	0	0	0	0	0	0	0	0	0	0
hsa-miR-888-5p#lv3pE	22	36	10	0	21	0	37	31	0	0	0	68	14	21	38	76	20	34	19	18	13	22	183	33	8	43	17
hsa-miR-888-5p#lv3pT	0	0	0	0	0	0	0	0	0	0	0	0	0	0	0	20	0	0	0	0	0	0	0	0	0	0	0
hsa-miR-888-5p#NTA(A)	0	0	0	0	0	0	0	0	0	0	0	0	0	0	0	0	0	0	0	0	0	0	1	0	0	0	0
hsa-miR-888-5p#NTA(C)	0	0	0	0	0	0	0	0	0	0	0	0	0	0	0	0	0	0	0	0	0	0	1	0	0	0	0
hsa-miR-891a-5p#Canonical_RC	0	0	0	0	0	0	17	0	0	20	0	0	0	15	0	0	0	0	0	0	0	0	25	6	0	0	12
hsa-miR-891a-5p#lv3pT	84	50	0	0	0	0	36	0	0	0	25	18	60	16	0	37	38	42	41	16	24	16	96	33	0	0	11
hsa-miR-891a-5p#NTA(A)	11	0	0	0	0	0	22	11	0	0	0	0	0	37	55	1	56	9	0	13	0	18	99	0	0	17	59
hsa-miR-891a-5p#NTA(C)	0	0	0	0	0	0	0	0	0	0	0	0	11	0	0	0	0	0	0	12	0	0	8	0	0	0	0
hsa-miR-891a-5p#NTA(G)	0	0	0	0	0	0	0	0	0	0	0	0	12	0	0	0	0	0	19	0	0	0	110	0	10	0	0
hsa-miR-891a-5p#NTA(U)	0	0	0	0	0	0	0	0	0	0	0	0	0	1	0	0	0	0	0	0	0	0	32	15	0	0	0
hsa-miR-892a#Canonical_RC	0	0	0	0	0	0	0	0	0	0	0	0	0	16	0	0	0	0	0	0	0	0	0	0	0	0	0
hsa-miR-892a#lv3pE	0	0	0	0	25	0	21	11	0	0	27	14	0	0	0	26	0	24	0	0	20	22	29	203	0	0	0
hsa-miR-892a#mv	0	0	0	0	0	0	0	0	0	0	0	0	0	16	0	0	0	0	0	0	0	0	0	0	0	0	0
hsa-miR-892a#NTA(A)	0	0	0	0	0	0	0	0	0	0	24	0	0	0	0	24	0	0	0	0	0	0	0	18	0	0	11
hsa-miR-892a#NTA(U)	0	0	0	0	0	0	0	0	0	0	0	0	0	0	0	0	0	0	0	0	0	0	0	16	0	0	0
hsa-miR-892b#lv5pE	0	0	0	0	0	0	15	0	0	0	0	0	0	0	0	0	0	0	0	0	0	0	5	0	0	0	0
hsa-miR-892b#mv	16	0	0	0	0	0	0	0	0	0	0	0	0	0	0	0	0	0	0	0	0	0	0	0	0	0	0
hsa-miR-892b#NTA(A)	0	0	0	0	0	0	0	0	15	0	0	0	0	15	0	0	0	20	0	0	0	0	18	0	21	0	0
hsa-miR-892c-3p#Canonical_RC	0	0	0	0	0	0	0	0	0	0	0	0	0	0	0	0	0	0	0	0	0	0	0	40	0	0	0
hsa-miR-892c-3p#mv	0	0	0	0	0	0	0	0	0	0	0	0	0	16	0	0	0	0	0	0	0	0	0	0	0	0	0
hsa-miR-9-3p#lv3pT	0	0	0	0	0	0	0	0	0	0	0	0	0	0	0	0	0	0	0	0	0	0	18	13	20	0	0
hsa-miR-9-3p#NTA(U)	0	0	0	0	0	0	0	0	0	0	0	0	0	0	0	0	0	0	0	0	0	0	0	17	0	0	0
hsa-miR-9-5p#Canonical_RC	16	76	0	0	49	0	14	0	15	12	55	0	35	46	25	43	38	162	181	40	96	0	1512	270	109	55	75
hsa-miR-9-5p#lv3pE	0	0	0	0	0	0	0	0	0	0	0	0	0	0	0	0	0	0	0	0	0	0	14	0	0	0	0
hsa-miR-9-5p#lv3pT	56	31	0	0	24	0	32	18	14	0	49	0	37	99	20	25	42	172	187	18	61	20	1262	151	79	33	36
hsa-miR-9-5p#mv	0	0	0	0	0	0	0	0	0	0	0	0	0	1	0	0	0	0	0	9	0	0	0	0	0	0	0
hsa-miR-9-5p#NTA(A)	0	16	0	0	0	0	0	0	0	14	0	0	35	71	16	11	27	36	15	49	31	31	512	63	0	0	0
hsa-miR-9-5p#NTA(C)	0	0	0	0	0	0	0	0	0	0	0	0	0	0	0	0	0	0	0	0	0	0	3	0	0	0	0
hsa-miR-9-5p#NTA(G)	0	0	0	0	0	0	0	0	0	0	0	0	0	19	0	0	0	0	0	0	0	0	0	0	0	0	0
hsa-miR-9-5p#NTA(U)	0	0	0	0	0	0	0	0	0	0	0	0	0	0	0	0	0	18	0	0	0	0	34	22	0	0	0
hsa-miR-92a-3p#Canonical_RC	614	688	73	327	359	168	451	167	223	394	312	335	363	492	139	45	227	656	264	27	50	45	671	167	0	124	107
hsa-miR-92a-3p#lv3pE	0	17	0	9	0	0	16	10	17	0	17	0	2	0	0	1	0	20	1	0	0	0	10	0	0	0	1
hsa-miR-92a-3p#lv3pT	26	33	0	0	0	16	36	12	0	0	14	7	8	0	0	0	21	19	18	0	0	0	0	0	0	0	15
hsa-miR-92a-3p#lv5pT	0	0	0	0	0	0	13	0	0	0	0	0	0	0	0	0	0	0	0	0	0	0	0	0	0	0	0
hsa-miR-92a-3p#mv	0	0	0	0	0	0	0	0	0	0	0	0	0	0	0	0	0	17	0	0	0	0	0	0	0	0	0
hsa-miR-92a-3p#NTA(A)	105	109	75	17	118	21	558	45	300	390	334	171	575	1025	1187	950	1169	1387	505	616	643	395	1557	152	198	670	1082
hsa-miR-92a-3p#NTA(C)	17	13	0	0	11	0	10	0	17	0	0	36	29	24	32	35	0	20	12	0	0	0	24	0	0	0	0
hsa-miR-92a-3p#NTA(G)	0	0	0	0	0	0	0	0	0	0	0	0	0	0	1	0	17	20	0	15	0	0	0	0	0	0	0
hsa-miR-92a-3p#NTA(U)	16	18	0	12	1	0	0	0	0	16	0	0	19	36	18	0	0	58	32	6	0	17	75	34	0	23	15
hsa-miR-92b-3p#Canonical_RC	89	80	11	68	50	13	88	0	37	30	0	45	0	44	0	15	0	36	23	0	29	0	964	154	66	5	15
hsa-miR-92b-3p#lv3pE	0	0	0	0	0	0	0	0	0	0	0	0	0	0	9	0	0	0	0	0	0	0	0	0	0	0	0
hsa-miR-92b-3p#lv3pT	14	0	11	0	0	0	18	0	0	0	0	0	0	0	0	0	0	14	26	0	0	0	4	0	0	0	0
hsa-miR-92b-3p#lv5pT	0	0	0	0	0	13	0	0	0	35	0	0	0	0	0	0	0	3	0	0	0	0	0	0	0	0	0
hsa-miR-92b-3p#NTA(A)	1	52	7	1	0	12	70	0	29	41	39	22	404	258	132	122	279	523	232	26	32	31	383	157	7	68	117
hsa-miR-92b-3p#NTA(G)	0	0	0	0	0	0	16	0	0	0	0	0	35	33	0	15	0	26	22	18	0	0	0	16	0	0	0
hsa-miR-92b-3p#NTA(U)	13	49	0	0	21	8	63	0	22	31	18	20	0	13	0	0	17	1	16	20	12	0	46	15	16	0	0
hsa-miR-92b-5p#lv3pE	0	0	0	0	0	0	14	0	0	0	0	0	0	0	0	0	0	0	0	0	0	0	10	0	9	0	0
hsa-miR-93-5p#Canonical_RC	0	19	14	0	0	0	0	0	0	0	0	21	0	0	0	0	0	0	0	0	0	0	51	26	0	0	0
hsa-miR-93-5p#lv3pE	0	0	0	24	0	0	0	0	0	0	0	0	0	0	0	0	0	0	0	0	0	0	0	0	0	0	0
hsa-miR-93-5p#NTA(A)	0	0	0	0	0	0	0	0	0	0	0	0	0	0	0	0	0	0	0	0	0	0	37	0	0	0	0
hsa-miR-93-5p#NTA(C)	0	0	0	0	0	0	0	0	0	0	0	0	0	0	14	0	0	0	0	0	0	0	0	0	0	0	0
hsa-miR-935#lv5pT	0	0	18	0	0	0	0	0	0	0	0	0	0	0	0	22	0	0	0	0	0	0	0	0	0	0	0
hsa-miR-935#mv	0	0	0	0	0	0	0	0	0	0	0	0	0	0	20	0	0	0	0	0	0	0	0	0	0	0	0
hsa-miR-935#NTA(A)	0	0	0	0	0	0	0	0	0	0	0	0	0	0	0	0	0	0	0	0	0	0	17	0	0	0	0
hsa-miR-937-3p#Canonical_RC	0	0	0	0	0	0	0	0	0	0	0	0	0	0	0	0	0	0	16	0	0	0	0	0	0	0	0
hsa-miR-937-3p#mv	13	0	0	0	0	0	17	0	9	0	0	24	32	0	0	0	0	17	35	0	0	0	25	0	0	20	0
hsa-miR-937-3p#NTA(A)	0	0	0	0	0	0	0	0	0	0	0	0	11	23	11	0	16	0	0	0	0	0	78	0	0	0	0
hsa-miR-937-3p#NTA(C)	0	0	0	0	0	0	0	0	0	0	0	0	0	0	0	0	0	1	0	0	0	0	0	0	0	0	0
hsa-miR-937-3p#NTA(G)	0	0	0	0	0	0	0	0	0	0	0	0	0	0	28	0	0	0	0	0	0	0	0	0	0	0	0
hsa-miR-937-3p#NTA(U)	0	0	0	0	0	0	0	0	0	0	0	0	0	0	0	0	0	18	0	0	0	0	19	0	0	0	0
hsa-miR-939-5p#NTA(U)	0	0	0	0	0	0	15	0	0	0	0	0	0	0	0	0	0	0	0	0	0	0	0	0	0	0	0
hsa-miR-941#Canonical_RC	0	0	0	19	42	0	0	0	20	0	0	0	10	28	0	0	0	8	0	16	0	0	90	15	83	58	42
hsa-miR-941#NTA(A)	0	0	0	0	0	0	0	0	0	0	0	0	0	0	25	0	0	0	0	0	0	0	2	0	0	1	0
hsa-miR-942-5p#Canonical_RC	0	0	3	0	0	0	0	0	0	0	0	0	0	0	0	0	0	0	0	0	0	0	10	0	0	0	0
hsa-miR-942-5p#lv3pE	0	0	0	10	0	0	0	0	0	0	0	0	0	0	0	0	0	0	0	0	0	0	0	0	0	0	0
hsa-miR-942-5p#mv	0	0	0	10	0	0	0	0	0	0	0	0	0	0	0	0	0	0	0	0	0	0	0	0	0	0	0
hsa-miR-942-5p#NTA(A)	0	0	0	0	0	0	0	0	0	0	0	0	0	0	0	0	0	0	0	0	0	0	0	0	1	0	0
hsa-miR-942-5p#NTA(C)	0	0	0	0	0	0	0	0	0	0	0	15	0	0	0	0	0	0	0	0	0	0	0	0	0	0	0
hsa-miR-944#Canonical_RC	0	0	0	0	0	0	0	0	0	13	0	0	0	0	0	0	0	0	0	0	0	0	0	0	0	0	0
hsa-miR-944#NTA(A)	0	0	0	0	0	0	0	0	0	0	0	0	0	1	0	0	0	0	0	0	0	0	0	0	0	0	0
hsa-miR-944#NTA(U)	0	0	0	0	0	0	0	12	0	0	0	0	8	13	0	0	0	0	0	0	0	0	9	0	0	0	0
hsa-miR-95-3p#Canonical_RC	0	0	0	0	0	0	0	0	14	0	0	0	0	0	0	0	0	0	0	0	0	0	0	0	0	0	0
hsa-miR-95-3p#lv3pT	24	0	0	0	0	13	0	0	13	16	0	0	39	51	0	19	0	73	37	0	20	14	14	0	33	0	9
hsa-miR-95-3p#mv	0	0	0	0	0	0	0	0	0	0	0	0	0	0	0	0	16	0	0	0	0	0	0	0	0	0	0
hsa-miR-95-3p#NTA(A)	1	0	0	0	0	0	0	0	0	0	0	0	0	1	0	0	0	1	0	0	0	0	0	0	0	0	0
hsa-miR-96-5p#Canonical_RC	7	15	10	52	30	12	23	0	33	15	38	0	33	17	30	21	11	19	0	35	14	12	30	0	9	0	18
hsa-miR-96-5p#lv3pT	0	0	0	0	0	0	0	0	0	0	0	0	0	0	0	16	0	0	0	0	0	0	0	0	0	0	0
hsa-miR-96-5p#NTA(A)	0	0	0	0	0	0	0	0	0	0	0	0	0	0	1	0	0	0	0	0	0	0	0	0	0	0	0
hsa-miR-98-5p#lv3pT	0	0	0	0	0	0	0	0	0	0	0	0	0	0	0	0	15	0	0	0	13	0	0	0	0	0	0
hsa-miR-9901#lv5pE	22	0	5	0	4	0	0	6	0	14	0	0	0	0	28	0	0	16	0	0	16	0	0	0	0	0	0
hsa-miR-9901#mv	12	42	5	27	0	9	9	11	0	11	0	35	0	0	0	0	0	0	0	0	0	0	0	0	0	0	0
hsa-miR-9901#NTA(A)	0	1	0	0	14	0	35	0	0	19	0	13	34	15	60	0	12	42	0	41	12	0	0	0	0	0	0
hsa-miR-9901#NTA(U)	0	18	0	0	0	0	0	0	0	0	0	0	0	1	0	0	0	0	0	0	0	0	11	0	0	0	0
hsa-miR-9903#Canonical_RC	0	0	0	0	0	0	0	0	0	0	0	0	0	0	0	0	0	0	0	0	14	0	0	0	0	0	0
hsa-miR-9903#NTA(A)	0	0	0	0	0	0	0	0	0	0	0	0	0	0	0	0	0	6	0	0	13	0	0	0	0	0	0
hsa-miR-99a-5p#Canonical_RC	9	34	0	0	17	0	0	17	0	0	0	0	0	0	0	25	0	66	15	0	0	0	10	36	17	0	41
hsa-miR-99a-5p#lv3pE	0	0	0	0	0	0	0	0	0	0	0	0	0	0	0	0	0	0	0	0	0	0	1	0	0	0	0
hsa-miR-99a-5p#lv3pT	100	52	54	110	139	137	0	18	133	108	142	57	58	152	114	169	233	118	176	149	95	71	240	149	0	38	47
hsa-miR-99a-5p#lv5pE	0	0	0	0	0	0	0	0	0	0	0	0	0	0	0	0	0	27	0	0	0	0	0	0	0	0	0
hsa-miR-99a-5p#mv	30	39	0	61	27	0	0	0	0	32	0	21	0	0	0	0	22	0	31	0	0	28	0	0	0	0	0
hsa-miR-99a-5p#NTA(A)	0	46	0	119	0	33	0	0	49	29	0	0	26	0	38	42	0	28	84	70	12	0	65	16	0	0	23
hsa-miR-99a-5p#NTA(C)	0	0	0	0	0	0	0	0	0	0	0	0	0	0	0	0	0	0	0	0	0	0	1	0	0	0	0
hsa-miR-99a-5p#NTA(G)	0	0	0	0	0	0	0	0	0	0	0	0	0	0	0	0	0	0	0	0	0	0	1	0	0	0	0
hsa-miR-99a-5p#NTA(U)	0	0	0	33	0	17	0	16	0	0	0	0	0	0	0	0	0	1	0	0	0	0	17	0	0	0	0
hsa-miR-99b-3p#Canonical_RC	0	0	0	0	0	0	0	0	0	0	0	0	0	0	0	0	0	0	0	0	0	0	16	0	0	0	0
hsa-miR-99b-5p#Canonical_RC	43	41	15	0	0	0	17	0	0	29	16	0	0	0	0	0	0	51	35	0	0	0	517	51	62	0	0
hsa-miR-99b-5p#lv3pT	0	0	0	0	0	0	22	0	25	0	0	0	0	0	0	0	0	21	0	0	0	0	28	14	0	0	0
hsa-miR-99b-5p#NTA(A)	0	0	0	0	0	0	0	0	0	0	0	0	0	0	0	0	0	0	0	0	0	0	0	2	0	0	0
hsa-miR-99b-5p#NTA(C)	0	0	0	0	0	0	0	0	0	0	0	0	0	0	0	0	0	0	0	0	0	0	0	1	0	0	0

## Sheet: Supplemental Table S5
Supplemental Table S5. Significantly differentially expressed isomiRs in oocytes and embryos.
# Significantly differentially expressed isomiRs (FDR < 0.05) between human oocytes (n=12) and embryos (n=10) according to MACAU2.0 R package (Sun et al. 2017).
# Number of observations (num-IDV), effect size (beta), standard error of beta (se(beta)), p-value, heritability (h2), variance (sigma2), model convergence information (converged), and FDR.
# Exact mature sequence, exact. 3’ trimmed, lv3pT; 3’ elongated, lv3pE; 5’ elongated, lv5pE; Non-templated nucleotide addition (NTA) of A, ntaA; NTA of G, ntaG; NTA of U, ntaU.
isomiR	num-IDV	beta	se(beta)	p-value	h2	sigma2	converged	FDR
hsa-miR-532-5p#exact	22	-3.2282	0.5085	2.17e-10	0.339	0.7427	TRUE	5.45e-08
hsa-miR-363-3p#exact	22	2.8679	0.4578	3.74e-10	0	0.5539	TRUE	5.45e-08
hsa-miR-25-3p#ntaA	22	3.6272	0.5954	1.11e-09	0.8808	1.0774	TRUE	1.08e-07
hsa-miR-92a-3p#ntaA	22	1.7322	0.3374	2.85e-07	0.1394	0.5287	TRUE	2.07e-05
hsa-miR-148a-3p#ntaA	22	1.635	0.3409	1.61e-06	0.3832	0.3557	TRUE	8.11e-05
hsa-miR-375-3p#exact	22	2.2029	0.46	1.67e-06	0	0.5152	TRUE	8.11e-05
hsa-miR-320a-3p#ntaU	22	-1.7637	0.3713	2.04e-06	0	0.6403	TRUE	8.47e-05
hsa-miR-1298-5p#lv3pT	22	-2.4557	0.5321	3.93e-06	0.0999	0.9458	TRUE	0.000137
hsa-miR-509-3-5p#ntaA	22	3.5615	0.7744	4.24e-06	1	1.9145	TRUE	0.000137
hsa-miR-629-5p#lv3pE	22	2.1696	0.4791	5.93e-06	0	0.6075	TRUE	0.000173
hsa-miR-218-5p#ntaA	22	2.2601	0.5048	7.55e-06	0	1.1312	TRUE	0.0002
hsa-miR-184#exact	22	-0.7457	0.1696	1.1e-05	0	0.1402	TRUE	0.000267
hsa-miR-92a-3p#exact	22	-1.4153	0.3439	3.86e-05	1	0.3707	TRUE	0.000804
hsa-miR-16-2-3p#ntaA	22	2.0854	0.5068	3.87e-05	0	0.8313	TRUE	0.000804
hsa-miR-372-3p#ntaA	22	1.1696	0.2911	5.87e-05	0.7286	0.305	TRUE	0.00109
hsa-miR-27b-3p#ntaA	22	1.9535	0.4867	5.97e-05	0	0.6178	TRUE	0.00109
hsa-miR-9-5p#lv3pT	22	1.8899	0.4814	8.63e-05	0	1.0984	TRUE	0.00148
hsa-miR-372-3p#lv3pT	22	-0.6128	0.1576	0.000101	0.0761	0.1191	TRUE	0.00163
hsa-miR-192-5p#ntaA	22	2.2946	0.5965	0.00012	0.1297	1.5483	TRUE	0.00183
hsa-miR-9-5p#exact	22	2.1426	0.5595	0.000128	0	1.4791	TRUE	0.00187
hsa-miR-423-3p#exact	22	-2.1361	0.5618	0.000143	0.0162	1.2867	TRUE	0.00198
hsa-miR-508-3p#exact	22	-1.6775	0.4534	0.000216	0.1129	0.7691	TRUE	0.00286
hsa-miR-509-3p#ntaA	22	1.958	0.5326	0.000236	0.1975	0.9237	TRUE	0.00299
hsa-miR-151a-3p#lv5pE	22	-1.7804	0.4862	0.00025	0	0.9587	TRUE	0.00303
hsa-miR-26a-5p#exact	22	-0.829	0.2379	0.000493	0.7661	0.1975	TRUE	0.00574
hsa-miR-372-3p#mv	22	-1.1469	0.331	0.000531	0	0.511	TRUE	0.00594
hsa-miR-7-5p#lv3pT	22	-0.9913	0.2883	0.000586	0	0.3926	TRUE	0.00631
hsa-miR-192-5p#ntaU	22	-1.5086	0.4404	0.000614	0	0.929	TRUE	0.00638
hsa-miR-373-3p#ntaA	22	1.8097	0.5325	0.000678	0	1.3475	TRUE	0.00681
hsa-miR-6821-5p#mv	22	-2.1588	0.6471	0.000849	0.4355	1.195	TRUE	0.00824
hsa-miR-320a-3p#lv3pE	22	1.9964	0.6106	0.00108	0	1.5681	TRUE	0.0098
hsa-miR-183-5p#exact	22	0.9941	0.304	0.00108	0.6479	0.3259	TRUE	0.0098
hsa-miR-372-3p#exact	22	-0.3448	0.1061	0.00116	1	0.037	TRUE	0.00998
hsa-miR-9901#mv	22	-2.2653	0.6976	0.00117	0.9496	1.1875	TRUE	0.00998
hsa-miR-30e-5p#lv3pE	22	-1.0468	0.3308	0.00155	0	0.5049	TRUE	0.0129
hsa-miR-22-3p#ntaA	22	1.8023	0.577	0.00179	0.2333	1.2348	TRUE	0.0145
hsa-miR-92b-3p#ntaA	22	1.6837	0.5419	0.00189	0.6294	1.0455	TRUE	0.0149
hsa-miR-514a-3p#exact	22	-0.4792	0.1555	0.00206	0	0.1181	TRUE	0.0158
hsa-miR-182-5p#ntaA	22	1.6765	0.5478	0.00221	0	1.0419	TRUE	0.0165
hsa-miR-22-5p#lv3pT	22	-1.6326	0.538	0.00241	0	1.1032	TRUE	0.0175
hsa-miR-204-5p#ntaA	22	2.2075	0.737	0.00274	0.8712	1.4413	TRUE	0.019
hsa-miR-585-3p#lv3pE	22	-2.4678	0.8241	0.00275	0.8359	2.0248	TRUE	0.019
hsa-miR-7-5p#exact	22	0.7619	0.2586	0.00322	0.875	0.2292	TRUE	0.0218
hsa-miR-320a-3p#ntaG	22	1.7245	0.6018	0.00416	0	1.4324	TRUE	0.0275
hsa-miR-423-3p#mv	22	-1.8358	0.643	0.00431	0	1.5307	TRUE	0.0278
hsa-miR-378a-3p#ntaU	22	-1.7438	0.6171	0.00472	0	1.5652	TRUE	0.0298
hsa-miR-664b-5p#lv3pT	22	-1.7334	0.6241	0.00548	0	1.3565	TRUE	0.0339
hsa-miR-516b-5p#lv3pT	22	-1.8834	0.6802	0.00563	1	1.3136	TRUE	0.0341
hsa-miR-151a-3p#lv3pE	22	-0.5727	0.2073	0.00574	0	0.1832	TRUE	0.0341
hsa-miR-509-3-5p#lv3pE	22	-1.5856	0.5774	0.00603	0	1.0638	TRUE	0.0351
hsa-miR-151a-3p#ntaU	22	-1.3026	0.4778	0.0064	1	0.7252	TRUE	0.0365
hsa-miR-941#exact	22	2.3151	0.8511	0.00652	1	2.1566	TRUE	0.0365
hsa-miR-151a-3p#ntaA	22	1.1261	0.4225	0.00769	0.4121	0.7132	TRUE	0.042
hsa-miR-372-3p#ntaU	22	-0.8041	0.3022	0.00779	0	0.4013	TRUE	0.042
hsa-miR-1298-5p#exact	22	-2.0763	0.7866	0.0083	0.305	2.1809	TRUE	0.0439
hsa-miR-371a-5p#lv3pT	22	-1.3831	0.528	0.0088	0	1.2514	TRUE	0.0458
hsa-miR-28-3p#exact	22	-1.7154	0.6593	0.00928	0	1.6513	TRUE	0.0474
